# Supplementary material
Source: Elsevier journal article supplement (https://hal.science/hal-02953317/file/mmc7.pdf)
Supplement: mmc7 [file mmc7.pdf]

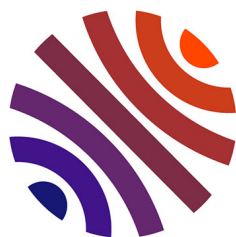

**HAL**  
open science

## Ring-opening polymerization of $\gamma$ -lactones and copolymerization with other cyclic monomers

Qilei Song, Chloé Pascouau, Junpeng Zhao, Guangzhao Zhang, Frédéric Peruch, Stéphane Carlotti

► **To cite this version:**

Qilei Song, Chloé Pascouau, Junpeng Zhao, Guangzhao Zhang, Frédéric Peruch, et al.. Ring-opening polymerization of  $\gamma$ -lactones and copolymerization with other cyclic monomers. *Progress in Polymer Science*, 2020, 110, pp.101309. 10.1016/j.progpolymsci.2020.101309 . hal-02953317

**HAL Id: hal-02953317**

**<https://hal.science/hal-02953317>**

Submitted on 30 Sep 2020

**HAL** is a multi-disciplinary open access archive for the deposit and dissemination of scientific research documents, whether they are published or not. The documents may come from teaching and research institutions in France or abroad, or from public or private research centers.

L'archive ouverte pluridisciplinaire **HAL**, est destinée au dépôt et à la diffusion de documents scientifiques de niveau recherche, publiés ou non, émanant des établissements d'enseignement et de recherche français ou étrangers, des laboratoires publics ou privés.

# Ring-opening polymerization of $\gamma$ -lactones and copolymerization with other cyclic monomers

Qilei Song,<sup>†,‡</sup> Chloé Pascouau,<sup>‡</sup> Junpeng Zhao,<sup>†</sup> Guangzhao Zhang,<sup>†</sup> Frédéric Peruch,<sup>\*,‡</sup> Stéphane Carlotti<sup>\*,‡</sup>

<sup>†</sup> Faculty of Materials Science and Engineering, South China University of Technology, Guangzhou 510640, People's Republic of China

<sup>‡</sup> Univ. Bordeaux, CNRS, Bordeaux INP, LCPO, UMR 5629, F-33600, Pessac, France

**Abstract:** Triggered by raised environmental awareness and the rising requirements for sustainable polymers such as degradable or recyclable polymers, studies on ring-opening (co)polymerization (ROP/ROCP) of (bio-based) cyclic monomers (*e.g.*, cyclic esters, lactides, epoxides *etc.*) have been booming in recent years. Renewable five-membered  $\gamma$ -butyrolactone ( $\gamma$ BL) and derivatives would thus be a desirable feedstock to produce poly( $\gamma$ -butyrolactone) (P $\gamma$ BL) and different (bio-based) functional polyesters. Their copolymerization with other cyclic monomers could also afford an alternative to tune the properties of the resulting materials. Although  $\gamma$ BL was traditionally regarded “non-polymerizable”, some progresses were made recently concerning the ROP/ROCP of  $\gamma$ BL and derivatives. More importantly, some polyesters could be totally depolymerized back to their monomers by thermal or chemical treatment. This review is specially focused on ROP of  $\gamma$ -lactones and their copolymerization with other cyclic monomers by different catalytic/initiating systems, including Lewis/Brønsted acids, organic bases and alkali metal compounds, organometallic compounds, and cooperative bicomponent catalytic systems. The depolymerization process of some obtained polyesters is also discussed.

**Keywords:**  $\gamma$ -lactones, polyester, ring-opening (co)polymerization, sustainable polymer

\* **Corresponding authors:** peruch@enscbp.fr, carlotti@enscbp.f

# Contents

1. Introduction
  2. General aspects of ROP of  $\gamma$ -lactones
    - 2.1  $\gamma$ -lactones and comonomers
    - 2.2 Catalytic systems
  3. Lewis acid-catalyzed ROP/ROCP of  $\gamma$ -lactones
  4. Brønsted acid-catalyzed ROP/ROCP of  $\gamma$ -lactones
  5. Organic base-catalyzed ROP/ROCP of  $\gamma$ -lactones
  6. Alkali metal compound-catalyzed ROP/ROCP of  $\gamma$ -lactones
  7. Organometallic compound-catalyzed ROP/ROCP of  $\gamma$ -lactones
  8. Dual catalytic system-catalyzed ROP/ROCP of  $\gamma$ -lactones
  9. Other polymerization methodologies for  $\gamma$ -lactones
  10. Thermal or chemical recycling of P $\gamma$ BL and other derivatives
  11. Conclusion
- Acknowledgement
- References

## Abbreviations

### *$\gamma$ -Lactones*

|                         |                                                                                 |                                                 |                                                                                                                           |
|-------------------------|---------------------------------------------------------------------------------|-------------------------------------------------|---------------------------------------------------------------------------------------------------------------------------|
| $\alpha$ Ac $\gamma$ BL | $\alpha$ -Acetyl- $\gamma$ -butyrolactone                                       | $\beta$ MMBL                                    | $\beta$ -Methyl- $\alpha$ -methylene- $\gamma$ -butyrolactone                                                             |
| $\alpha$ AL             | $\alpha$ -Angelica lactone (or 5-methyl-2(3 <i>H</i> )-furanone)                | $\gamma$ MBL                                    | $\alpha$ -Methyl- $\gamma$ -butyrolactone                                                                                 |
| $\beta$ AL              | $\beta$ -Angelica lactone (or 5-methylfuran-2(5 <i>H</i> )-one)                 | $\gamma$ MMBL                                   | $\gamma$ -Methyl- $\alpha$ -methylene- $\gamma$ -butyrolactone                                                            |
| $\gamma$ AMMBL          | $\gamma$ -Allyl- $\gamma$ -methyl- $\alpha$ -methylene- $\gamma$ -butyrolactone | $\gamma$ Me <sub>2</sub> MBL                    | $\alpha$ -Methylene- $\gamma,\gamma$ -dimethyl- $\gamma$ -butyrolactone                                                   |
| $\alpha$ Br $\gamma$ BL | $\alpha$ -Bromo- $\gamma$ -butyrolactone                                        | $\alpha$ OH $\gamma$ BL                         | $\alpha$ -Hydroxy- $\gamma$ -butyrolactone                                                                                |
| $\gamma$ BL             | $\gamma$ -Butyrolactone                                                         | $\alpha$ OH $\beta$ Me <sub>2</sub> $\gamma$ BL | $\alpha$ -Hydroxy- $\beta,\beta$ -dimethyl- $\gamma$ -butyrolactone                                                       |
| BBL                     | Bicyclic bis( $\gamma$ -butyrolactone)                                          | (R)- $\gamma$ VL                                | (R)- $\gamma$ -Valerolactone                                                                                              |
| BBL8                    | 2,8-Dioxa-1-isopropenylbicyclo[3.3.0]octane-3,7-dione                           | S-BBL                                           | Bicyclic bis( $\gamma$ -butyrolactone) derivatives bearing sulfide moieties                                               |
| $\gamma$ CL             | $\gamma$ -Caprolactone                                                          | SBL                                             | Spirocyclic ( $\gamma$ -butyrolactone)                                                                                    |
| 4,5-C6L                 | 4,5- <i>cis</i> Cyclohexyl-ring-fused $\gamma$ -butyrolactone                   | SBBL                                            | Spirocyclic bis( $\gamma$ -butyrolactone)                                                                                 |
| <i>rac</i> -CBL         | <i>racemic</i> 3,4-Cyclohexyl-ring-fused $\gamma$ -butyrolactone                | 3,4-T6L                                         | 3,4- <i>trans</i> Cyclohexyl-ring-fused $\gamma$ -butyrolactone                                                           |
| DAMBL                   | $\gamma$ -Diallyl- $\alpha$ -methylene- $\gamma$ -butyrolactone                 | 4,5-T6L                                         | 4,5- <i>trans</i> Cyclohexyl-ring-fused $\gamma$ -butyrolactone (or <i>trans</i> -hexahydro-2(3 <i>H</i> )-benzofuranone) |
| FO                      | 2(5 <i>H</i> )-Furanone                                                         | $\gamma$ VL                                     | $\gamma$ -Valerolactone                                                                                                   |
| $\beta$ HMBL            | Tulipalin B or $\beta$ -hydroxy- $\alpha$ -methylene- $\gamma$ -butyrolactone   | VMBL                                            | $\gamma$ -Vinyl- $\alpha$ -methylene- $\gamma$ -butyrolactone                                                             |
| 3-HMFO                  | 3-(Hydroxymethyl) furan-2(5 <i>H</i> )-one                                      | $\gamma$ VMMBL                                  | $\gamma$ -Vinyl- $\gamma$ -methyl- $\alpha$ -methylene- $\gamma$ -butyrolactone                                           |
| 3-MFO                   | 3-Methylfuran-2(5 <i>H</i> )-one                                                | VMMBL                                           | $\gamma$ -Vinyl- $\beta$ -methyl- $\alpha$ -methylene- $\gamma$ -butyrolactone                                            |
| $\alpha$ MBL            | Tulipalin A or $\alpha$ -methylene- $\gamma$ -butyrolactone                     |                                                 |                                                                                                                           |

### Comonomers

|                 |                                                |              |                            |
|-----------------|------------------------------------------------|--------------|----------------------------|
| AOMECE          | 2-Allyloxymethyl-2-ethyltrimethylene carbonate | GME          | Glycidyl methyl ether      |
| $\beta$ BL      | $\beta$ -Butyrolactone                         | HO           | 1-Hexene oxide             |
| <i>t</i> -BuGE  | <i>tert</i> -Butyl glycidyl ether              | LLA          | L-Lactide                  |
| BCMO            | 3,3-Bis(chloromethyl)oxetane                   | MMA          | Methyl methacrylate        |
| DGEBA           | Diglycidyl ether bisphenol A                   | PO           | Propylene oxide            |
| DGEBS           | Diglycidyl ether bisphenol S                   | PC           | Propylene carbonate        |
| $\epsilon$ CL   | $\epsilon$ -Caprolactone                       | $\beta$ PL   | $\beta$ -Propiolactone     |
| CHO             | Cyclohexene oxide                              | $\omega$ PDL | $\omega$ -Pentadecalactone |
| CO <sub>2</sub> | Carbon dioxide                                 | SO           | Styrene oxide              |
| EC              | Ethylene carbonate                             | TMC          | Trimethylene carbonate     |
| GP              | Glycidyl pivalate                              | TeU          | Tetramethylene urea        |
| GPE             | Glycidyl phenyl ether                          | $\delta$ VL  | $\delta$ -Valerolactone    |

### Polymers

|                                     |                                                                             |                                         |                                                                                               |
|-------------------------------------|-----------------------------------------------------------------------------|-----------------------------------------|-----------------------------------------------------------------------------------------------|
| <i>P</i> $\alpha$ AL                | Poly( $\alpha$ -angelica lactone)                                           | PGA                                     | Poly(glycolic acid)                                                                           |
| <i>P</i> ( $\alpha$ Ac $\gamma$ BL) | Poly( $\alpha$ -acetyl- $\gamma$ -butyrolactone)                            | PGM                                     | Poly(glycidyl methacrylate)                                                                   |
| <i>P</i> $\gamma$ BL                | Poly( $\gamma$ -butyrolactone)                                              | PGMS                                    | Poly(4-(glycidyl methyl)styrene)                                                              |
| <i>P</i> $\gamma$ BL <sub>L1</sub>  | Linear poly( $\gamma$ -butyrolactone) with acylated lactone/H chain ends    | P4HB                                    | Poly(4-hydroxybutyrate)                                                                       |
| <i>P</i> $\gamma$ BL <sub>L2</sub>  | Linear poly( $\gamma$ -butyrolactone) with BnO/H chain ends                 | <i>P</i> ( $\alpha$ MBL) <sub>VAP</sub> | Poly( $\alpha$ -methylene- $\gamma$ -butyrolactone) produced by vinyl-addition polymerization |
| <i>P</i> $\gamma$ BL <sub>L3</sub>  | Linear poly( $\gamma$ -butyrolactone) with MeO/H chain ends                 | <i>P</i> ( $\alpha$ MBL) <sub>CLP</sub> | Poly( $\alpha$ -methylene- $\gamma$ -butyrolactone) produced by cross-linked polymerization   |
| <i>P</i> $\gamma$ BL <sub>C</sub>   | Cyclic poly( $\gamma$ -butyrolactone)                                       | <i>P</i> ( $\alpha$ MBL) <sub>ROP</sub> | Poly( $\alpha$ -methylene- $\gamma$ -butyrolactone) produced by ring-opening polymerization   |
| PCL                                 | Poly( $\epsilon$ -caprolactone)                                             | <i>P</i> (3,4-T6L)                      | Poly(3,4- <i>trans</i> cyclohexyl-ring-fused $\gamma$ -butyrolactone)                         |
| <i>ht</i> -PCBL                     | <i>heterotactic</i> Poly(3,4-cyclohexyl-ring-fused $\gamma$ -butyrolactone) | <i>P</i> (4,5-T6L)                      | Poly(4,5- <i>trans</i> cyclohexyl-ring-fused $\gamma$ -butyrolactone)                         |
| <i>it</i> -PCBL                     | <i>isotactic</i> Poly(3,4-cyclohexyl-ring-fused $\gamma$ -butyrolactone)    | PVL                                     | Poly( $\delta$ -valerolactone)                                                                |
| PFO                                 | Poly(2(5 <i>H</i> )-furanone)                                               |                                         |                                                                                               |

Catalysts/Initiators

|                                                 |                                                                                                                                                           |                                                              |                                                                                                                                                                                                                               |
|-------------------------------------------------|-----------------------------------------------------------------------------------------------------------------------------------------------------------|--------------------------------------------------------------|-------------------------------------------------------------------------------------------------------------------------------------------------------------------------------------------------------------------------------|
| AlEt <sub>3</sub> -H <sub>2</sub> O             | Triethylaluminium-water                                                                                                                                   | iBu                                                          | 1,3-Di- <i>tert</i> -butylimidazol-2-ylidene                                                                                                                                                                                  |
| Al(O <sup><i>i</i></sup> Pr) <sub>3</sub>       | Aluminium isopropoxide                                                                                                                                    | IMes                                                         | 1,3-Bis-(2,4,6-trimethylphenyl)imidazol-2-ylidene                                                                                                                                                                             |
| BDM                                             | 1,4-Benzenedimethanol                                                                                                                                     | iPr                                                          | 1,3-Bis(isopropyl)-4,5(dimethyl)imidazol-2-ylidene                                                                                                                                                                            |
| BEMP                                            | 2- <i>tert</i> -Butylimino-2-diethylamino-1,3-dimethylperhydro-1,3,2-diazaphosphorine                                                                     | K <sub>2</sub> CO <sub>3</sub>                               | Potassium carbonate                                                                                                                                                                                                           |
| BF <sub>3</sub> •Et <sub>2</sub> O              | Trifluoride diethyl etherate                                                                                                                              | KH                                                           | Potassium hydride                                                                                                                                                                                                             |
| BF <sub>3</sub> •EtNH <sub>2</sub>              | Boron trifluoride ethylamine complex                                                                                                                      | KOH                                                          | Potassium hydroxide                                                                                                                                                                                                           |
| BF <sub>3</sub> •4MA                            | Boron trifluoride <i>p</i> -methoxyaniline complex                                                                                                        | LaCl <sub>3</sub>                                            | Lanthanum(III) chloride                                                                                                                                                                                                       |
| Bi(OTf) <sub>3</sub>                            | Bismuth(III) trifluoromethanesulfonate                                                                                                                    | La[N(SiMe <sub>3</sub> ) <sub>2</sub> ] <sub>3</sub> (or La) | Tri[ <i>N,N</i> -bis(trimethylsilyl)amide]lanthanum(III)                                                                                                                                                                      |
| <sup><i>n</i></sup> Bu <sub>4</sub> NBr         | Tetrabutylammonium bromide                                                                                                                                | [La(OBn) <sub>3</sub> ] <sub>x</sub>                         | Obtained by the stoichiometric reaction of La and BnOH                                                                                                                                                                        |
| <i>t</i> -BuOK                                  | Potassium <i>tert</i> -butoxide                                                                                                                           | La(OTf) <sub>3</sub>                                         | Lanthanum(III) trifluoromethanesulfonate                                                                                                                                                                                      |
| <i>n</i> -BuLi                                  | <i>n</i> -Butyl lithium                                                                                                                                   | LDA                                                          | Diisopropylamide                                                                                                                                                                                                              |
| <i>n</i> -Bu <sub>2</sub> Mg                    | Di- <i>n</i> -butylmagnesium                                                                                                                              | LiCl                                                         | Lithium chloride                                                                                                                                                                                                              |
| <i>n</i> -BuEtMg                                | <i>n</i> -Butylethylmagnesium                                                                                                                             | LiX                                                          | Lithium halides                                                                                                                                                                                                               |
| <i>n</i> -BuONa                                 | Sodium <i>n</i> -butoxide                                                                                                                                 | Ln[N(SiMe <sub>3</sub> ) <sub>2</sub> ] <sub>3</sub>         | Lanthanide analogues (Ln = Y, Sm)                                                                                                                                                                                             |
| <i>t</i> -BuP <sub>1</sub>                      | <i>tert</i> -Butylimino-tris(dimethylamino)phosphorane                                                                                                    | MeLi                                                         | Methyl lithium                                                                                                                                                                                                                |
| <i>t</i> -BuP <sub>2</sub>                      | 1- <i>tert</i> -Butyl-2,2,4,4,4-pentakis(dimethylamino)-2λ <sup>5</sup> ,4λ <sup>5</sup> -catenadi(phosphazene)                                           | Me <sub>6</sub> TREN                                         | Tris[2-(dimethylamino)ethyl]amine                                                                                                                                                                                             |
| <i>t</i> -BuP <sub>4</sub>                      | 1- <i>tert</i> -Butyl-4,4,4-tris(dimethylamino)-2,2-bis[tris(dimethylamino)phosphoranylidenamino]-2λ <sup>5</sup> ,4λ <sup>5</sup> -catenadi(phosphazene) | MgCl <sub>2</sub>                                            | Magnesium chloride                                                                                                                                                                                                            |
| <i>n</i> -Bu <sub>2</sub> Sn(OMe) <sub>2</sub>  | Dibutyldimethoxytin                                                                                                                                       | 1-MI                                                         | 1-Methylimidazole                                                                                                                                                                                                             |
| Cyclic tin alkoxide                             | 1,1,6,6-Tetra- <i>n</i> -butyl-1,6-distanna-2,5,7,10-tetraoxacyclo-decane                                                                                 | MSA                                                          | Methanesulfonic acid                                                                                                                                                                                                          |
| CTPB                                            | Cyclic trimeric phosphazene base                                                                                                                          | MtOMe                                                        | Sodium or potassium methoxides                                                                                                                                                                                                |
| DABCO                                           | 1,4-Diazabicyclo[2.2.2] octane                                                                                                                            | MtX                                                          | Metal halides                                                                                                                                                                                                                 |
| DBU                                             | 1,8-Diazabicyclo[5.4.0]undec-7-ene                                                                                                                        | NaH                                                          | Sodium hydride                                                                                                                                                                                                                |
| DMAP                                            | <i>N,N</i> -Dimethyl-4-aminopyridine                                                                                                                      | NaOH                                                         | Sodium hydroxide                                                                                                                                                                                                              |
| DPP                                             | Diphenyl phosphate                                                                                                                                        | NEMO                                                         | Non-eutectic mixture of organocatalysts (MSA/TBD = 3/1)                                                                                                                                                                       |
| Et <sub>2</sub> AlCl                            | Diethylaluminum chloride                                                                                                                                  | NHC                                                          | <i>N</i> -Heterocyclic carbene                                                                                                                                                                                                |
| Et <sub>3</sub> Al <sub>2</sub> Cl <sub>3</sub> | Ethylaluminum sesquichloride                                                                                                                              | NHO                                                          | <i>N</i> -Heterocyclic olefin                                                                                                                                                                                                 |
| Et <sub>3</sub> N                               | Triethylamine                                                                                                                                             | NHO3                                                         | 1,3-Dimethyl-2-(1-methylethylidene)tetrahydropyrimidine                                                                                                                                                                       |
| Et <sub>3</sub> O(BF <sub>4</sub> )             | Triethyloxonium tetrafluoroborate                                                                                                                         | NHO4                                                         | 2-Isopropylidene-1,3,4,5-tetramethylimidazoline                                                                                                                                                                               |
| FeCl <sub>3</sub>                               | Iron(III) chloride                                                                                                                                        | NHO6                                                         | 1,3-Dimesityl-2-methylidene-tetrahydropyrimidine                                                                                                                                                                              |
| FSO <sub>3</sub> H                              | Fluorosulfonic acid                                                                                                                                       | NHO7                                                         | 1,3,4,5-Tetramethyl-2-methyleneimidazoline                                                                                                                                                                                    |
| HAPENAIO <sup><i>i</i></sup> Pr                 | Aluminum Schiff's base complex                                                                                                                            | PBM                                                          | Polymer supported bimetallic complexes in the form of P-Zn[Fe(CN) <sub>6</sub> ] <sub>a</sub> Cl <sub>2-3a</sub> (H <sub>2</sub> O) <sub>b</sub> , where P is a polyether chelating agent, <i>a</i> ≈ 0.5 and <i>b</i> ≈ 0.76 |
| HBf <sub>4</sub> •Et <sub>2</sub> O             | Tetrafluoroboric acid diethyl ether complex                                                                                                               | P <sup><i>n</i></sup> Bu <sub>3</sub>                        | Tri- <i>n</i> -butylphosphine                                                                                                                                                                                                 |
| HCl•Et <sub>2</sub> O                           | Hydrochloric acid in diethyl ether                                                                                                                        | PCy <sub>3</sub>                                             | Tricyclohexylphosphine                                                                                                                                                                                                        |
| HO-PEG-OH                                       | Dihydroxy-terminated poly(ethylene glycol)                                                                                                                | PPh <sub>3</sub>                                             | Triphenylphosphine                                                                                                                                                                                                            |
| H <sub>3</sub> PO <sub>4</sub>                  | Phosphoric acid                                                                                                                                           | PEG-OH                                                       | Monohydroxy-terminated poly(ethylene glycol)                                                                                                                                                                                  |

|                                         |                                                                                                           |                                     |                                                                                                             |
|-----------------------------------------|-----------------------------------------------------------------------------------------------------------|-------------------------------------|-------------------------------------------------------------------------------------------------------------|
| Ph <sub>2</sub> CHCH <sub>2</sub> OH    | 2,2-Diphenylethanol                                                                                       | TU                                  | Thiourea                                                                                                    |
| PhCH <sub>2</sub> OH (or BnOH)          | Benzyl alcohol                                                                                            | TU1                                 | 1,3-Diisopropyl-2-thiourea                                                                                  |
| Ph <sub>2</sub> CHOH                    | Diphenylmethanol                                                                                          | TU2                                 | 1-[3,5-Bis(trifluoromethyl) phenyl]-3-cyclohexyl-thiourea                                                   |
| <i>n</i> -PrONa                         | Sodium <i>n</i> -propoxide                                                                                |                                     |                                                                                                             |
| <i>i</i> -PrONa                         | Sodium isopropoxide                                                                                       | U1                                  | 1-Cyclohexyl-3-phenyl-urea                                                                                  |
| <i>i</i> -PrOH                          | Isopropanol                                                                                               | U2                                  | 1-Cyclohexyl-3-(4-methoxyphenyl)-urea                                                                       |
| Ph <sub>4</sub> Sn                      | Tetraphenyl tin                                                                                           | U3                                  | 1,3-Diphenylurea                                                                                            |
| R <sub>3</sub> N                        | <i>N,N</i> -Dimethylcyclohexylamine                                                                       | U4                                  | 1-[3,5-Bis(trifluoromethyl) phenyl]-3-phenyl-urea                                                           |
| SalenCo <sup>III</sup> X                | Salen = <i>N,N</i> -bis(3,5-di- <i>tert</i> -butylsalicylidene)-ethylenediimine, X = 2,4-dinitrophenoxide | U5                                  | 1-Cyclohexyl-3-(4-(trifluoromethyl)phenyl)-urea                                                             |
| SbF <sub>3</sub>                        | Antimony(III) fluoride                                                                                    | U6                                  | 1-(4-Chlorophenyl)-3-cyclohexyl-urea                                                                        |
| Sc(OTf) <sub>3</sub>                    | Scandium(III) trifluoromethanesulfonate                                                                   | U7                                  | 1,3-Bis(3,5-bis(trifluoromethyl)phenyl)-urea                                                                |
| SmI <sub>2</sub> /Sm                    | Samarium(II) iodide-based complex                                                                         | Y                                   | Discrete single-site yttrium complex                                                                        |
| Sm(OAr) <sub>2</sub> (THF) <sub>3</sub> | Samarium(II) aryloxide complex                                                                            | Y1a                                 | Tetradentate amino-bisphenolate yttrium alkyl complex                                                       |
| SnCl <sub>4</sub>                       | Tin(IV) chloride                                                                                          | Y1i                                 | Bisphenolate yttrium amido complex with <i>p</i> -CMePh <sub>2</sub> substituents                           |
| SnCl <sub>2</sub> •2H <sub>2</sub> O    | Tin(II) chloride dihydrate                                                                                | Y1j                                 | Bisphenolate yttrium amido complex with trityl substituents                                                 |
| Sn(Oct) <sub>2</sub>                    | Tin( II ) 2-ethylhexanoate                                                                                | Y2                                  | Bisphenolate yttrium amido complex                                                                          |
| TBD                                     | 1,5,7-Triazabicyclo[4.4.0]dec-5-ene                                                                       | Yb(OTf) <sub>3</sub>                | Ytterbium(III) trifluoromethanesulfonate                                                                    |
| TfOH                                    | Trifluoromethanesulfonic acid                                                                             | YCl <sub>3</sub>                    | Yttrium(III) chloride                                                                                       |
| <i>p</i> -TfOH                          | <i>p</i> -Toluenesulfonic acid                                                                            | Y-O <sup>i</sup> Pr                 | Obtained by the stoichiometric reaction of either Y1a or Y2 with 2-propanol                                 |
| TfOMe                                   | Methyl trifluoromethanesulfonate                                                                          | Zn1                                 | 2,6-Diisopropylphenylsubstituted $\beta$ -diiminate zinc isopropoxide complex (or (BDI)ZnO <sup>i</sup> Pr) |
| TPT                                     | 1,3,4-Triphenyl-4,5-dihydro-1 <i>H</i> -1,2,4-triazol-5-ylidene                                           | ZnCl <sub>2</sub>                   | Zinc chloride                                                                                               |
|                                         |                                                                                                           | ZnEt <sub>2</sub> -H <sub>2</sub> O | Diethylzinc associated with water                                                                           |
|                                         |                                                                                                           | ZnI <sub>2</sub>                    | Zinc iodide                                                                                                 |

## 1. Introduction

Aliphatic (co)polyesters with biodegradability and biocompatibility, due to their widespread applications, have been the subject of increasing interest [1-3]. There are two pathways to produce such polymers. First, the polycondensation of diols with diacids or diesters or of hydroxyesters or hydroxyacids. This usually needs high energy-consumption and is also not atom-efficient as side-products are released (water, alcohols, *etc.*). Second, ring-opening polymerization (ROP) of the corresponding cyclic esters provides an interesting alternative. The latter was demonstrated to be a powerful strategy to synthesize (co)polyesters containing different macromolecular architectures in a controlled/living manner [4-7]. Among the manifold lactones used, the five-membered  $\gamma$ -butyrolactone ( $\gamma$ BL) is a renewable monomer derived from succinic acid, which was ranked as a top biomass-derived compound [8, 9]. The ROP of  $\gamma$ BL offers a feasible method to produce poly( $\gamma$ -butyrolactone) (P $\gamma$ BL), a structural equivalent of poly(4-hydroxybutyrate) (P4HB), which can be obtained from a bacterial fermentation process [10].

Different from the commonly employed lactones with high ring strain,  $\gamma$ BL was traditionally regarded as “non-polymerizable”, resulting from the low strain energy of five-membered ring, so that the negative change of enthalpy ( $\Delta H_p$ ) on ring-opening is too small to overcome a large negative entropic change ( $\Delta S_p$ ) in a ROP [11-15]. Thus, the ceiling temperature and concentration of each  $\gamma$ -lactone should be considered to obtain a thermodynamically-favored polymerization. Tracing back to the 1930s–1950s, the first attempts to polymerize  $\gamma$ BL were unsuccessful [16, 17]. Later (1960s), only

oligomers of P $\gamma$ BL were synthesized under extreme reaction conditions (*e.g.*, 20,000 atm, 160 °C) [18]. Therefore, synthesis of P $\gamma$ BL with high molar mass under mild conditions remained a challenge in polymer synthesis for several decades. In comparison, the ROP of  $\gamma$ BL derivatives such as  $\alpha$ -methylene- $\gamma$ -butyrolactones (or tulipalin A,  $\alpha$ MBL),  $\alpha$ -angelica lactone ( $\alpha$ AL) and  $\beta$ -angelica lactone ( $\beta$ AL) affords the formation of unsaturated polyesters, which could undergo post-functionalization [19]. However, the investigation of such process was limited due to the presence of additional functional groups (*i.e.*, endocyclic or exocyclic C=C) that may also be polymerized by vinyl-addition route [20]. Ring-opening copolymerization (ROCP) of  $\gamma$ -lactones or its derivatives with other cyclic monomers provides a bypass to circumvent the difficulties in their homopolymerization. The comonomers may be lactones, cyclic carbonates, and epoxides as well as some polymers. Examples of successful applications of this process will be discussed in this review.

Noticeably, a breakthrough was made in the ROP of  $\gamma$ BL in recent years. The polymerization was carried out at low temperatures (below the ceiling temperature,  $T_c$ ) and high monomer concentrations, yielding linear/cyclic P $\gamma$ BLs with high molar masses [21-26]. The recent development of powerful catalytic/initiating systems also allowed the ROP of  $\gamma$ BL derivatives as well as their copolymerization. The thermal or chemical depolymerization of some resultant polyesters back to the corresponding monomer was also achieved, which not only highlights the advantage of these materials, but also satisfies the rising demand of sustainable/recyclable polymers [27-36].

Up until now, several reviews were published focusing on the ROP of  $\gamma$ BL or its



derivatives [10, 37-40]. In this review, we intend to summarize and comment on the previous and recent studies on ROP/ROCP of  $\gamma$ BL and derivatives by different polymerization mechanisms including cationic, anionic, coordination-insertion mechanisms and related ones. The various catalytic systems described in the literatures will be presented, and the recent progresses will be emphasized. Noticeably, only the polymerization of  $\gamma$ BL and derivatives via ring-opening is involved here, and other polymerization methods such as group-transfer polymerization (GTP), ring-opening olefin metathesis polymerization (ROMP), radical polymerization, vinyl-addition polymerization (VAP) or frustrated Lewis pair polymerization (FLP) through the C=C of  $\gamma$ BL derivatives are not discussed [41-43]. In addition, only the derivatives containing  $\gamma$ BL ring will be discussed. Other five-membered lactone derivatives such as  $\gamma$ -thiobutyrolactone [44, 45],  $\gamma$ -thionobutyrolactone [46], and  $\gamma$ -selenobutyrolactone [47, 48] are also excluded herein because of their different polymerizability, due to the variant hetero atoms contained in the ring.

## 2. General aspects of ROP of $\gamma$ -lactones

### 2.1 $\gamma$ -lactones and comonomers

Figure 1 lists  $\gamma$ BL and representative derivatives that were studied for ROP/ROCP (except for the blue ones which are still unsuccessful in this chemistry). Functional  $\gamma$ BL derivatives such as  $\alpha$ MBL,  $\alpha$ AL and  $\beta$ AL can be produced from renewable resources. For instance,  $\alpha$ MBL can be isolated from the tulips, while  $\alpha$ AL,  $\beta$ AL can be derived from levulinic acid [49]. The ROP/ROCP of these exocyclic/endocyclic C=C contained

$\gamma$ BL derivatives can afford the formation of unsaturated (co)polyesters. On the other hand, the polymerizability of  $\gamma$ BL could be highly improved by the presence of proper substituents at suitable positions. Therefore, the polymerization of spirocyclic ( $\gamma$ -butyrolactone) or cyclohexyl-ring-fused  $\gamma$ BL was achieved under mild conditions.

In addition, copolymerization of  $\gamma$ BL or its derivatives with other cyclic monomers enriches the diversity of obtained polymer structures. Figure 2 lists the comonomers used in copolymerization with  $\gamma$ BL/its derivatives.

#### $\gamma$ -Butyrolactones

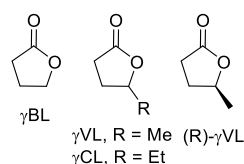

#### $\alpha$ -Substituent- $\gamma$ -butyrolactones

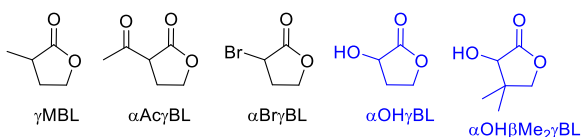

#### $\alpha$ -Methylene- $\gamma$ -butyrolactones

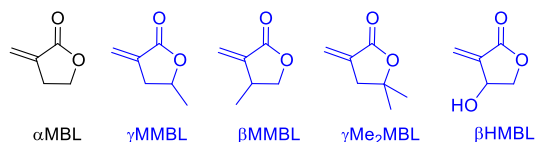

#### Unsaturated $\gamma$ -lactones

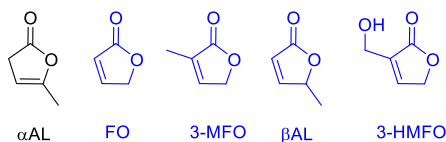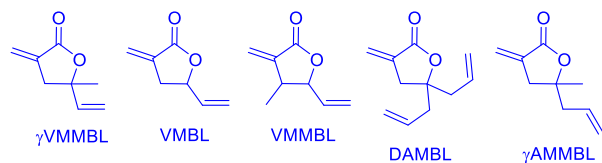

#### Cyclohexyl-fused $\gamma$ -butyrolactones

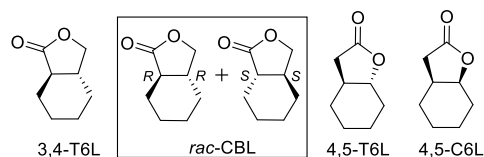

#### Bicyclobis( $\gamma$ -butyrolactone)s

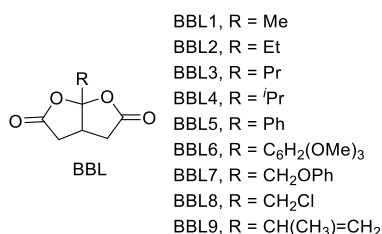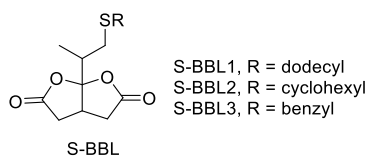

#### Spirocyclic $\gamma$ -butyrolactone

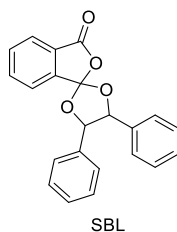

#### Spirocyclic bis( $\gamma$ -butyrolactone)s

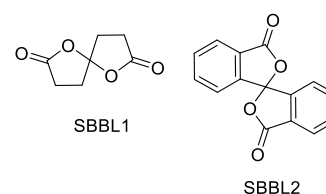

**Fig. 1.**  $\gamma$ -lactones (those in blue were not polymerized in ring-opening pathway).

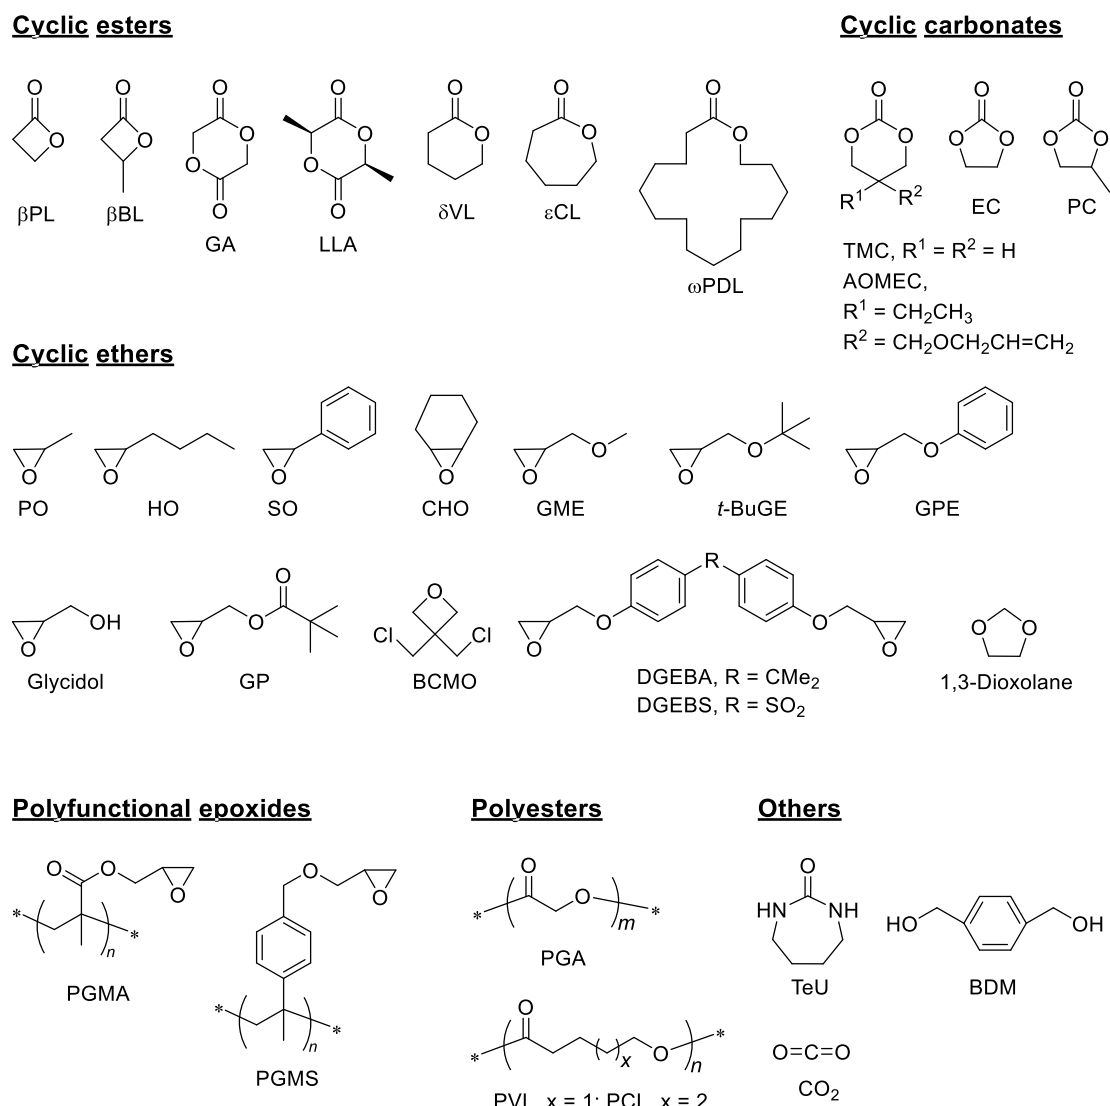

**Fig. 2.** Representative comonomers used in copolymerization with  $\gamma$ -lactones.

## 2.2 Catalytic systems

A variety of Lewis/Brønsted acids, metal-based complexes, and organic compounds were employed as catalysts/initiators for ROP/ROCP of  $\gamma$ BL and derivatives. These catalytic systems induce mainly ionic and coordination-insertion

mechanisms. Bicomponent catalytic systems, which usually consist of an acid (or hydrogen-bond donator) and a basic component (hydrogen-bond acceptor), were also employed. Figure 3 shows the representative catalysts/initiators which were used for the ROP/ROCP of  $\gamma$ -lactones. The chemistries discussed in detail in the following.

## 1. Acids

### Lewis Acids

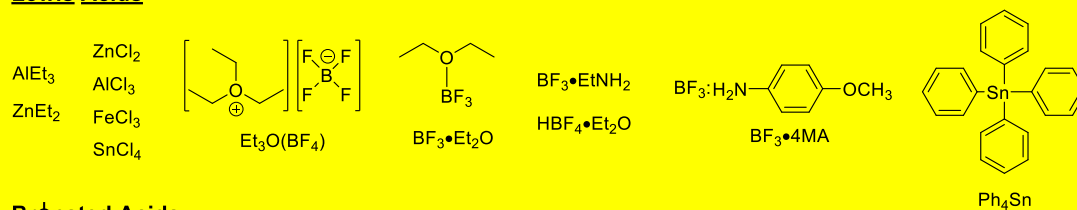

### Bronsted Acids

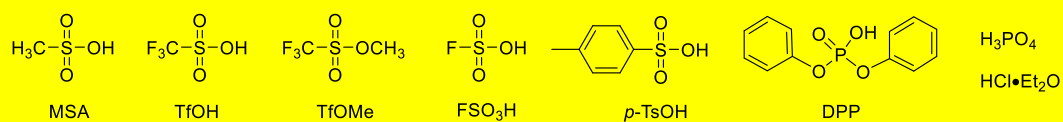

## 2. Bases

### Organic bases

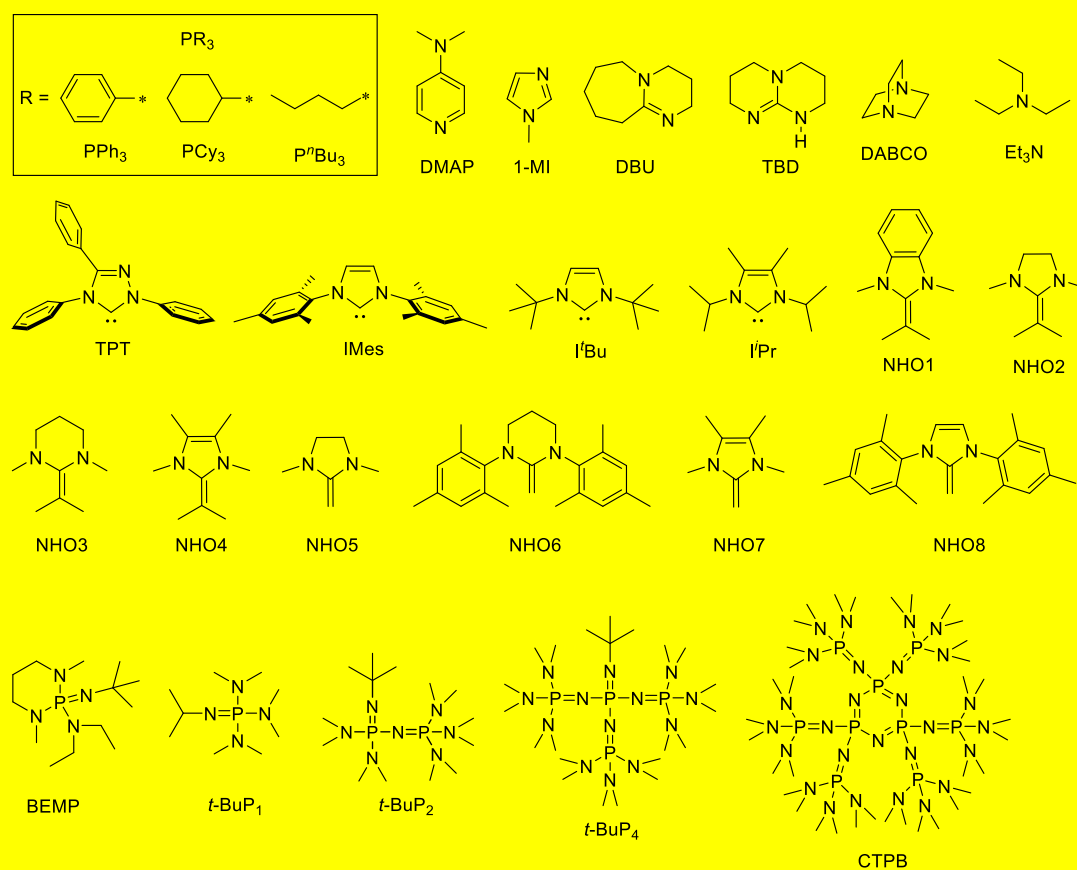

### Alkali metal compounds

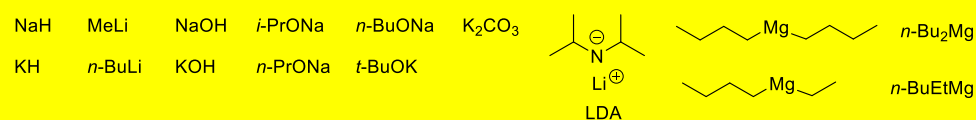

### 3. Organometallic compounds

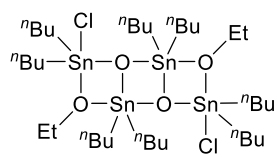

1-Ethoxy-3-chlorotetrabutylidistannoxane

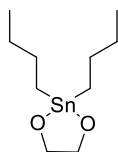

Cyclic tin alkoxide

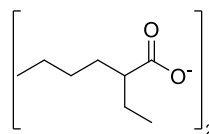

Sn(Oct)<sub>2</sub>

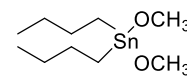

*n*-Bu<sub>2</sub>Sn(OMe)<sub>2</sub>

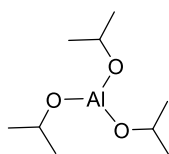

Al(O<sup>*i*</sup>Pr)<sub>3</sub>

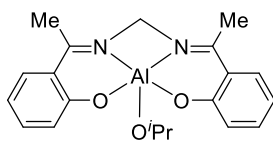

HAPENAlO<sup>*i*</sup>Pr

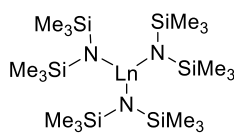

Ln[N(SiMe<sub>3</sub>)<sub>2</sub>]<sub>3</sub>  
Ln = La, Y, Sm

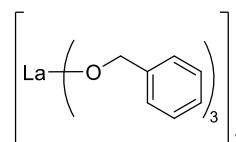

[La(OBn)<sub>3</sub>]<sub>x</sub>

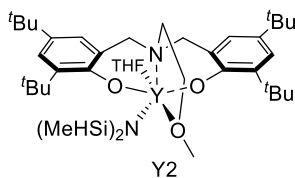

Y<sub>2</sub>

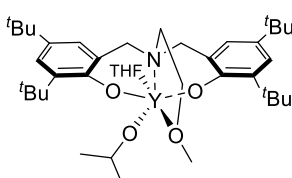

Y-O<sup>*i*</sup>Pr

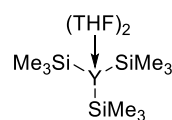

Y-(CH<sub>2</sub>SiMe<sub>3</sub>)<sub>3</sub>(THF)<sub>2</sub>

SmI<sub>2</sub>/Sm

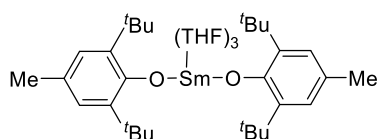

Sm(OAr)<sub>2</sub>(THF)<sub>3</sub>

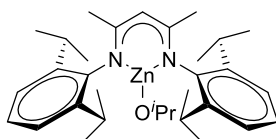

Zn<sub>1</sub>

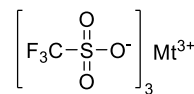

Bi(OTf)<sub>3</sub> Sc(OTf)<sub>3</sub>

La(OTf)<sub>3</sub> Yb(OTf)<sub>3</sub>

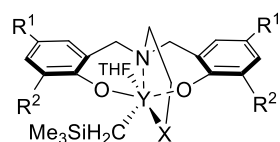

|                                                           | X = OMe | X = NMe <sub>2</sub> | X = NEt <sub>2</sub> |
|-----------------------------------------------------------|---------|----------------------|----------------------|
| R <sup>1</sup> = R <sup>2</sup> = <sup><i>t</i></sup> Bu  | Y1a     | Y1b                  | Y1k                  |
| R <sup>1</sup> = R <sup>2</sup> = Me                      | Y1c     | —                    | —                    |
| R <sup>1</sup> = R <sup>2</sup> = Cl                      | Y1d     | Y1e                  | —                    |
| R <sup>1</sup> = R <sup>2</sup> = -Cumyl                  | Y1f     | Y1g                  | Y1h                  |
| R <sup>1</sup> = Me, R <sup>2</sup> = -CMePh <sub>2</sub> | —       | Y1i                  | —                    |
| R <sup>1</sup> = Me, R <sup>2</sup> = -CPh <sub>3</sub>   | —       | Y1j                  | —                    |

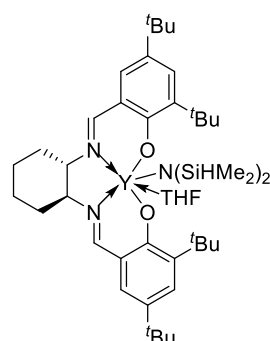

Y<sub>3</sub>

#### 4. Dual catalytic systems

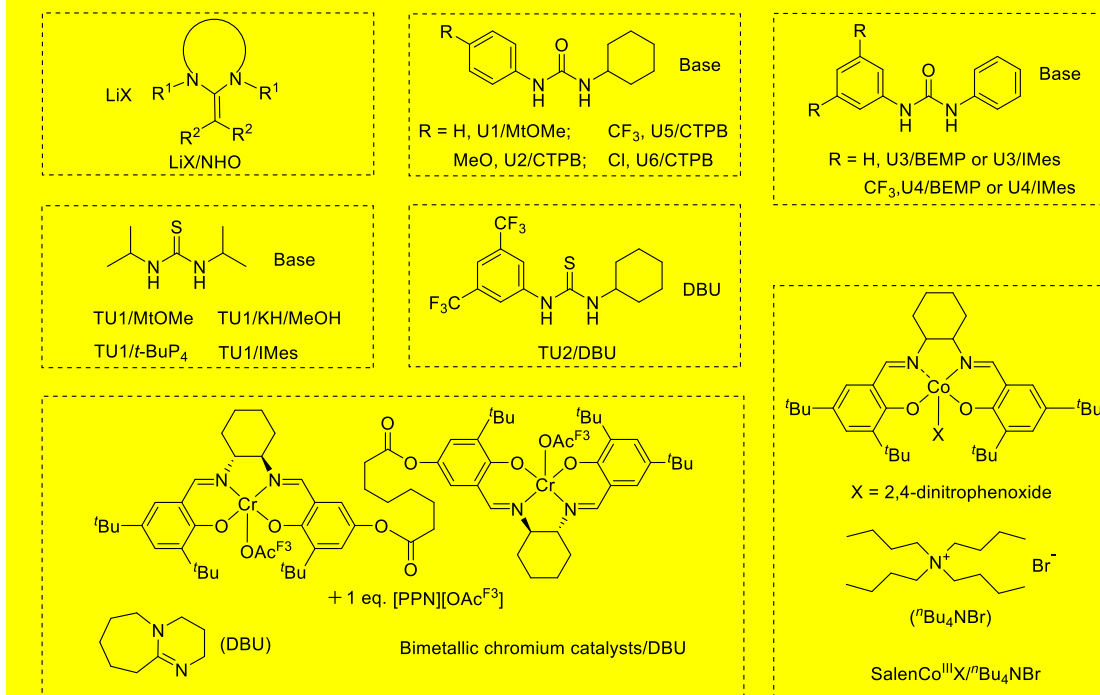

**Fig. 3.** Representative catalysts/initiators for ROP/ROCP of  $\gamma$ -lactones.

#### 3. Lewis acid-catalyzed ROP/ROCP of $\gamma$ -lactones

First attempts to polymerize  $\gamma$ BL by ROP started in the thirties, however, without success. Large sample volumes, high temperature, high pressure, using  $\text{ZnCl}_2$  or  $\text{Et}_3\text{O}(\text{BF}_4)$  yielded no polymer or oligomer [16, 18, 50]. The ROP of  $\alpha$ AL,  $\beta$ AL,  $\alpha\text{OH}\gamma$ BL and  $\alpha\text{Ac}\gamma$ BL were also studied with very limited success, despite the use of Lewis acids based on Sn, B or Al [51-57].

Considering those difficulties, copolymerization of  $\gamma$ BL with other cyclic monomers (*e.g.*, lactones, epoxides) provides an alternative and is the route to follow with Lewis acids. For instance,  $\text{AlEt}_3/\text{H}_2\text{O}$  was shown to copolymerize  $\gamma$ BL with  $\beta$ -propiolactone ( $\beta$ PL) [58]. The polymerization was performed at 0 °C in

dichloromethane (DCM) for 3 days, which yielded copolymers with up to 29% incorporation of  $\gamma$ BL. The reactivity ratios were determined to be  $r_{\gamma\text{BL}} = 0.36$  and  $r_{\beta\text{PL}} = 18$ , revealing the low copolymerizability of  $\gamma$ BL. Those conditions and results revealed the tricky character of this monomer.

Following that study, copolymerization of  $\gamma$ BL and 3,3-bis(chloromethyl)oxetane (BCMO) was investigated in toluene at RT with tin(IV) chloride ( $\text{SnCl}_4$ ) and trifluoride diethyl etherate ( $\text{BF}_3 \cdot \text{Et}_2\text{O}$ ) [59]. Alternating copolymers were produced in low yields. The  $\gamma$ BL was believed to be coordinated to the Lewis acids, which contributed to its enhanced activity and led to the copolymerization in an alternating way. Glycidyl phenyl ether (GPE) was also used as a comonomer with  $\text{BF}_3$ -based systems, yielding spiroorthoesters and oligomers with low  $\gamma$ BL content [60, 61].

In the 1980s, several Lewis acids such as iron(III) chloride ( $\text{FeCl}_3$ ), aluminium (III) chloride ( $\text{AlCl}_3$ ) and  $\text{BF}_3 \cdot \text{Et}_2\text{O}$  were utilized for the random copolymerization of  $\gamma$ BL and glycolide at 60 °C in bulk (Scheme 1a) [62].  $\text{FeCl}_3$  showed the best performances, providing copolymers with the highest  $\gamma$ BL incorporation (25%) at a feed ratio of  $[\gamma\text{BL}]/[\text{glycolide}] = 4/1$ . In addition,  $\text{BF}_3 \cdot \text{Et}_2\text{O}$  was employed for this copolymerization under the same conditions with an alcohol (*e.g.*, benzyl alcohol,  $\text{BnOH}$ ) as the initiator (Scheme 1a) [63]. The presence of alcohols improved both the polymer yield and  $\gamma$ BL incorporation (up to 34%). Random poly( $\gamma$ BL-*co*-GA)s with  $\overline{M}_n$  in the range 5.4–7.3 kg.mol<sup>-1</sup> and relative low dispersity ( $D = 1.17$ – $1.30$ ) were obtained, exhibiting slightly lower degradation temperatures ( $T_d = 241$  °C) than poly(glycolic acid).



ROCP of  $\gamma$ BL or (R)- $\gamma$ -valerolactone ((R)- $\gamma$ VL) with  $\beta$ -butyrolactone ( $\beta$ BL) was performed in bulk at RT for 7 days (Scheme 1b).  $\text{AlEt}_3$  and  $\text{ZnEt}_2$  were able to homopolymerize  $\beta$ BL, whereas  $\text{BF}_3 \cdot \text{Et}_2\text{O}$  was able to trigger the copolymerization to yield poly( $\gamma$ BL-*co*- $\beta$ BL)s ( $\overline{M}_n = 1.8\text{--}4.4 \text{ kg}\cdot\text{mol}^{-1}$ ,  $D = 1.3\text{--}1.8$ ), which were identical to poly(hydroxy alkanate)s produced by microorganisms [64, 65]. The  $\gamma$ BL incorporation in the copolymer was enhanced with the increased feed ratio of  $[\gamma\text{BL}]/[\beta\text{BL}]$ , to reach 56% at a molar ratio of 90/10. It was inferred that the polymerization was initiated by residual water contained in the reaction medium through the attack of  $\text{BF}_3$ -activated monomer. This suggested the possibility of using alcohols as initiators, and such dihydroxy-telechelic copolymers were prepared as an example.

The copolymerization of  $\alpha$ Ac $\gamma$ BL and  $\beta$ BL was also performed using  $\text{BF}_3 \cdot \text{Et}_2\text{O}$  in bulk at RT for 4 weeks (Scheme 1c) [55]. Yields up to 78% were observed with 9–74% of  $\alpha$ Ac $\gamma$ BL in the copolymer as feed ratios of  $[\alpha\text{Ac}\gamma\text{BL}]/[\beta\text{BL}]$  were varied from 20/80 to 80/20 ( $\overline{M}_n = 1.6\text{--}2.0 \text{ kg}\cdot\text{mol}^{-1}$ ,  $D = 1.2\text{--}1.4$ ). Pendant ketone functions were confirmed, opening a way to obtain hydroxyl ones for further functionalization.

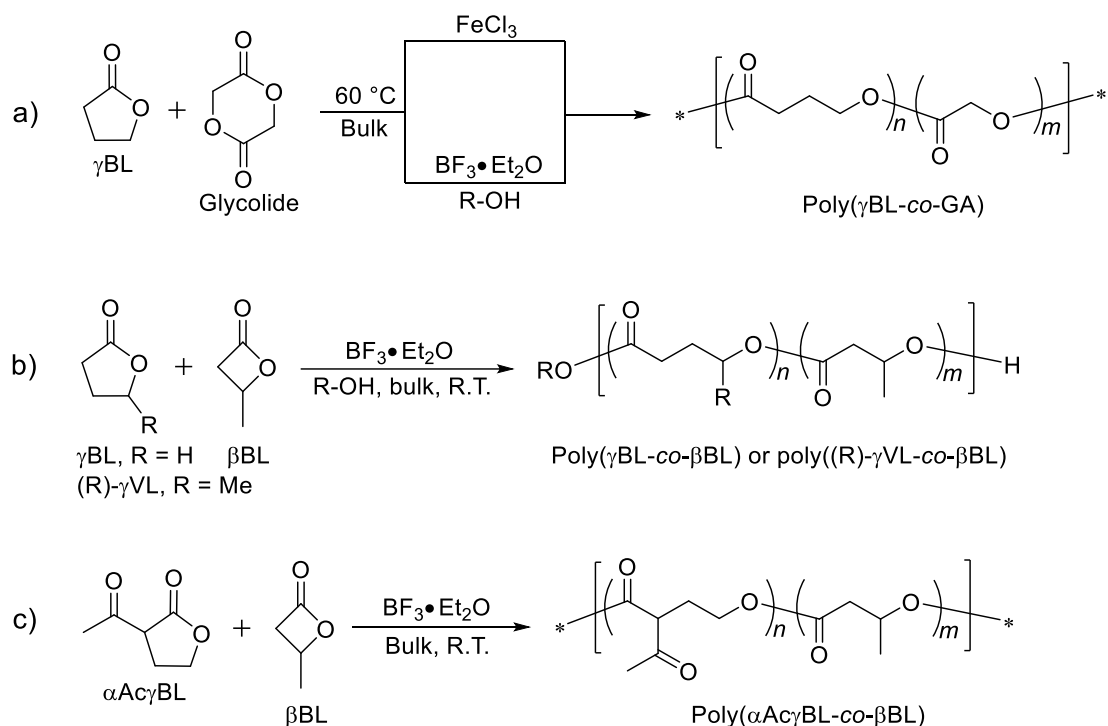

Scheme 1. Examples of Lewis acid-catalyzed ROCP of  $\gamma$ -lactones with cyclic esters:

(a)  $\gamma$ BL/glycolide [62, 63], (b)  $\gamma$ BL/(R)- $\gamma$ VL and  $\beta$ BL [64, 65], (c)  $\alpha$ Ac $\gamma$ BL and  $\beta$ BL [55].

The copolymerization of  $\gamma$ BL and L-lactide (LLA) was achieved in bulk at 120 °C for 4 days using tetraphenyl tin (Ph<sub>4</sub>Sn) [66]. Statistical copolyesters poly( $\gamma$ BL-co-LLA) were obtained with molar mass as high as 70 kg.mol<sup>-1</sup> ( $D = 1.3$ ). The maximum  $\gamma$ BL incorporation obtained was *ca.* 17%. The use of  $\gamma$ BL derivatives bearing an alkyl substitute in the  $\gamma$ -position (*i.e.*,  $\gamma$ -valerolactone ( $\gamma$ VL),  $\gamma$ -caprolactone ( $\gamma$ CL)) only produced copolymers with low  $\gamma$ VL or  $\gamma$ CL incorporation (2%). The proposed copolymerization mechanism was based on the transesterification between the fast-produced PLLA and  $\gamma$ BL. This assumption was supported by the incorporation of  $\gamma$ BL units into PLLA, starting from PLLA in the presence of  $\gamma$ BL under similar conditions

( $\overline{M}_n = 10.1 \text{ kg.mol}^{-1}$ ,  $D = 1.5$ ). The degradability of the resulting poly( $\gamma$ BL-*co*-LLA) was confirmed in H<sub>2</sub>O (70 °C, 5 days) or in the presence of lipases from *Rhizopus arrhizus* and *R. delemar* (37 °C, 24 h), which both showed enhanced degradability with the increase of  $\gamma$ BL content in the copolymer.

The Ph<sub>4</sub>Sn catalyst was further used for the ROCP of  $\gamma$ BL with other cyclic esters such as  $\beta$ PL,  $\epsilon$ -caprolactone ( $\epsilon$ CL),  $\delta$ -valerolactone ( $\delta$ VL) and glycolide [67]. Random copolymers were prepared with various  $\gamma$ BL content (3–16% for poly( $\gamma$ BL-*co*- $\epsilon$ CL) with  $\overline{M}_n = 29.5\text{--}145 \text{ kg.mol}^{-1}$ ; 3–15% for poly( $\gamma$ BL-*co*- $\delta$ VL) with  $\overline{M}_n = 18.6\text{--}52.2 \text{ kg.mol}^{-1}$ ). However, only low-molar-mass copolymers with slightly higher  $\gamma$ BL content (4–23%,  $\overline{M}_n = 1.3\text{--}2.2 \text{ kg.mol}^{-1}$ ) were produced during the copolymerization of  $\gamma$ BL with  $\beta$ PL. The copolymerization of  $\gamma$ BL and glycolide generated a mixture of insoluble parts which were glycolide-rich copolymers and soluble parts which were poly( $\gamma$ BL-*co*-glycolide) containing 3–26% of  $\gamma$ BL content. The degradation of the obtained copolymers was investigated in water at 70 °C. The degradation rate of poly( $\gamma$ BL-*co*-glycolide) was higher than that of the others, whereas the reverse was observed in the presence of lipases (37 °C).

In summary, the use of Lewis acids as catalysts for the homopolymerization of  $\gamma$ -lactones has been shown to be inefficient. Copolymerization with other cyclic monomers using boron derivatives appears to be a way to produce biodegradable materials with enhanced degradability. In general, molar masses and  $\gamma$ -BL incorporation remain low for long polymerization times.

#### 4. Brønsted acid-catalyzed ROP/ROCP of $\gamma$ -lactones

Brønsted acids such as methanesulfonic acid (MSA), diphenyl phosphate (DPP) and trifluoromethanesulfonic acid (TfOH) were utilized for ROP/ROCP of lactones and/or cyclic carbonates through activated monomer mechanism (AMM) pathway following a cationic mechanism [4, 5, 7, 68-70]. Well-defined polymers (*i.e.*, controlled molar mass, narrow distribution, and targeted macromolecular architecture) could be obtained under mild conditions. Such Brønsted acids were employed for the ROP/ROCP of  $\gamma$ BL or its functional derivatives as well.

High pressure (800–1000 MPa) was shown to achieve the ROP of  $\gamma$ BL in bulk at 40 °C, initiated by methanol with TfOH as an example [71]. The  $\overline{M}_n$  of the resulting P $\gamma$ BLs were in the range 6.4–7.9 kg.mol<sup>-1</sup> with relatively high dispersities ( $D = 1.49$ – $1.57$ ). It was proposed that the polymerization proceeded by the AMM pathway, which was based on the coordination of lactones to the acids to afford the activated cationic complex, followed by the attack of an initiator.

There is a possibility to polymerize  $\gamma$ BL above its ceiling temperature. The polymer stability should be then studied for any polymers obtained.

TfOH or DPP was also used for the polymerization of a  $\gamma$ BL derivative, *trans*-hexahydro-2(3*H*)-benzofuranone [*i.e.*, 4,5-*trans* cyclohexyl-ring-fused  $\gamma$ BL (4,5-T6L)]. Only oligomers were produced with a maximum value of 20% of monomer conversion [72, 73]. The polymerization of  $\alpha$ OH $\gamma$ BL was carried out at 90 °C using TfOH, producing oligomers with dehydration [56].

The more open copolymerization strategy was also developed with Brønsted acids. Fluorosulfonic acid (FSO<sub>3</sub>H), TfOMe and TfOH were quite helpful to copolymerize  $\gamma$ BL (or (R)- $\gamma$ VL) with different comonomers such as glycolide, 3,4-*trans* cyclohexyl-ring-fused  $\gamma$ BL (3,4-T6L) or  $\beta$ BL, allowing up to 30% of  $\gamma$ BL incorporation into low molar mass copolyester chains [62-65, 73]. Phosphoric acid (H<sub>3</sub>PO<sub>4</sub>) could also achieve the copolymerization of  $\gamma$ BL,  $\gamma$ VL or  $\gamma$ CL with  $\epsilon$ CL in bulk at 200 °C [74]. Interestingly, semi-crystalline copolymers were synthesized ( $\overline{M}_n = 17.8\text{--}41.2 \text{ kg}\cdot\text{mol}^{-1}$ ) with melting temperature ( $T_m$ ) ranging from 48 °C to 56 °C. The resulting products showed different degradation rates in acidic medium, *i.e.*, poly( $\gamma$ BL-*co*- $\epsilon$ CL) > poly( $\gamma$ VL-*co*- $\epsilon$ CL) > poly( $\gamma$ CL-*co*- $\epsilon$ CL), which may be due to the varying hydrophobicity of the copolymers bearing side chains of different lengths. Either DPP or hydrochloric acid in diethyl ether (HCl•Et<sub>2</sub>O) were used in bulk or solution, yielding poly( $\gamma$ BL-*co*- $\epsilon$ CL) with limited  $\gamma$ BL incorporation [75].

$\alpha$ -Bromo- $\gamma$ -butyrolactone ( $\alpha$ Br $\gamma$ BL), a commercial functional  $\gamma$ BL derivative, was copolymerized with other heterocyclic monomers including  $\epsilon$ CL, trimethylene carbonate (TMC), and 2-allyloxymethyl-2-ethyltrimethylene carbonate (AOMECE) [76, 77]. The ROCP proceeded in bulk at RT with DPP or MSA (Scheme 2a) [77]. Copolymers with 4–12% of  $\alpha$ Br $\gamma$ BL were obtained ( $\overline{M}_n = 17.0\text{--}31.2 \text{ kg}\cdot\text{mol}^{-1}$ ,  $D = 1.08\text{--}1.12$ ). Separated  $\alpha$ Br $\gamma$ BL units along the copolymer backbone were confirmed by <sup>13</sup>C NMR analysis (*i.e.*, no homosequence of  $\alpha$ Br $\gamma$ BL). The narrow distribution may originate from the mild reaction temperature and the intrinsic merits of organic acids, which greatly suppressed the transesterification reactions. Therefore, a triblock

copolymer, poly[( $\alpha$ Br $\gamma$ BL-*co*- $\epsilon$ CL)-*b*-AOMECE-*b*-( $\alpha$ Br $\gamma$ BL-*co*- $\epsilon$ CL)] ( $\overline{M}_n = 40.8$  kg.mol<sup>-1</sup>,  $\mathcal{D} = 1.12$ ) was synthesized in one-pot two-steps procedure, through the DPP-catalyzed sequential ROP of AOMECE and  $\epsilon$ CL/ $\alpha$ Br $\gamma$ BL with 1,6-hexanediol as the initiator. The selective incorporation of separated  $\alpha$ Br $\gamma$ BL site into the  $\alpha$ Br $\gamma$ BL/ $\epsilon$ CL block was again demonstrated. Both poly(TMC-*co*- $\alpha$ Br $\gamma$ BL) and triblock copolymer were used as macroinitiators for single electron transfer living radical polymerization (SET-LRP) of methyl acrylates, the dispersed  $\alpha$ Br $\gamma$ BL site along the polymer chain being the initiating sites. The “graft from” polymerization proceeded with good control and nearly complete initiation, resulting in well-defined poly(methyl acrylate) grafted-copolymers with degradable polymers based on  $\alpha$ Br $\gamma$ BL and  $\epsilon$ CL [76]. In the same vein, amphiphilic triblock copolymers were synthesized starting from HO-PEG-OH.

Functional copolymers of  $\alpha$ MBL and  $\epsilon$ CL were synthesized in DCM or bulk at RT using TfOH or DPP as a catalyst (Scheme 2b) [78]. Poly( $\alpha$ MBL-*co*- $\epsilon$ CL)s with 4–11%  $\alpha$ MBL incorporation ( $\overline{M}_n = 3.3$ –17.9 kg.mol<sup>-1</sup>) were obtained by TfOH-catalyzed copolymerization in DCM ( $[\alpha\text{MBL}]/[\epsilon\text{CL}] < 1$ ), while P( $\alpha$ MBL)<sub>VAP</sub> *via* vinyl-addition polymerization of  $\alpha$ MBL or cross-linked polymers P( $\alpha$ MBL)<sub>CLP</sub> were observed in other cases (*e.g.* bulk,  $[\alpha\text{MBL}]/[\epsilon\text{CL}] > 1$ ). The desired linear structure of copolyesters containing unsaturated pendant side groups with <sup>i</sup>PrO/H chain ends was confirmed by <sup>1</sup>H NMR and MALDI-TOF MS analyses. A random distribution of the two monomers was expected by the authors. However, the less reactive DPP allowed a better control of the copolymerization, resulting in the formation of copolymers with 4–11%  $\alpha$ MBL content ( $\overline{M}_n = 2.9$ –7.9 kg.mol<sup>-1</sup>). Due to the lower acidity of DPP, the copolymerization

proceeded in bulk without the appearance of  $P(\alpha\text{MBL})_{\text{VAP}}$ . The copolymers obtained showed a reduced  $T_m$  due to the presence of non-crystallizable  $\alpha\text{MBL}$  component and high thermal stability. The post-polymerization of unsaturated copolyesters poly( $\alpha\text{MBL-co-}\epsilon\text{CL}$ ) was verified by thiol-ene chemistry under thermal initiation (2,2'-azobis(2-methylpropanitrile), AIBN) or photoinitiation (2,2-dimethoxy-2-phenylacetophenone, DMPA). In addition, multihydroxyl copolymers with similar  $\alpha\text{MBL}$  content (4–8%) were synthesized in bulk by employing multifunctional alcohols such as 1,2-ethanediol or di(trimethylolpropane) as the initiator.

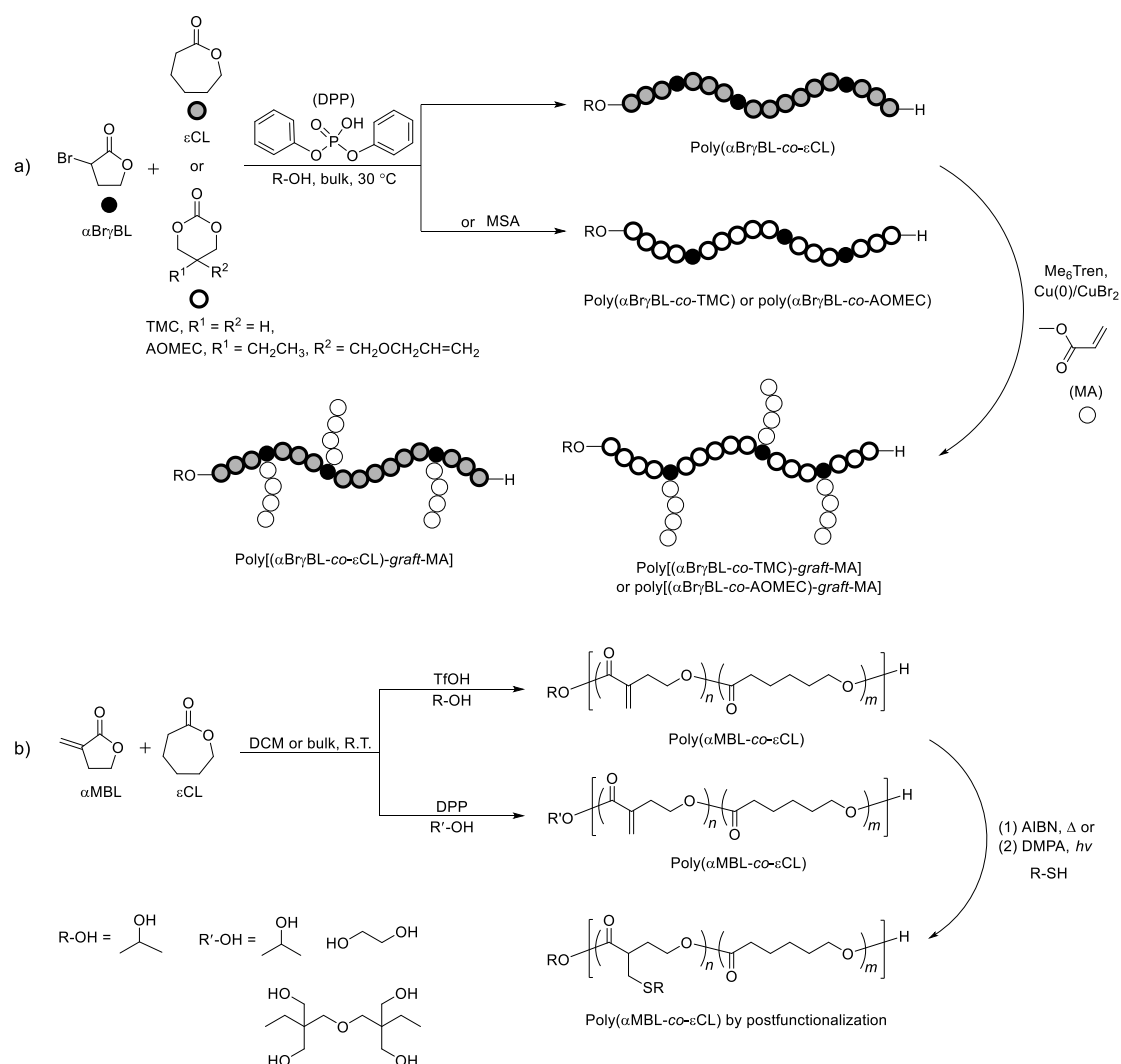

Scheme 2. Brønsted acid-catalyzed ROCP of  $\gamma$ -lactones with cyclic ester/carbonate: (a)

$\alpha$ BryBL and  $\epsilon$ CL, TMC, AOMECA [77], (b)  $\alpha$ MBL and  $\epsilon$ CL [78].

Again, the copolymerization strategy is preferred to ring-open  $\gamma$ -lactones by Brønsted acids and take benefit of specific molecular structures. Indeed, TfOH or DPP are the most efficient acids to synthesize (co)polyesters bearing reactive functions introduced by the  $\gamma$ -lactones. Adjusting the acidity of the catalyst seems to be key to minimizing side reactions. Nevertheless, molar masses and  $\gamma$ -lactones incorporation are still limited, and a controlled copolymerization cannot be achieved by this route.

## 5. Organic base-catalyzed ROP/ROCP of $\gamma$ -lactones

Organocatalytic polymerization following a nucleophilic/anionic mechanism is a powerful pathway for the synthesis of metal-free polymers with different macromolecular architectures. Since the first report of nucleophilic organocatalyzed ROP of lactide [79] or cyclic monomers [80], several reviews focusing on this subject have been published [4, 7, 69, 81-88], including on initiating/catalytic systems for the polymerization of  $\gamma$ BL and derivatives.

Different organic bases such as NHCs (*e.g.* IMes), guanidines (*e.g.* TBD), and phosphazene bases including *t*-BuP<sub>2</sub> and *t*-BuP<sub>4</sub> were used for the ROP of  $\gamma$ BL. The superbase *t*-BuP<sub>4</sub> was revealed to be the most efficient catalyst (Scheme 3a) [21, 22]. The polymerization was carried out in tetrahydrofuran (THF) at a high monomer concentration ( $[\gamma\text{BL}]_0 = 10 \text{ M}$ ) and a low reaction temperature ( $-40 \text{ }^\circ\text{C}$ ) below  $T_c$ , which is  $22 \text{ }^\circ\text{C}$  for  $\gamma$ BL in bulk [15]. Two different polymerization mechanisms were proposed,



depending on the presence of an alcohol as the initiator or not. In absence of an alcohol,  $\gamma$ BL can be directly deprotonated by the superbases to produce a reactive enolate species. This results in a mixture of linear P $\gamma$ BL with acylated lactone/H chain ends (P $\gamma$ BL<sub>LL1</sub>) and cyclic P $\gamma$ BL (P $\gamma$ BL<sub>C</sub>), the latter was believed to be achieved by a back-biting reaction of the polymer chain ( $\overline{M}_n = 9.2\text{--}26.4 \text{ kg}\cdot\text{mol}^{-1}$ ,  $D = 1.16\text{--}1.79$ ). The addition of an alcohol (*e.g.*, benzyl alcohol, BnOH; [*t*-BuP<sub>4</sub>]/[BnOH] = 1/0.5–1/1.5) was a more rapid and efficient pathway for the formation of relatively high molar mass polymers in high conversion (up to 90% in 4 h,  $\overline{M}_n$  up to 27.1 kg $\cdot$ mol<sup>-1</sup>,  $D = 2.11$ ). In this case, a mixture of P $\gamma$ BL<sub>LL1</sub> and linear P $\gamma$ BL with BnO/H chain ends (P $\gamma$ BL<sub>LL2</sub>) was obtained. It was considered that the presence of alcohols led to more stabilized propagating alkoxide chain ends ([BnO<sup>-</sup>/*t*-BuP<sub>4</sub>H<sup>+</sup>]), which also accounted for the more controlled polymerization behaviour. The absence of P $\gamma$ BL<sub>C</sub> under this condition was not explained. Moreover, the weaker phosphazene base *t*-BuP<sub>2</sub> showed lower activity under the same conditions, whereas the weakest *t*-BuP<sub>1</sub> was inactive.

The ROP of  $\gamma$ BL was also performed in the presence of a cyclic trimeric phosphazene base (CTPB) as the catalyst [23]. The polymerization was conducted in toluene at -50 °C with a slightly lower monomer concentration ([ $\gamma$ BL]<sub>0</sub> = 6 M) (Scheme 3a). Compared to the superbases *t*-BuP<sub>4</sub>, CTPB was proved to be inactive in absence of an alcohol. The use of CTPB with BnOH as the initiator selectively afforded well-defined linear P $\gamma$ BL<sub>LL2</sub> with a high monomer conversion (up to 98% in 4 h,  $\overline{M}_n = 10.5\text{--}22.9 \text{ kg}\cdot\text{mol}^{-1}$ ,  $D = 1.27\text{--}1.72$ ). The polymerization mechanism was similar to that proposed in *t*-BuP<sub>4</sub>/BnOH catalytic system, *i.e.*, the loose ion pair [BnO<sup>-</sup>/CTPBH<sup>+</sup>]

could polymerize  $\gamma$ BL. The relative lower basicity of CTPB ( $pK_a^{\text{MeCN}} = 33.3$ ) compared to  $t$ -BuP<sub>4</sub> ( $pK_a^{\text{MeCN}} = 42.6$ ) may account for the selective production of linear polymer with BnO/H chain ends (P $\gamma$ BL<sub>L2</sub>) in this case.

Recently, *N*-heterocyclic olefins (NHOs) were utilized for the polymerization of  $\gamma$ BL in bulk at -36 °C [24]. A mixture of linear and cyclic polyesters (P $\gamma$ BL<sub>L2</sub> + P $\gamma$ BL<sub>C</sub>) ( $\overline{M}_n = 3.3\text{--}7.2 \text{ kg}\cdot\text{mol}^{-1}$ ,  $\mathcal{D} = 1.5\text{--}2.1$ ) was obtained only when an initiator (BnOH) was initially added. The zwitterionic ROP of  $\gamma$ BL with NHOs alone was completely suppressed (Scheme 3a).

Organic bases were also used for the ROP of  $\gamma$ BL derivatives such as  $\alpha$ BryBL and 4,5-T6L. DBU, TBD or  $t$ -BuP<sub>2</sub> were ineffective for the ROP of  $\alpha$ BryBL in bulk at RT, due to the elimination of the bromine atom under such conditions [77]. Several organic bases were also tested for the polymerization of 4,5-T6L performed in bulk with different temperatures [72, 73]. For instance, the attempts to utilize DBU or BEMP in presence of alcohols at RT were unsuccessful. Only 5% of monomer conversion was observed with  $t$ -BuP<sub>4</sub> after 24 h under such conditions, while IMes led to 20% monomer conversion after 96 h. TBD/BnOH could mediate well-controlled polymerization of 4,5-T6L ( $\overline{M}_n = 9.1 \text{ kg}\cdot\text{mol}^{-1}$ ,  $\mathcal{D} = 1.11$ ). The monomer conversion was limited to 64% due to the polymerization-depolymerization equilibrium. However, cyclic P(4,5-T6L)s with  $\overline{M}_n = 40.6\text{--}72.1 \text{ kg}\cdot\text{mol}^{-1}$  and  $\mathcal{D} = 1.21\text{--}1.30$  were synthesized in bulk at RT in the presence of less sterically hindered NHCs alone (*e.g.* I<sup>*t*</sup>Bu and I<sup>*i*</sup>Pr) (Scheme 3b) [73]. DBU, Et<sub>3</sub>N or DMAP were inactive for the ROP of 4,5-T6L in bulk at 40 °C [72].

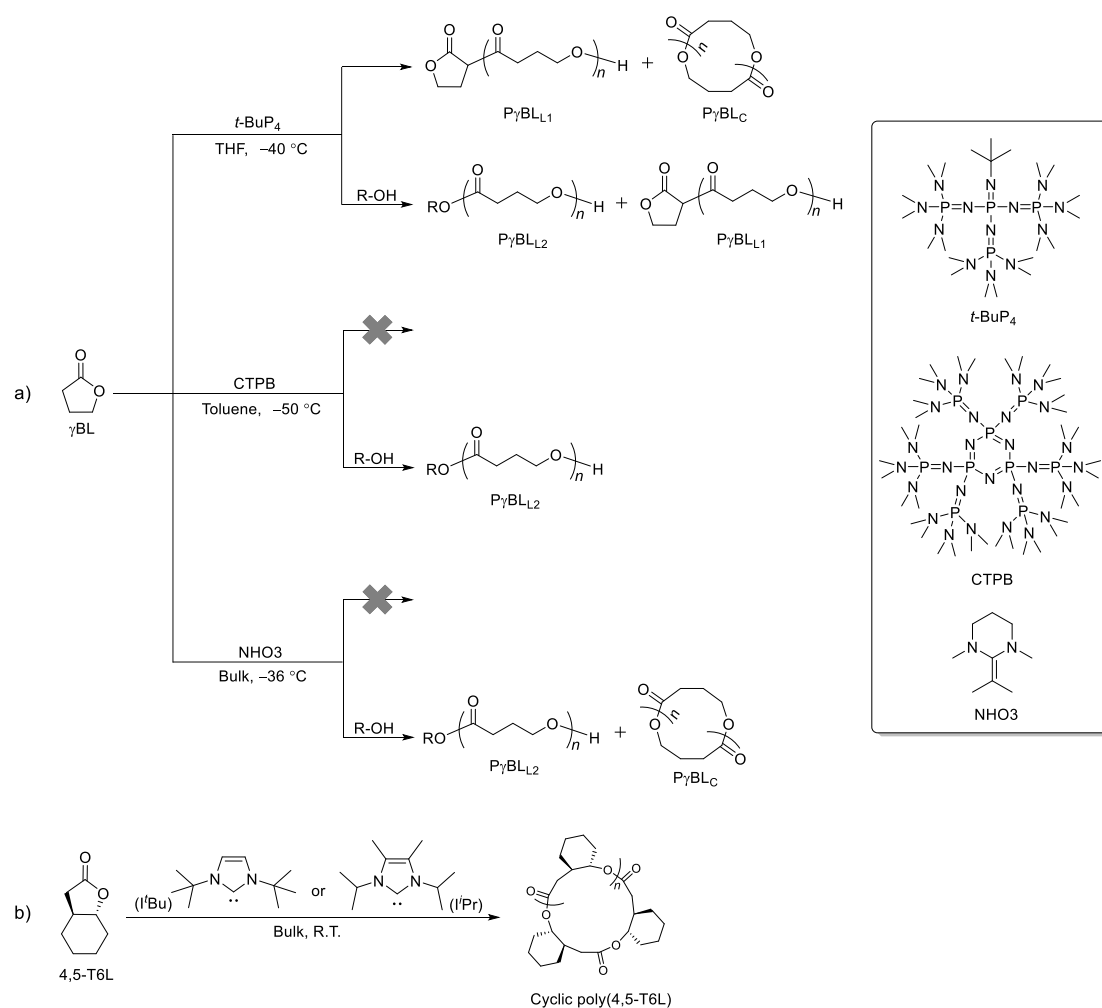

Scheme 3. (a) ROP of  $\gamma$ -lactones by different organic bases:  $t$ -BuP<sub>4</sub> [22], CTPB [23] and NHO<sub>3</sub> [24] (up to down, respectively), (b) ROP of 4,5-T6L by NHCs [73].

Recently, organic bases such as  $I^t$ Bu and  $I^t$ Pr,  $t$ -BuP<sub>4</sub> and DABCO were tested for the polymerization of  $\beta$ AL, 3-methylfuran-2(5*H*)-one (3-MFO), and their parent monomer 2(5*H*)-furanone (FO) [89]. Only vinyl-addition poly(2(5*H*)-furanone)s ( $\overline{M}_n = 1.57\text{--}2.06 \text{ kg}\cdot\text{mol}^{-1}$ ) and compounds with dimer or trimer structures (corresponding to  $\beta$ AL, 3-MFO, respectively) were obtained, no matter the catalyst and the reaction conditions (*e.g.*, solvent, temperature, initiator). Noteworthy, tri-functional monomers

such as  $\beta$ -hydroxy- $\alpha$ -methylene- $\gamma$ -butyrolactone ( $\beta$ HMBL or Tulipalin B) and 3-(hydroxymethyl) furan-2(5*H*)-one (3-HMFO) were also polymerized in solution using organocatalysts such as TPT, *i*Bu and *t*-BuP<sub>4</sub>. The resultant products were considered as branched copolymers with various structures, originating from the multiple types of reactions and the relevant mechanistic crossovers [89, 90].

Eventually, some organic bases appear to be efficient catalysts for the homopolymerization of  $\gamma$ BL and derivatives using the ring-opening mechanism, preferably with an alcohol as the initiator. High monomer conversion can be reached in short time with phosphazene bases.

To go further with this approach, the ROCP of  $\gamma$ BL with  $\epsilon$ CL or  $\delta$ VL was studied in the presence of *t*-BuP<sub>4</sub>/BnOH (1/1) (Scheme 4a) [91]. The copolymerization was carried out in THF at 25 °C or low reaction temperatures (-40 or -20 °C) with a relatively low molar ratio of [ $\gamma$ BL]/[ $\epsilon$ CL] (3 or 4/1) or [ $\gamma$ BL]/[ $\delta$ VL] (1, 3 or 10/1). The resultant random copolymers showed high  $\gamma$ BL incorporation, 42–80% for poly( $\gamma$ BL-*co*- $\epsilon$ CL) ( $\overline{M}_n$  = 5.2–26.0 kg.mol<sup>-1</sup>,  $\overline{D}$  = 1.35–1.91) and 19–75% for poly( $\gamma$ BL-*co*- $\delta$ VL) ( $\overline{M}_n$  = 5.3–20.7 kg.mol<sup>-1</sup>,  $\overline{D}$  = 1.49–1.88).

The use of a comonomer facilitates an increase of the polymerization temperature above the ceiling temperature.

The introduction of  $\gamma$ BL influenced the thermal properties and co-crystallization behaviour of the copolyesters. For example, poly( $\gamma$ BL-*co*- $\epsilon$ CL)s showed unique eutectic phase behaviour, with an eutectic temperature of 11 °C at 66%  $\gamma$ BL incorporation. Such poly( $\gamma$ BL-*co*- $\epsilon$ CL) copolyesters (with  $\gamma$ BL content up to 28%) were

also produced with TBD as catalyst in bulk or solution [75]. With the same catalyst, using PEG-OH as a macroinitiator, amphiphilic diblock copolymers with random comonomer distribution of  $\gamma$ BL and  $\epsilon$ CL in the polyester block were also synthesized.

Furthermore, diblock copolymers of  $\gamma$ BL and LLA were achieved using CTPB *via* one-pot two-steps sequential ROP of  $\gamma$ BL and LLA (Scheme 4b) [92]. The formation of poly( $\gamma$ BL-*b*-LLA)s with high  $\gamma$ BL amount (up to 52%) was obtained ( $\overline{M}_n = 6.5\text{--}20.5$  kg.mol<sup>-1</sup>,  $D = 1.45\text{--}2.09$ ). All block copolymers displayed two  $T_m$ , the lower temperature (*ca.* 56 °C) was attributed to the  $T_m$  of P $\gamma$ BL block and the higher one (*ca.* 165 °C) was attributed to the  $T_m$  of PLLA block. The block copolymers also showed enhanced thermal stability compared to P $\gamma$ BL ( $T_d \geq 284$  °C *vs* 240 °C), which could be further improved with the increase of PLLA block length. Using  $\epsilon$ CL or  $\delta$ VL as the second monomer only led to the formation of random copolymers, which was also observed in the sequential ROP of  $\omega$ PDL and LLA/ $\epsilon$ CL/ $\delta$ VL [93]. Amphiphilic block copolymers PEG-*b*-P $\gamma$ BL could also be obtained starting from monohydroxy-terminated poly(ethylene glycol) (PEG-OH) and self-assemble to micelles and vesicles in water, indicating their potential for drug delivery carriers [94].

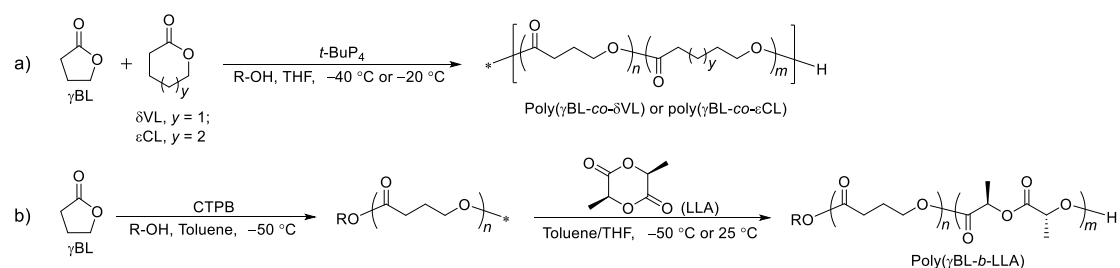

Scheme 4. (a) ROCP of  $\gamma$ BL with  $\epsilon$ CL or  $\delta$ VL [91], (b) sequential ROP of  $\gamma$ BL and LLA

[92].

Organic phosphines, including  $\text{PPh}_3$ ,  $\text{P}^n\text{Bu}_3$  and  $\text{PCy}_3$ , were employed as initiator/catalysts in the zwitterionic copolymerization of bicyclic bis( $\gamma$ -butyrolactone)s (BBLs) and glycidyl phenyl ether (GPE) performed in THF at 120 °C, generating polyesters with alternating sequence structures due to suppression of back-biting reactions. [95-97]. These monomer structures will be discussed further in section 6.

Looking at the possibility to prepare copolymers based on  $\gamma$ -lactones with mainly other lactones, lactides or epoxides, organic bases and in particular phosphazene bases are efficient systems permitting high molar masses and  $\gamma$ -BL incorporation under mild conditions. Properties of such copolymers only start to be investigated and will be developed in a near future, in particular, because of the possibility to introduce reactive functions via the  $\gamma$ -lactones.

## 6. Alkali metal compound-catalyzed ROP/ROCP of $\gamma$ -lactones

The early investigation of ROP of  $\gamma$ BL was conducted in bulk at 80 °C for 12 months in the absence/presence of potassium carbonate ( $\text{K}_2\text{CO}_3$ ). No polymer was produced [16]. When the polymerization of  $\gamma$ BL was performed with *t*-BuOK in bulk at 40 °C under high pressure (800 MPa), once again no P $\gamma$ BL was obtained[71]. However, the bulk ROP of  $\gamma$ BL was shown to proceed at -40 °C with sodium or potassium methoxides (MtOMe) following an anionic mechanism to yield P $\gamma$ BLs ( $\overline{M}_n = 9.2\text{--}14.0 \text{ kg}\cdot\text{mol}^{-1}$  and  $D = 1.65\text{--}2.17$ ) with low monomer conversion ( $\leq 25\%$ ) after 4

h. Block copolymers containing  $\gamma$ BL were also synthesized. For example, with potassium methoxide (KOMe) or sodium hydride (NaH) in DCM/THF at  $-50\text{ }^{\circ}\text{C}$  ( $[\gamma\text{BL}]_0 = 6\text{ M}$ ), PEG-OH was used as a macroinitiator to yield amphiphilic block copolymers PEG-*b*-P $\gamma$ BL with  $\overline{M}_n = 5.8\text{--}12.8\text{ kg.mol}^{-1}$  [94].

Sodium hydroxide (NaOH) or sodium *n*-butoxide (*n*-BuONa) were used for the ROP of  $\alpha$ AL, and only oligomers were produced at RT, despite a  $T_c$  estimated at  $152\text{ }^{\circ}\text{C}$  [98-100].

When the five-membered lactone is fused to other cyclic substitutes, the ring strain of this compound changes and thus the monomer may become more polymerizable in some cases. Therefore, the polymerization of substituted  $\gamma$ BL derivatives such as spirocyclic  $\gamma$ -butyrolactone (SBL), 4,5-T6L and its *cis* isomer (4,5-C6L) were investigated [72, 101].

The ROP of SBL was investigated with *t*-BuOK or methyllithium (MeLi) at RT in THF (Scheme 5a) [101]. Polyesters with moderate molar masses ( $\overline{M}_n = 6.5\text{--}10.0\text{ kg.mol}^{-1}$ ,  $D = 1.13\text{--}1.59$ ) were obtained, which may be due to the tandem double ring-opening reaction that involves an isomerization. The successful ROP of SBL also indicated that the increased ring strain of spirocyclic skeleton would reduce the degree of back-biting.

*t*-BuOK was also used for the homopolymerization of 4,5-T6L in bulk at  $40\text{ }^{\circ}\text{C}$  (Scheme 5b) [72]. The resultant product showed moderate molar mass and relatively broad distribution ( $\overline{M}_n = 5.0\text{ kg.mol}^{-1}$ ,  $D = 1.62$ ). Other anionic initiators with a stronger basicity such as *n*-butyllithium (*n*-BuLi) and lithium diisopropylamide (LDA) were also

efficient under the same conditions, leading to the synthesis of the corresponding polyesters with similar molar masses as observed with *t*-BuOK [73]. Meanwhile, the polymerization of its *cis* isomer (4,5-C6L) with the same anionic systems was unsuccessful, highlighting the contribution of the *trans*-fused cyclohexane for the improved polymerizability of 4,5-T6L [73].

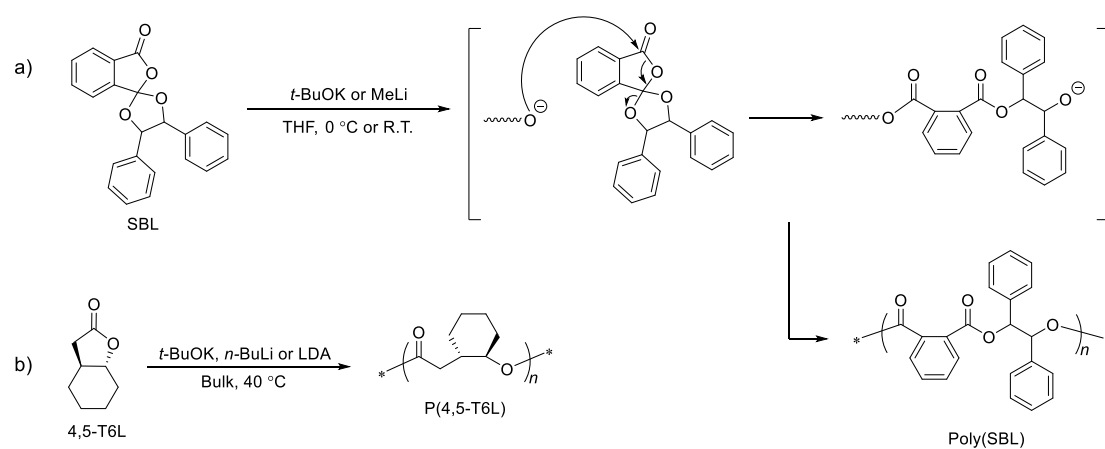

Scheme 5. Alkali metal-catalyzed/initiated polymerization of  $\gamma$ BL derivatives: (a) ROP of SBL [101], (b) ROP of 4,5-T6L [72].

The copolymerization strategy was also employed here. The random copolymerization of  $\gamma$ BL and  $\epsilon$ CL was conducted with LDA in dioxane at 25 °C, producing copolymers with 26% of  $\gamma$ BL incorporation [102]. While the ROP of bicyclic  $\gamma$ -butyrolactones was yielding only oligomers [103, 104], the copolymerization of bicyclic or spirocyclic bis( $\gamma$ -lactone)s (e.g., BBL1–9, S-BBL1–3 and spirocyclic bis( $\gamma$ -butyrolactone)s (SBBL) with GPE was investigated (Scheme 6) [95, 97, 105-109]. More particularly, the copolymerization of bicyclic bis( $\gamma$ -lactone) bearing methyl group



(BBL1) and GPE was conducted in THF at 120 °C with *t*-BuOK as an initiator/catalyst [105, 106, 108]. The copolymerization was facilitated by the double ring-opening reaction of BBL1 that formed a ketone moiety in the polymer side chain, thus preventing the depolymerization reaction which would induce the reformation of stable five-membered lactones. The resultant copolymers show moderate molar masses ( $\overline{M}_n = 4.6\text{--}8.2 \text{ kg}\cdot\text{mol}^{-1}$ ) and relatively low dispersities ( $D = 1.20\text{--}1.30$ ). Linear alternating copolymers with  $\alpha,\omega$ -alkoxide/H chain ends, linear copolymers with  $\alpha,\omega$ -carboxyl chain terminals and cyclic alternating ones were obtained [109].

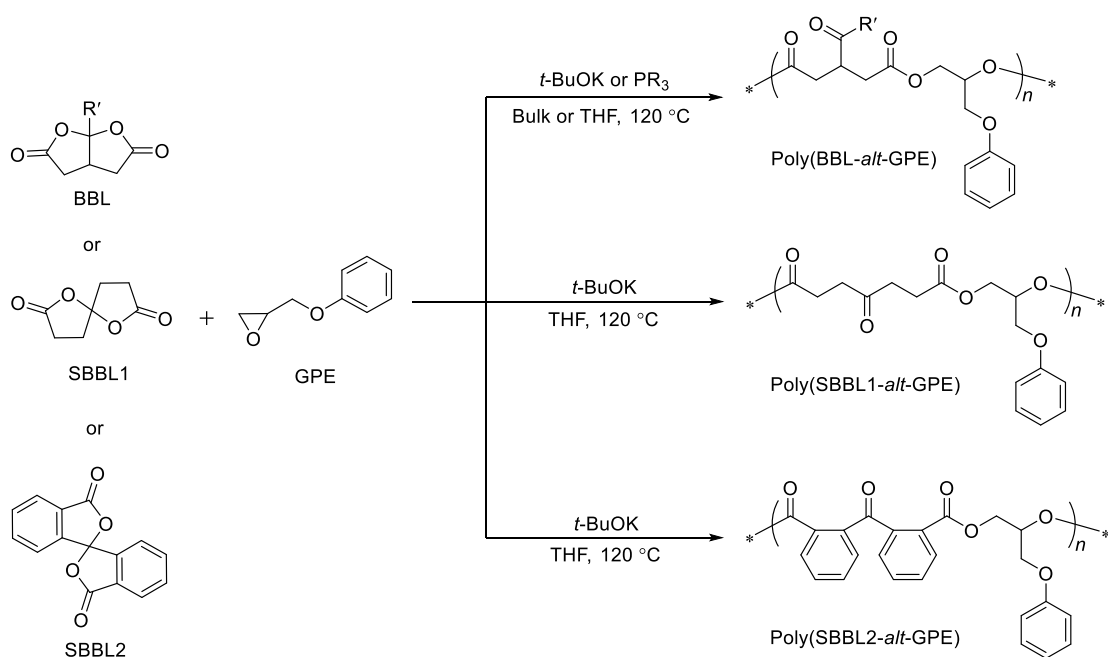

BBL,  $R' = \text{Me, Et, Pr, }^i\text{Pr, Ph, C}_6\text{H}_2(\text{OMe})_3, \text{CH}_2\text{OPh, CH}(\text{CH}_3)=\text{CH}_2, \text{CH}_2\text{Cl}$   
 $\text{PR}_3, R = \text{Ph, }^n\text{Bu, Cy}$

Scheme 6. Alkali metal compound-catalyzed/initiated ROCP of BBLs/SBBLs with GPE [105-110].

The scope of this alternating copolymerization system could be expanded to

various BBL derivatives bearing different substitutes and diverse epoxides, including propylene oxide (PO), styrene oxide (SO) *etc.* (see cyclic ethers in Figure 3) [107, 108, 110, 111]. All the copolymers obtained showed a strictly alternating monomeric sequence distribution, with  $\overline{M}_n = 1.3\text{--}7.6 \text{ kg}\cdot\text{mol}^{-1}$ ,  $D = 1.05\text{--}1.62$ . On the other hand, using SBBL as the comonomer also led to similar results, producing alternating polyesters [108]. In addition, polyfunctional epoxides such as poly(glycidyl methacrylate) (PGM) and poly(4-(glycidyl methyl)styrene) (PGMS) can also be copolymerized with BBLs or SBBLs under the same conditions, producing cross-linked copolymers [107, 111]. Moreover, it was shown that the volume shrinkage during cross-linking of epoxy groups containing polymers can be considerably suppressed by such alternating copolymerization. Furthermore, the alternating copolymerization of BBLs and bifunctional epoxides such as diglycidyl ether bisphenol A (DGEBA) and diglycidyl ether bisphenol S (DGEBS) showed similar volume shrinkage effect [110].

All research based on alkali metal compound-catalyzed ROP/ROCP of  $\gamma$ -lactones follow an anionic mechanism and are related to the ones carried out with organic bases. Results follow the same trend but appear less convincing, due to limited efficiencies for some monomers depending on the ring strain. Only monometallic catalysts were used, and a fine tuning of the reactivity of the active centers by using multi-metallic systems might be a way of improvement. Nevertheless, new copolymers were prepared showing the possibilities to copolymerized those  $\gamma$ -lactones to other cyclic monomers.

## 7. Organometallic compound-catalyzed ROP/ROCP of $\gamma$ -lactones

Metal-based catalysts are employed for the ROP/ROCP or stereoselective ROP of cyclic esters to obtain corresponding (bio)degradable polyesters [112-116] following a coordination/insertion mechanism. Several metal-based compounds were also used for the ROP/ROCP of  $\gamma$ BL and derivatives. For instance, P $\gamma$ BL with  $\overline{M}_n$  of 3 kg.mol<sup>-1</sup> and slightly high dispersity ( $D = 1.36$ ) was produced using scandium(III) trifluoromethanesulfonate (Sc(OTf)<sub>3</sub>) with methanol as the initiator under harsh conditions (800 MPa, 40 °C) [71]. Oligomers with dehydration of  $\alpha$ OH $\gamma$ BL was produced in presence of Sc(OTf)<sub>3</sub> at 40–80 °C [56].

More recently, La[N(SiMe<sub>3</sub>)<sub>2</sub>]<sub>3</sub> allowed the polymerization of  $\gamma$ BL at high monomer concentration ( $[\gamma\text{BL}]_0 = 10 \text{ M}$ ) and -40 °C (Scheme 7a) [21]. In absence of protic species (*i.e.*, alcohols) as the initiator (sometimes also referred to chain transfer agent (CTA)), Ln[N(SiMe<sub>3</sub>)<sub>2</sub>]<sub>3</sub> alone could polymerize  $\gamma$ BL with low yields (up to 3%) to produce both linear P $\gamma$ BL with MeO/H as the  $\alpha,\omega$ -chain ends (P $\gamma$ BL<sub>L3</sub>) and cyclic P $\gamma$ BL (P $\gamma$ BL<sub>C</sub>). The latter was presumably formed by the intramolecular back-biting reaction. Other Ln analogues gave similar results with a small decrease of the activity when the Ln ionic radius is varied (La > Sm > Y). However, the most efficient way was to generate metal alkoxides using the combination of alcohols and La[N(SiMe<sub>3</sub>)<sub>2</sub>]<sub>3</sub> by *in situ* alcoholysis to obtain P $\gamma$ BL with high molar mass in high yields. The initial molar ratio of La/PhCH<sub>2</sub>OH (BnOH) had an obvious effect on the polymer structures. When the feed ratio of La/BnOH = 1/1, linear P $\gamma$ BL with BnO/H chain ends (P $\gamma$ BL<sub>L2</sub>) was the major product with the presence of minor P $\gamma$ BL<sub>L3</sub> and P $\gamma$ BL<sub>C</sub> ( $\overline{M}_n = 10.2\text{--}11.8 \text{ kg.mol}^{-1}$ ,  $D = 2.17\text{--}2.23$ ). As the ratio of La/BnOH increased to 1/3, P $\gamma$ BL<sub>L2</sub> became

predominant and P $\gamma$ BL<sub>L3</sub>/P $\gamma$ BL<sub>C</sub> were negligible ( $\overline{M}_n = 5.4\text{--}6.5 \text{ kg}\cdot\text{mol}^{-1}$ ,  $D = 1.26\text{--}1.38$ ), indicating that most of the polymeric chains were obtained through the insertion of monomer into BnO–La bond. In general, P $\gamma$ BLs displayed two  $T_m$ , in which the lower one (*ca.* 52 °C) was attributed to the  $T_m$  of the P $\gamma$ BL<sub>C</sub> and the higher one (*ca.* 63 °C) was attributed to the  $T_m$  of the linear polymer. Moreover, both the  $T_d$  and maximum degradation temperature ( $T_{max}$ ) of the P $\gamma$ BL<sub>C</sub> (273 °C, 334 °C, respectively) was about 70 °C higher than that of the linear ones (202 °C, 225 °C, respectively), which was consistent with the hypothesis that the thermal stability of the cyclic polymer without chain ends is generally higher than that of the linear analogue [117]. Linear telechelic P $\gamma$ BLs with different termination chain ends were synthesized by the post-polymerization chain-end capping process [118]. Compared with the uncapped P $\gamma$ BL, chain-end capped P $\gamma$ BL–OR with similar molar masses significantly enhanced the  $T_d$  value by 55, 65, 78, and 112 °C for R = \*–C(=O)Ph, \*–C(=O)CH=CH<sub>2</sub>, \*–C(=O)Me, and \*–SiMe<sub>2</sub>CMe<sub>3</sub>, respectively. The resultant P $\gamma$ BL–OR also showed enhanced resistance toward hydrolytic degradation, especially in basic medium. On the other hand, the thermal transition temperatures, thermal recyclability, and dynamic mechanical behaviour of the resulting polyesters were hardly influenced by the chain-end capping.

Functional  $\gamma$ BL derivatives such as tulipalin A ( $\alpha$ MBL) which contains a highly reactive exocyclic C=C bond, was also polymerized in a ring-opening pathway for the synthesis of unsaturated and degradable polyesters (Scheme 7b) [119]. The combination of La[N(SiMe<sub>3</sub>)<sub>2</sub>]<sub>3</sub> and alcohols (La/ROH = 1/3) or Y1a, Y1k alone proved to be the

best catalytic systems for the ROP of  $\alpha$ MBL performed in THF at  $-60\text{ }^{\circ}\text{C}$  ( $[\alpha\text{MBL}]_0 = 5\text{ M}$ ). La alone led to the formation of vinyl-addition polymerization product  $\text{P}(\alpha\text{MBL})_{\text{VAP}}$ , while lower amount of alcohols (*e.g.*,  $\text{La}/\text{ROH} = 1/1$ ) produced cross-linked polymers  $\text{P}(\alpha\text{MBL})_{\text{CLP}}$ . Interestingly, it was shown by density functional theory (DFT) calculation that the observed chemoselectivity was due to the steric bulkiness of the  $^*\text{-N}(\text{SiMe}_3)_2$  groups that would lead to the VAP process, while the  $\text{La-OR}$  group favoured the ROP one. Unsaturated  $\text{P}(\alpha\text{MBL})_{\text{ROP}}$  with  $\overline{M}_n = 4.6\text{--}10.4\text{ kg}\cdot\text{mol}^{-1}$  and  $\mathcal{D} = 1.15\text{--}1.45$  were obtained with a ratio  $\text{La}/\text{ROH} = 1/3$  for various alcohols.

$\text{La}[\text{N}(\text{SiMe}_3)_2]_3$ , Y1a or (BDI)ZnO<sup>*i*</sup>Pr (Zn1) complexes were employed for the polymerization of 3,4-T6L in bulk at RT [120]. Different macromolecular structures with various and high molar masses were obtained depending on the conditions used (Scheme 7c). One can note that a zinc catalyst (*i.e.* Zn1) showed good performances in terms of polymerization activity and polymer dispersity ( $\overline{M}_n = 27.1\text{--}588\text{ kg}\cdot\text{mol}^{-1}$ ,  $\mathcal{D} = 1.01\text{--}1.02$ ). The  $T_d$  and  $T_{\text{max}}$  of the resulting linear polyesters ( $316\text{ }^{\circ}\text{C}$ ,  $390\text{ }^{\circ}\text{C}$ , respectively) obtained by  $\text{La}/\text{ROH}$  catalytic system were much higher than that of  $\text{P}\gamma\text{BL}$  ( $202\text{ }^{\circ}\text{C}$ ,  $225\text{ }^{\circ}\text{C}$ , respectively), which demonstrated the positive effect of substitutes on the thermal properties of the corresponding polymer. In addition, the formation of nanocrystalline stereocomplexes of the two enantiomeric isotactic polymers (1:1) was observed and showed increased crystallinity, crystallization rate and solvent resistance as compared to the parent enantiomers.

Recently, commercial and simple organomagnesium compounds such as dialkylmagnesium (*n*-Bu<sub>2</sub>Mg, *n*-BuEtMg *etc.*) were used as catalysts for the

polymerization of 3,4-T6L and its enantiomers, forming linear polyesters with well-defined moderate molar masses in bulk at RT [121].

Similarly, and taking benefit of this coordination-insertion mechanism, stereoselective ROP of *racemic*-3,4-cyclohexyl-ring fused  $\gamma$ -butyrolactone (*rac*-CBL) [122] using achiral yttrium complexes bearing *N,O* tetradentate ligands (Y1a, Y1i, Y1j, Y3 *etc.*) could be achieved. The tethered donor sidearm of Y catalysts induced a switch from heteroselectivity to isoselectivity *via* a chain-end control mechanism. The ROP of *rac*-CBL by Y1a with the  $\beta$ -OMe side group alone or combined with alcohols produced heterotactic PCBL (*ht*-PCBL) ( $\overline{M}_n = 18.6\text{--}102 \text{ kg.mol}^{-1}$ ,  $\overline{D} = 1.02\text{--}1.34$ ). The coordination-insertion polymerization by more sterically hindered Y1i and Y1j with the  $\beta$ -NMe<sub>2</sub> side group afforded crystalline isotactic *it*-PCBL ( $\overline{M}_n = 2.83 \text{ kg.mol}^{-1}$ ,  $\overline{D} = 1.04$ , probability of *meso* enchainment ( $P_m$ ) = 0.95), with a  $T_m$  up to 171 °C. Meanwhile, the ROP of 4,5-T6L, a constitutional isomer of 3,4-T6L, was also investigated (Scheme 7d) [123]. Similar results were observed and poly(4,5-T6L-*b*- $\epsilon$ CL) block copolymers were prepared.

This approach confirmed the expected possible stereoregulation for such  $\gamma$ -lactones, permitting control of the polymer tacticity and therefore the related properties.

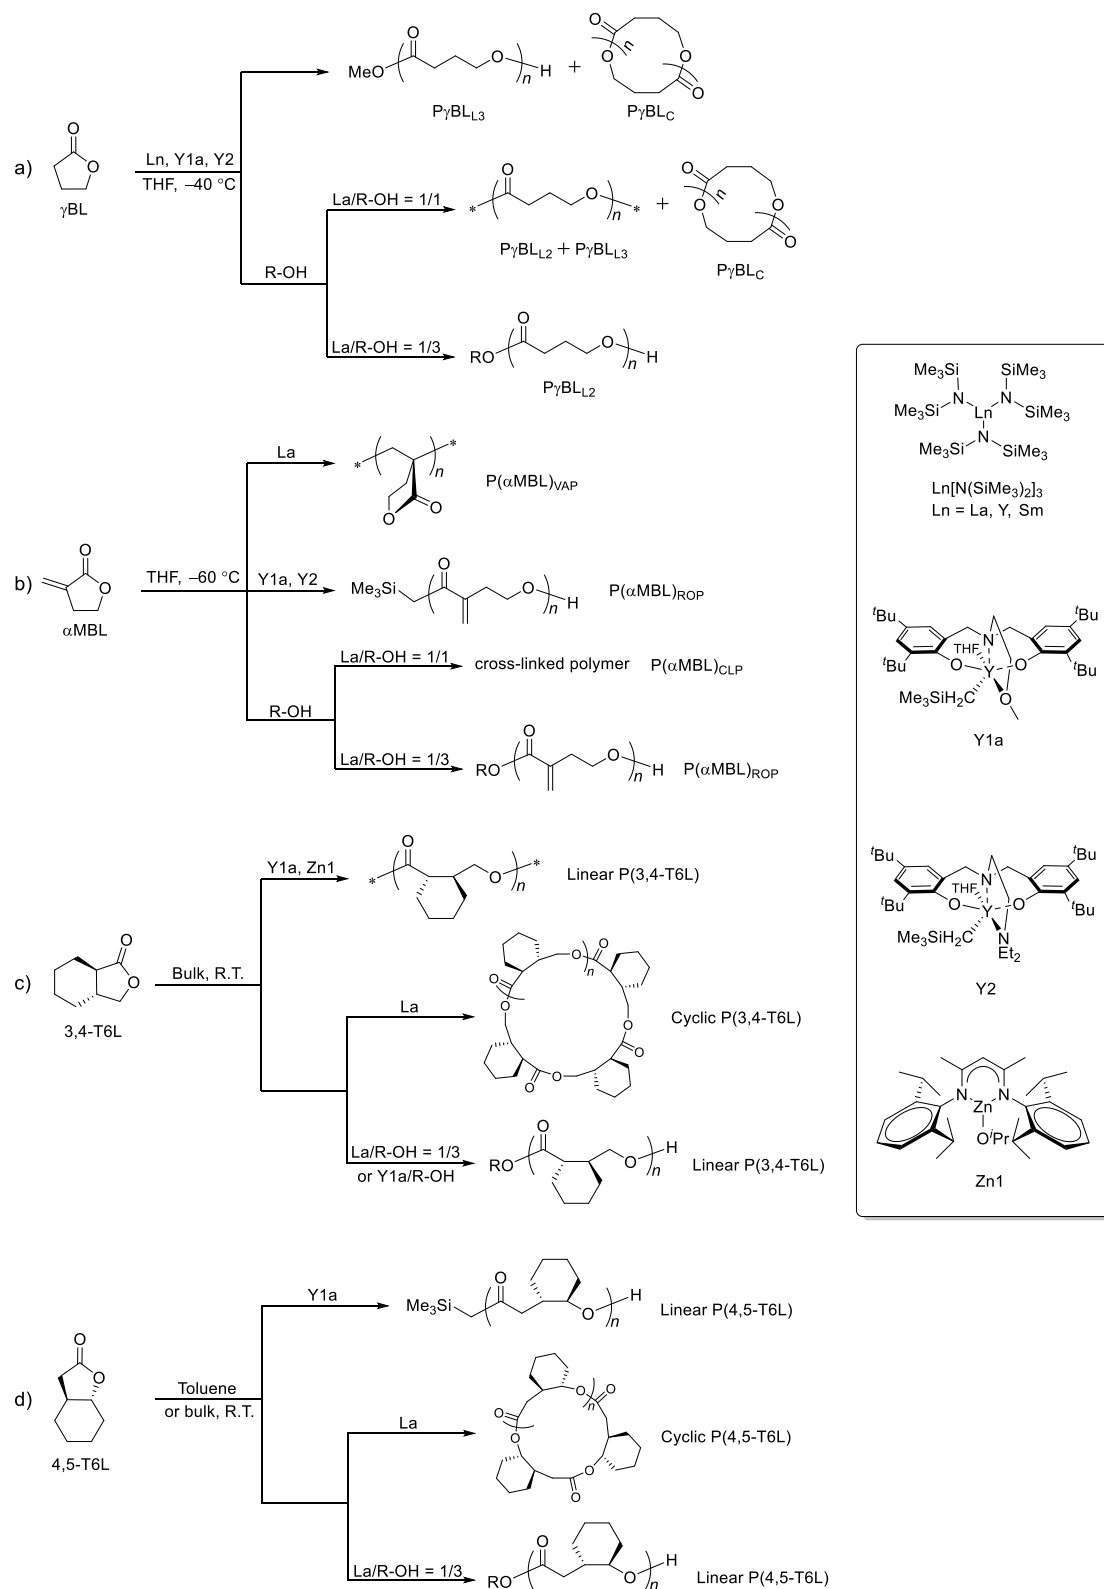

Scheme 7. Examples of ROP of  $\gamma$ -lactones by coordination-insertion mechanism: (a)  $\gamma$ BL [21], (b)  $\alpha$ MBL [119], (c) 3,4-T6L [120], (d) 4,5-T6L [123].

As already mentioned, ROCP of  $\gamma$ BL or its derivatives and other cyclic monomers with high ring-strain energy (*e.g.*, lactones, cyclic ether) is a different way to circumvent the “non-polymerizability” of  $\gamma$ BL and to tune the properties of polymers.

Many catalytic systems (*e.g.* Sc(OTf)<sub>3</sub>, Al(O<sup>*i*</sup>Pr)<sub>3</sub>, La[N(SiMe<sub>3</sub>)<sub>2</sub>]<sub>3</sub>, Sn complexes, Sm(OAr)<sub>2</sub>(THF)<sub>3</sub> or aluminum Schiff’s bases) and comonomers (BCMO,  $\beta$ BL,  $\epsilon$ CL) added to  $\gamma$ BL were investigated, enabling the synthesis of various polymer structures and  $\gamma$ BL fraction (Scheme 8a) [78, 91, 102, 124-130].

As an example, poly( $\gamma$ BL-*co*- $\epsilon$ CL)s with 84% of  $\gamma$ BL content revealed a higher degradation rate than PCL, following the degradation order [OH<sup>-</sup>/H<sub>2</sub>O] > [H<sup>+</sup>/H<sub>2</sub>O] > [H<sub>2</sub>O]. The incorporation of  $\gamma$ BL into PCL is a way to regulate its degradation rate.

Interestingly, alternated poly(amine urethane)s were synthesized by the copolymerization of tetramethylene urea (TeU) and  $\gamma$ BL [131]. Di-*n*-butylmagnesium (*n*-Bu<sub>2</sub>Mg) was employed as the catalyst in bulk at 100 °C (Scheme 8b). Terpolymers of TeU,  $\gamma$ BL, and ethylene carbonate (EC) or propylene carbonate (PC) were also synthesized in the same reaction conditions.

CO<sub>2</sub> was also proposed to be part of the copolymerization of PO with  $\gamma$ BL in benzene at 60 °C with polymer supported bimetallic complexes (PBM, P–Zn[Fe(CN)<sub>6</sub>]<sub>a</sub>Cl<sub>2-3a</sub>(H<sub>2</sub>O)<sub>b</sub>, where P is a polyether type chelating agent) [132, 133]. With the increased  $\gamma$ BL incorporation, the resultant copolymers exhibited varied  $\overline{M}_v$  from 59.8 to 123 kg.mol<sup>-1</sup>, as well as enhanced degradability.

Amphiphilic block copolymers of PEG-*b*-poly( $\gamma$ VL-*co*- $\epsilon$ CL) were synthesized



using PEG-OH as a macroinitiator with  $\text{Sn}(\text{Oct})_2$  at elevated temperatures (120–160 °C) [134, 135]. The lower temperature was beneficial to the copolymerization, providing more controlled copolymers with relatively narrow distribution ( $\overline{M}_n = 8.6\text{--}10.6 \text{ kg}\cdot\text{mol}^{-1}$ ,  $D = 1.18\text{--}1.25$ ). When the incorporation of  $\gamma\text{VL}$  was increased (9–16%), the copolymers showed higher surface hydrophilicity, decreased crystallization, and consequently higher biodegradation rates.

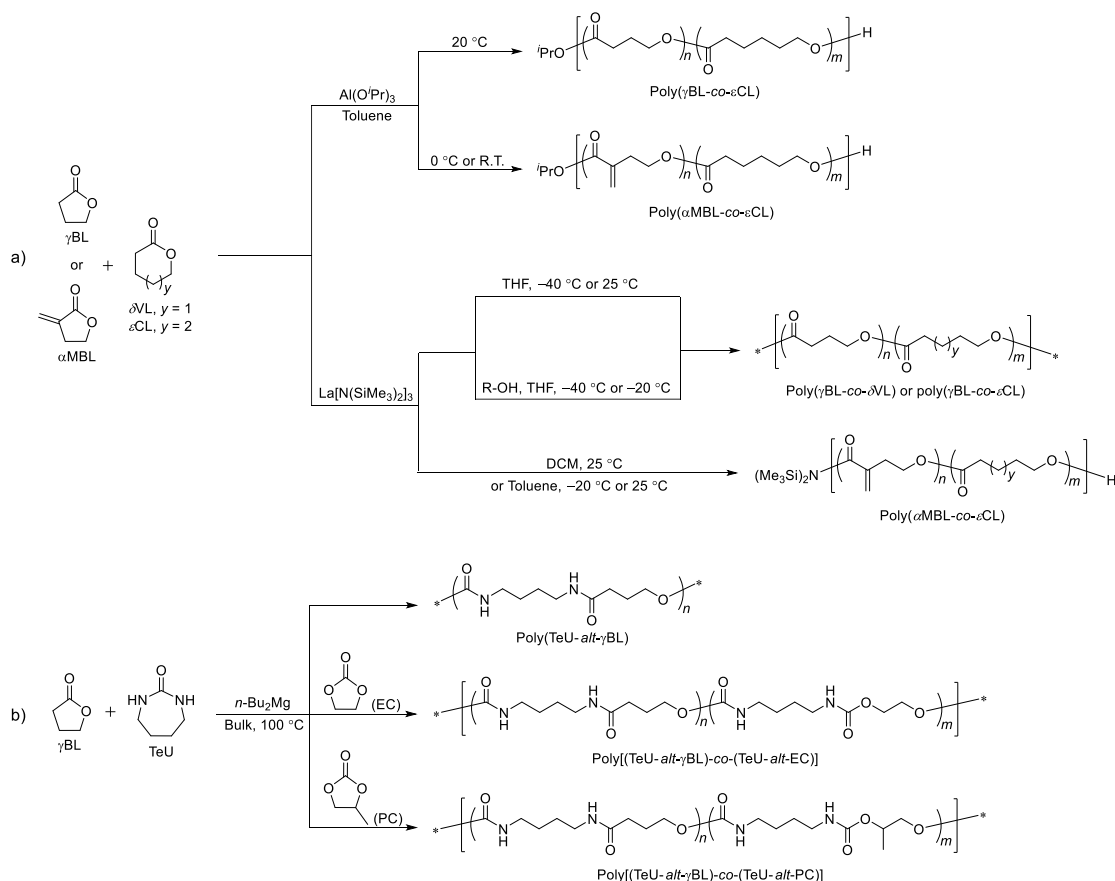

Scheme 8. Examples of ROCP of  $\gamma$ -lactones by coordination-insertion mechanism: (a)  $\gamma\text{BL}$  and  $\epsilon\text{CL}/\delta\text{VL}$  [91, 125],  $\alpha\text{MBL}$  and  $\epsilon\text{CL}$  [78, 136], (b)  $\gamma\text{BL}$ , TeU and/or EC, PC [131].

Following a similar approach, the copolymerization of  $\alpha$ MBL and  $\epsilon$ CL was first carried out in bulk at 130 °C using bismuth(III) trifluoromethanesulfonate ( $\text{Bi}(\text{OTf})_3$ ) as the catalyst, which actually led to a mixture of ring-opening copolyester, poly( $\alpha$ MBL-*co*- $\epsilon$ CL), and undesired homopolymer,  $\text{P}(\alpha\text{MBL})_{\text{VAP}}$ , originating from the vinyl-addition polymerization of  $\alpha$ MBL [136, 137]. More recently, unsaturated copolyesters poly( $\alpha$ MBL-*co*- $\epsilon$ CL) without contamination of  $\text{P}(\alpha\text{MBL})_{\text{VAP}}$  were obtained with lanthanide compounds ( $\text{Ln}[\text{N}(\text{SiMe}_3)_2]_3$ ) [136]. The  $T_m$  of the obtained poly( $\alpha$ MBL-*co*- $\epsilon$ CL) decreased linearly with the increase of the amount of  $\alpha$ MBL incorporated, as  $\alpha$ MBL units prevented the crystallization of PCL segments.

The ROP of  $\alpha$ AL was successfully carried out in toluene at 110–130 °C using  $\text{Sn}(\text{Oct})_2$  as the catalyst/initiator (Scheme 9a) [138, 139]. Aliphatic unsaturated poly( $\alpha$ -angelica lactone)s ( $\text{P}\alpha\text{AL}$ ) with carboxylic and hydroxyl groups as the chain-ends were obtained ( $\overline{M}_n = 8.9\text{--}29.4 \text{ kg}\cdot\text{mol}^{-1}$ ,  $D = 1.12\text{--}1.57$ ), corresponding to a coordination-insertion mechanism. The degradability of these synthesized  $\text{P}\alpha\text{AL}$  was tested in different conditions, and the degradation rate follows the order of basic (pH = 10.0) > acidic (pH = 2.5) > neutral (pH = 7.0). Through DFT analysis, it was inferred that the presence of endocyclic C=C significantly increased the strain energy of the corresponding five-membered ring, leading to the ROP of  $\alpha$ AL under moderate conditions. This catalytic system was also applied for the copolymerization of  $\alpha$ AL and  $\epsilon$ CL to produce poly( $\alpha$ AL-*co*- $\epsilon$ CL)s with 30–47% of  $\alpha$ AL incorporation ( $\overline{M}_n = 5.8\text{--}7.4 \text{ kg}\cdot\text{mol}^{-1}$ ,  $D = 1.19\text{--}1.33$ ) (Scheme 9a) [140]. The incorporation of  $\alpha$ AL significantly decreased the crystallization of PCL and showed an enhanced degradability compared

to PCL.

Graft copolymers with a degradable polyester backbone were obtained through the copolymerization of  $\alpha$ -bromo- $\gamma$ -butyrolactone ( $\alpha$ Br $\gamma$ BL) and  $\epsilon$ CL or LLA. The ROCP was conducted in bulk at 110 °C using Sn(Oct)<sub>2</sub> as the catalyst (Scheme 9b) [141]. The non-homopolymerizability of  $\alpha$ Br $\gamma$ BL under such conditions was confirmed, and only separated  $\alpha$ Br $\gamma$ BL units were detected. The  $\alpha$ Br $\gamma$ BL incorporation was always below 12%. This was consistent with their reactivity ratios, *i.e.*,  $r_{\text{LLA}} = 18.48$ ,  $r_{\epsilon\text{CL}} = 4.43$  and  $r_{\alpha\text{Br}\gamma\text{BL}}$  close to 0 for both (0.32 and 0.01, respectively). These copolymers were used for SET-LRP, with separated  $\alpha$ Br $\gamma$ BL units as active grafting sites. Several acrylic monomers such as methyl methacrylate (MMA), 2-hydroxyethyl methacrylate, and butyl acrylate were successfully grafted onto the poly( $\alpha$ Br $\gamma$ BL-*co*- $\epsilon$ CL) backbone in a controlled manner.

The ROCP of  $\gamma$ BL and 3,4-T6L was investigated in order to produce a new class of biorenewable and degradable materials (Scheme 9c) [142, 143]. La[N(SiMe<sub>3</sub>)<sub>2</sub>]<sub>3</sub>, Zn1 and Y1a complexes proved to be suitable for the copolymerization. The obtained polymers showed ductility and barrier properties that are suitable for packaging applications and could be readily modified by adjusting the copolymer composition to obtain materials suitable for specific purposes.

The  $\alpha$ OH $\gamma$ BL was chosen as the inimer to be copolymerized with  $\epsilon$ CL [144]. The copolymerization was performed in toluene or bulk at 110 °C using Sn(Oct)<sub>2</sub>. Branched copolyesters with various degree of branching were synthesized. The higher amount of branching led to the decrease of  $T_m$ . Interestingly,  $\alpha$ -hydroxy- $\beta,\beta$ -dimethyl- $\gamma$ -

butyrolactone ( $\alpha\text{OH}\beta\text{Me}_2\gamma\text{BL}$ ) could only serve as an initiator in such copolymerization due to the steric hindrance of the substitutes. Copolymerization of  $\gamma\text{BL}$  and glycidol was also an alternative to produce such branched structures [145].

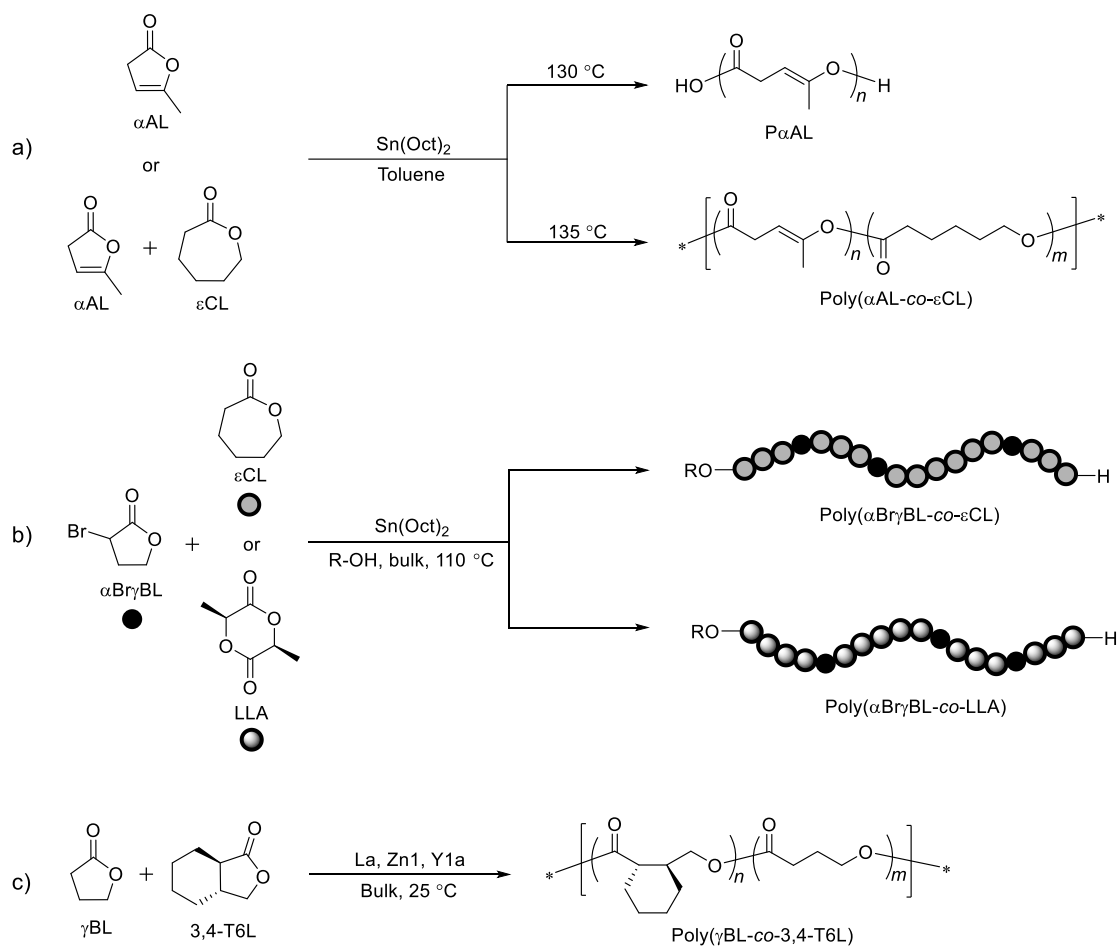

Scheme 9. Examples of ROCP of  $\gamma$ -lactones by coordination-insertion mechanism: (a)  $\alpha\text{AL}$  and  $\epsilon\text{CL}$  [138, 140], (b)  $\alpha\text{Br}\gamma\text{BL}$  and  $\epsilon\text{CL}/\text{LLA}$  [141], (c)  $\gamma\text{BL}$  and 3,4-T6L [143].

Organo-metallic systems permitting a coordination-insertion mechanism also appear to be efficient catalysts for the homopolymerization of  $\gamma$ -lactones and their copolymerization with other cyclic monomers, yielding polyesters with enhanced

degradability. High molar masses can be reached by this route. A few works are dealing with stereoselectivity, which make this route unique to produce specific materials.

#### 8. Dual catalytic system-catalyzed ROP/ROCP of $\gamma$ -lactones

Bifunctional catalytic systems (also termed as cooperative catalysts) including bicomponent catalysts (Lewis acid-base pairs) and bifunctional unimolecular catalysts like the cyclic guanidine TBD were widely investigated and utilized for the polymerization of polar monomers (*e.g.*, polar vinyl monomers, cyclic esters and others). Several reviews focusing on this subject were already published [42, 43, 146-152]. The advantage of such systems originates from the cooperative dual activation of both the monomer and the initiator/chain end. Such bifunctional dual activation is the result of the combination of an electrophile (*e.g.*, weak Brønsted acids) activating the monomer (activated monomer mechanism, AMM) and a general base activating the initiator/chain end (activated chain-end mechanism, ACEM) (Scheme 10), which provides an effective means to trigger/promote the ROP and improves the selectivity of the polymerization over side reactions.

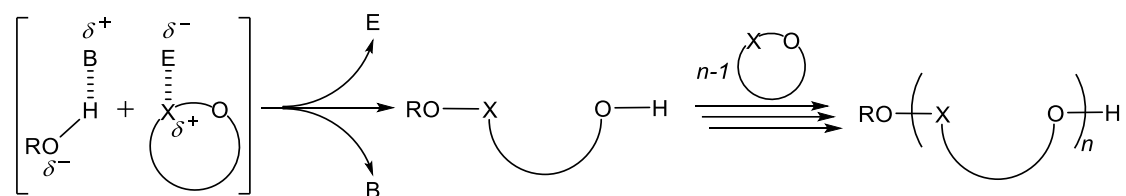

E = Electrophile; B = Base; X = CH<sub>2</sub>, C=O, *etc.*

Scheme 10. Bifunctional activation mechanism for ROP of cyclic monomers.

Generally, (thio)ureas are a class of representative hydrogen-bonding donors which were widely utilized in organic base-catalyzed cyclic monomers (*e.g.*, lactones, lactides, cyclic carbonates *etc.*) [153-155]. The presence of (thio)ureas is usually considered to play dual roles during the polymerization, *i.e.*, activating the monomer as well as associating with the chain end. The latter character sometimes can also be regarded as modifying the basicity/nucleophilicity of the active species. This hypothesis was proven through the synthesis of polyether-based block copolymers *via* a “catalyst switch” strategy [156, 157]. The addition of thiourea (TU) was shown to attenuate the basicity of the active center. This allowed the controlled polymerization of the subsequently added monomers, and prevented side reactions that are usually caused by the strong basicity of alkoxides. Such retarded active species strategy was also applied to the ROP of  $\gamma$ BL and derivatives.

Linear P $\gamma$ BLs with high molar masses were synthesized in toluene at low temperatures (< -40 °C) through the combination of *t*-BuP<sub>4</sub> and symmetrical thioureas bearing electron-donating groups (Scheme 11a) [25]. In absence of alcohol as the initiator, the ROP of P $\gamma$ BL could be directly initiated/catalyzed by the dual organocatalyst 1,3-diisopropyl-2-thiourea (TU1) TU1/*t*-BuP<sub>4</sub>. Depending on the feed ratios of TU1/*t*-BuP<sub>4</sub>, a mixture of P $\gamma$ BL<sub>L1</sub> and P $\gamma$ BL<sub>C</sub> or only P $\gamma$ BL<sub>L1</sub> (TU1/*t*-BuP<sub>4</sub> = 1 or 1.5) was obtained. Using the latter feed ratio, P $\gamma$ BL<sub>L1</sub> with higher molar mass ( $\overline{M}_n = 64.3 \text{ kg}\cdot\text{mol}^{-1}$ ,  $D = 2.35$ ) was produced when the polymerization was performed at -55 °C. On the other hand, the addition of an alcohol (BnOH) could greatly decrease the

formation of P $\gamma$ BL<sub>L1</sub> and cyclic polymer. Fully BnO-initiated polyester (P $\gamma$ BL<sub>L2</sub>) was obtained. The combination of DBU and TU2 (1-[3,5-bis(trifluoromethyl) phenyl]-3-cyclohexyl-thiourea) was also effective to polymerize  $\gamma$ BL in bulk [75].

Similarly, a binary catalytic system composed of ureas and CTPB was also studied for the polymerization of  $\gamma$ BL conducted in THF at -50 °C (Scheme 11b) [158]. In the absence of the initiator (BnOH), 1-cyclohexyl-3-(4-methoxyphenyl)-urea (U2; U2/CTPB = 3/1), a urea bearing unsymmetrical and electron-donating substituents, yielded a mixture of high molar mass P $\gamma$ BL<sub>L1</sub> and P $\gamma$ BL<sub>C</sub> with *ca.* 50% monomer conversion ( $\overline{M}_n = 28\text{--}35 \text{ kg}\cdot\text{mol}^{-1}$ ,  $\overline{D} = 1.90\text{--}2.06$ ). However, keeping U2/CTPB at 3/1 and adding BnOH as the initiator favoured the formation of mainly P $\gamma$ BL<sub>L2</sub> ( $\overline{M}_n = 9.1\text{--}23.3 \text{ kg}\cdot\text{mol}^{-1}$ ,  $\overline{D} = 1.38\text{--}2.13$ ). Noticeably, the thermal stability and mechanical properties of the resultant P $\gamma$ BLs were improved with increasing molar mass.

Adding (thio)ureas to phosphazene bases for the polymerization of  $\gamma$ BL appeared to be efficient. Initiation was more selective, and defined (linear) structures were produced.

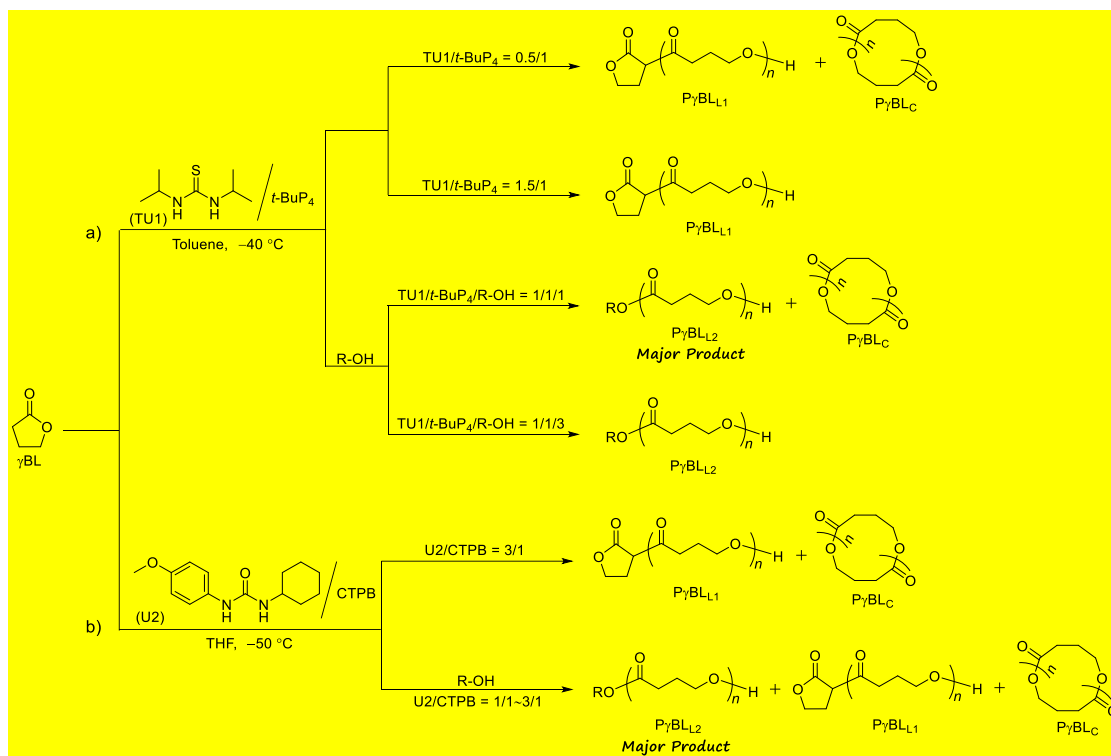

Scheme 11. ROP of  $\gamma$ BL by different dual catalytic systems: (a) TU1/*t*-BuP<sub>4</sub> [25], (b) U2/CTPB [158].

Bicomponent catalysts composed of NHOs and lithium halides (LiX) were used for the ROP of  $\gamma$ BL in bulk at -36 °C (Scheme 12) [24]. With BnOH as the initiator, NHO3 and LiX (NHO3/LiX = 1/5) provided a mixture of P $\gamma$ BL<sub>L2</sub> and P $\gamma$ BL<sub>C</sub> with a monomer conversion similar to the one obtained with NHOs alone ( $\overline{M}_n = 4.7\text{--}7.8$  kg.mol<sup>-1</sup>,  $\mathcal{D} = 1.4\text{--}1.8$ ). Interestingly, NHOs/LiX could also trigger the polymerization without any alcohol. The topological structures of the obtained P $\gamma$ BLs depended on the nucleophilicity and steric hindrance of involved NHOs. For example, the combination of LiCl and NHO4, which is highly basic and sterically hindered, led to the formation of linear P $\gamma$ BL<sub>L1</sub> ( $\overline{M}_n = 5.8$  kg.mol<sup>-1</sup>,  $\mathcal{D} = 1.6$ ) based on an anionic ROP mechanism. On



the contrary, the association of LiCl and NHO7, which is highly nucleophilic and sterically non-hindered, provided NHO-terminated P $\gamma$ BL based on a zwitterionic ROP mechanism ( $\overline{M}_n = 3 \text{ kg}\cdot\text{mol}^{-1}$ ,  $D = 1.9$ ). The association of LiX and NHO6, which is mildly polarized and sterically hindered, delivered exclusively the macrocyclic P $\gamma$ BL<sub>C</sub> in short reaction time, whereas increasing amounts of enolate-terminated P $\gamma$ BL<sub>L1</sub> appear with time ( $\overline{M}_n = 1.6\text{--}9 \text{ kg}\cdot\text{mol}^{-1}$ ,  $D = 1.4\text{--}2.4$ ). In addition, and irrespective of the pathway, low monomer conversion was observed (< 20%).

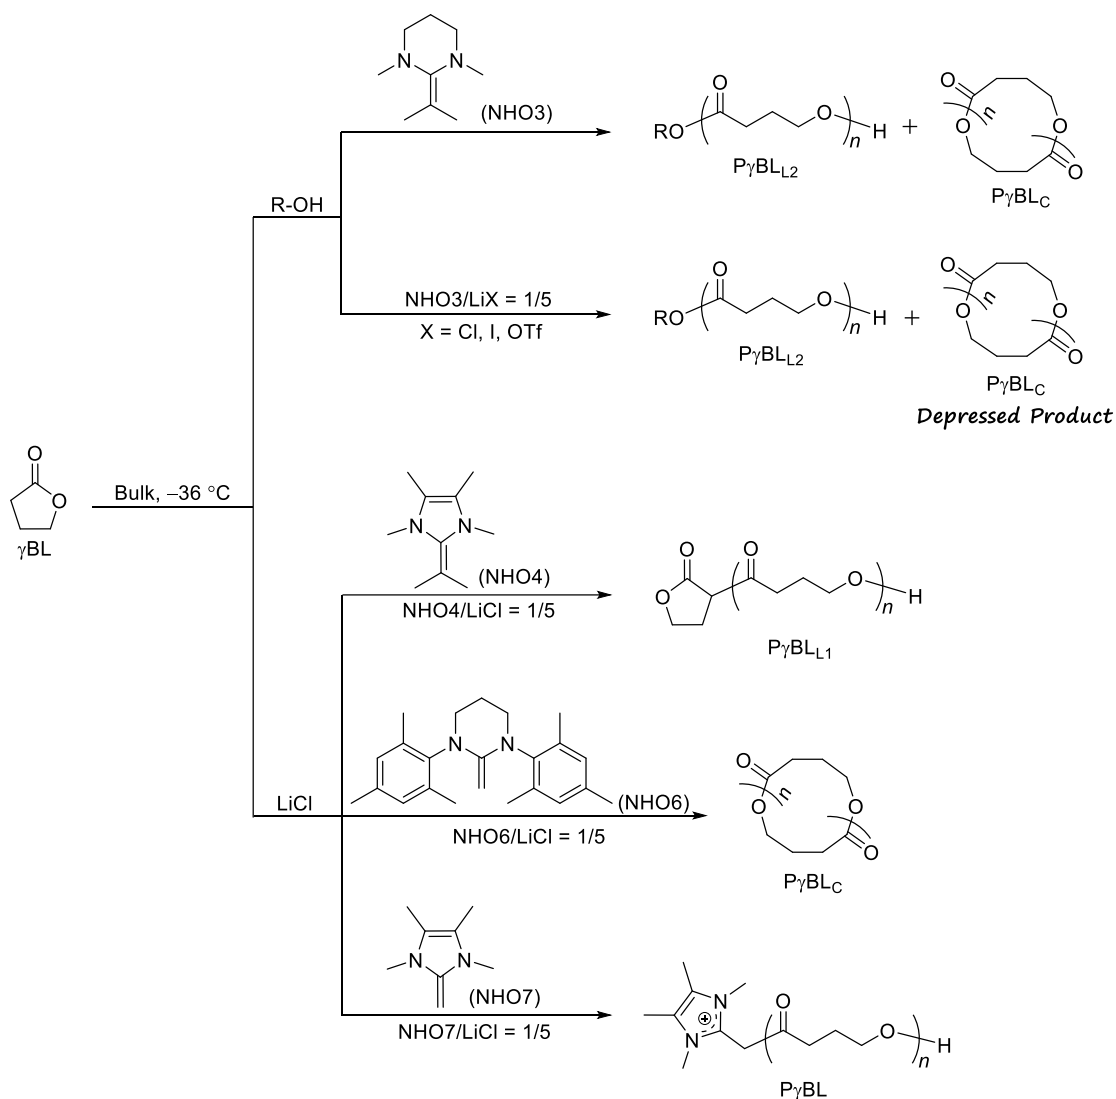

Scheme 12. ROP of  $\gamma\text{BL}$  by LiX/NHOs dual catalytic system [24].

Commercial alkoxides such as sodium or potassium methoxides (MtOMe) were also combined with ureas to polymerize  $\gamma$ BL (Scheme 13a) [26]. Its bulk polymerization was shown to proceed at -40 °C using MtOMe alone with limited monomer conversion ( $\leq 25\%$ ). Combination of 1-cyclohexyl-3-phenyl-urea (U1) and MtOMe (U1/MtOMe = 1/1 to 3/1) enhanced the reactivity of the active species, allowing for the ROP of  $\gamma$ BL in bulk at low temperatures (-40 to -20 °C), and a monomer conversion with up to 86% was achieved in a few hours. The obtained P $\gamma$ BLs showed two different chain ends, *i.e.*, MeO/H and acylated lactone/H ( $\overline{M}_n = 7.0\text{--}68.2 \text{ kg}\cdot\text{mol}^{-1}$ ,  $\overline{D} = 1.33\text{--}2.08$ ) [158].

The ROP of substituted  $\gamma$ BL, 4,5-T6L, was also investigated with binary catalytic system (Scheme 13b) [73]. Initially, various bicomponent catalysts with balanced acidity of (thio)ureas and basicity of co-catalysts ((thio)ureas/base = 1/1) were studied. Among them, the combination of 1,3-diphenylurea (U3) and BEMP or IMes (U3/BEMP or IMes), 1-[3,5-bis(trifluoromethyl) phenyl]-3-cyclohexyl-urea (U4) and BEMP or IMes (U4/BEMP or IMes), and TU1/IMes afforded the best results. The monomer conversion was higher than 50% in a few minutes with the polymerization performed at RT in bulk. Linear P(4,5-T6L)s with various molar masses were obtained using TU1/IMes under the same conditions ( $\overline{M}_n = 21.1\text{--}106 \text{ kg}\cdot\text{mol}^{-1}$ ,  $\overline{D} = 1.02\text{--}1.04$ ). Block copolymers poly(4,5-T6L-*b*-LLA) were obtained, verifying the living character of the polymerization. Linear P(4,5-T6L) produced by this binary organocatalyst showed a higher  $T_d$  (by 13 °C) than that of the polymer synthesized with a metal catalyst, which highlights the advantages of organocatalysis due to better selectivity of the active

centers.

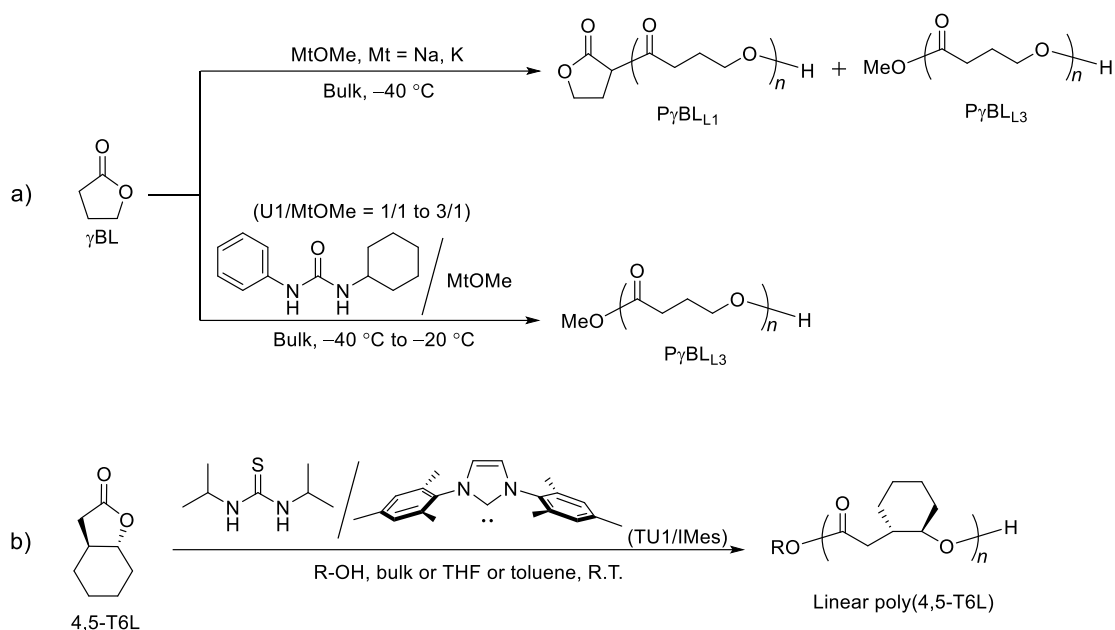

Scheme 13. ROP of  $\gamma$ BL or 4,5-T6L by different dual catalytic systems: (a) U1/MtOMe [26], (b) TU1/IMes [73].

Recently, the chemoselective ROP of biorenewable  $\alpha$ MBL was achieved in THF at  $-50\text{ }^\circ\text{C}$  through the cooperative catalysis of 1-cyclohexyl-3-(4-(trifluoromethyl)phenyl)-urea (U5) and CTPB (U5/CTPB = 3/1) [159]. Low reaction temperature and the choice of urea were critical to produce these unsaturated polyesters ( $\overline{M}_n$  up to  $6.7\text{ kg}\cdot\text{mol}^{-1}$ ). Moreover, high monomer concentration ( $[\alpha\text{MBL}]_0 = 8\text{ M}$ ) improved yields. DFT calculation results also indicated that the ROP pathway was more kinetically favored, whereas the competing VAP pathway was thermodynamically favored. The resultant polyesters could be recycled back to  $\alpha$ MBL with the dual catalysis of CTPB and a urea with more electron-withdrawing substituents (1,3-bis(3,5-

bis(trifluoromethyl)phenyl)-urea, U7).

Selective ring-opening copolymerization of  $\alpha$ MBL and  $\epsilon$ CL or  $\delta$ VL was also achieved at low temperatures with similar bicomponent catalyst based on CTPB [160].

The ROCP of  $\gamma$ BL and  $\delta$ VL,  $\epsilon$ CL or  $\omega$ -pentadecalactone ( $\omega$ PDL) was performed in the presence of  $\text{NH}_3/\text{BnOH}$  associated with several metal halides (MtX) such as LiCl, magnesium chloride ( $\text{MgCl}_2$ ), yttrium(III) chloride ( $\text{YCl}_3$ ), and zinc iodide ( $\text{ZnI}_2$ ) ( $\text{NH}_3/\text{MtX} = 1/5$ ) (Scheme 14a) [161]. Copolymers with moderate  $\gamma$ BL content (up to 22%) were generally obtained.

Another dual catalytic system based on the combination of bimetallic chromium catalyst which could mediate enantioselective polymerization of *racemic* propylene oxide (*rac*PO) and DBU (1/5) was used to copolymerize  $\gamma$ BL and *rac*PO. The copolymerization was performed in bulk at 23 °C with 1,6-hexanediol as the CTA (Scheme 14b) [162]. Both the monomer conversion of  $\gamma$ BL and PO were limited ( $\leq 13\%$ ), generating statistical poly( $\gamma$ BL-*co*-PO)s with isotactic polyether sequences ( $\overline{M}_n = 2.7\text{--}10.5 \text{ kg}\cdot\text{mol}^{-1}$ ,  $\overline{D} = 1.07\text{--}1.14$ ). The poly(ether-ester) copolymers obtained showed adjustable ester content and crystallinity, the latter decreasing with increasing  $\gamma$ BL and CTA loadings.

The terpolymerization of PO,  $\text{CO}_2$  and  $\gamma$ BL was also investigated in bulk at 50 °C using the combination of salen  $\text{Co}^{\text{III}}\text{X}$  (X = 2,4-dinitrophenoxide) and a bulky ionic salt tetrabutylammonium bromide ( $n\text{Bu}_4\text{NBr}$ ) [163]. The  $\overline{M}_n$  of terpolymers obtained was affected by several reaction parameters, such as the feed ratio of monomer, temperature, and reaction time (74–102.1  $\text{kg}\cdot\text{mol}^{-1}$ ). Compared with the copolymers of PO and  $\text{CO}_2$ ,

these terpolymers revealed improved thermal properties with the introduction of  $\gamma$ BL.

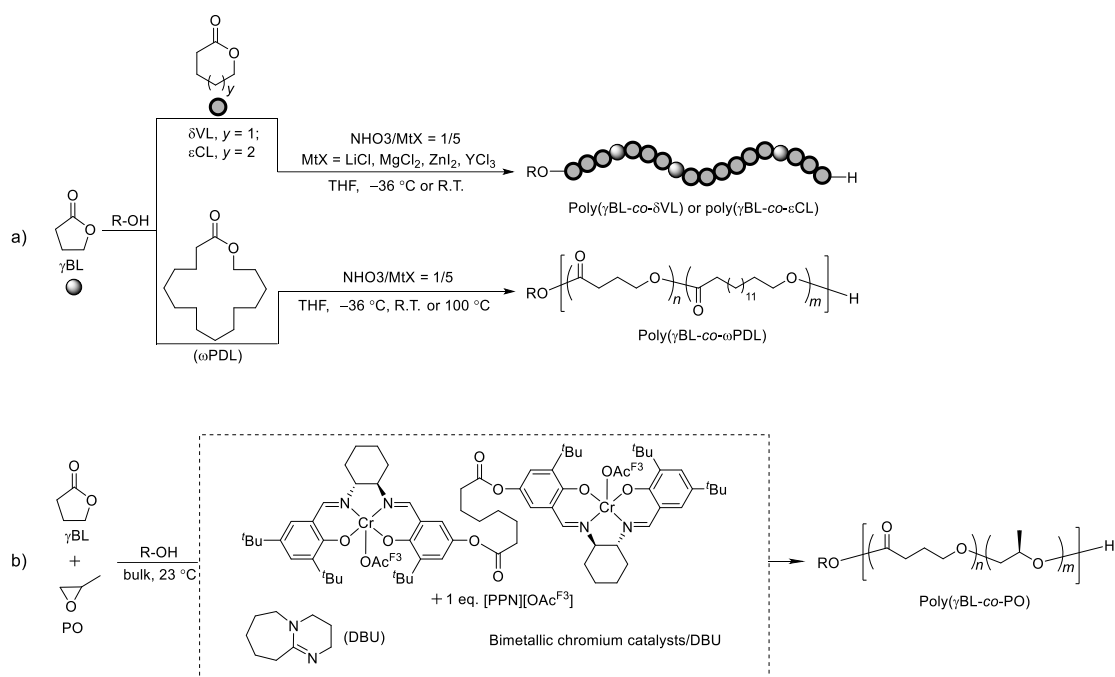

Scheme 14. ROCP of  $\gamma$ BL with cyclic monomers by dual catalysts in the presence of an alcohol: (a)  $\gamma$ BL and  $\delta$ VL,  $\epsilon$ CL or  $\omega$ PDL [161], (b)  $\gamma$ BL and *racemic* PO [162].

Comparing this dual catalysis approach to the mono-component organic one discussed previously (section 5), a better control seems to be achieved and can be attributed to a finely tuned reactivity of the active centers and monomers. Combining a urea to a metal alkoxide allows, for example, the ROP of  $\gamma$ BL with a monomer conversion higher than 80% in short times. Thus, the utilization of bicomponent catalysts, such as Lewis acids and bases, or bifunctional unimolecular catalysts, permits the modulation of the basic and nucleophilic character as well as steric hindrance of the chain ends. This enables control of reactivities and selectivities and, is definitely a route

to follow in order to progress in the polymerization control of such lactones.

## 9. Other polymerization methodologies for $\gamma$ -lactones

In this section, several approaches used for polymerization of  $\gamma$ BL and its derivatives are summarized. The related mechanism depends on the specific catalytic system used, such as polycondensation, enzymatic catalysis, transesterification, or ring-opening..

The copolymerization of  $\gamma$ BL and L-Lactic acid or glycolic acid was conducted without catalysts in bulk at 200 °C [164-166]. Copolymers with relatively low molar masses and  $\gamma$ BL content (1.1–5.2 kg.mol<sup>-1</sup>, 10–20%) were synthesized, containing single  $\gamma$ BL units in the polymeric chain. The proposed mechanism was a direct polycondensation between the linear acids and the  $\omega$ -hydroxy acid produced by the hydrolysis of  $\gamma$ BL in presence of water.

Enzymatic ROP (eROP) of lactones has been studied since 1993 [167-170]. A few studies described the use of lipases for the ROP/ROCP of  $\gamma$ BL. For instance, P $\gamma$ BL with  $\overline{DP}$  around 10 was produced by the use of lipases from Porcine Pancreatic or from *Pseudomonas cepacia* in *n*-hexane at 60 °C after 20 days [171]. A poly( $\gamma$ BL-*co*- $\epsilon$ CL) copolymer was also synthesized under similar conditions with 3% of  $\gamma$ BL conversion ( $\overline{M}_n = 2.9$  kg.mol<sup>-1</sup>,  $\overline{D} = 2.16$ ) [172]. Besides, the use of immobilized *Candida antarctica* lipase B in ionic liquids led to the oligomerization of  $\gamma$ BL ( $\overline{DP} = 5$ ) [173].

The ROP of  $\gamma$ BL was also studied at RT using tin(IV) ion-exchanged montmorillonite, mainly producing dimers and trimers, while its copolymerization with

$\delta$ VL led to the formation of copolyester with a limited  $\gamma$ BL incorporation ( $\overline{DP}$  around 4–6) [174]. Activated clay could also promote the copolymerization of  $\gamma$ BL and 1,2-ethanediol in xylene at reflux to produce oligomeric polyether-polyester with single  $\gamma$ BL units in the polymeric chain. They were used as precursors for polyurethane synthesis [175].

The curing reaction of DGEBA and  $\gamma$ VL or  $\gamma$ MBL was performed in the presence of boron trifluoride ethylamine complex ( $\text{BF}_3 \cdot \text{EtNH}_2$ ) or rare earth triflates such as  $\text{Sc}(\text{OTf})_3$  and lanthanum(III), ytterbium(III) trifluoromethanesulfonate ( $\text{La}(\text{OTf})_3$ , and  $\text{Yb}(\text{OTf})_3$ , respectively) (Scheme 15) [176-178]. Four different reactions were observed during the curing process, that is, (1) spiroorthoester intermediates formation by the reaction of DGEBA and  $\gamma$ VL (or  $\gamma$ MBL), (2) homopolymerization of DGEBA, (3) copolymerization of DGEBA with the spiroorthoester intermediate, and (4) homopolymerization of the spiroorthoester [179]. Compared with the conventional epoxy resin, the obtained thermosets were more thermally degradable, due to the introduction of ester group in the polymer chain [180]. In addition, DMAP, DBU, and 1-methylimidazole (1-MI) were applied for the copolymerization of DGEBA and BBLs (BBL1, BBL5). The stoichiometric proportion of DGEBA/BBL led to the desirable alternating poly(ether-ester-ketone) structure [181].

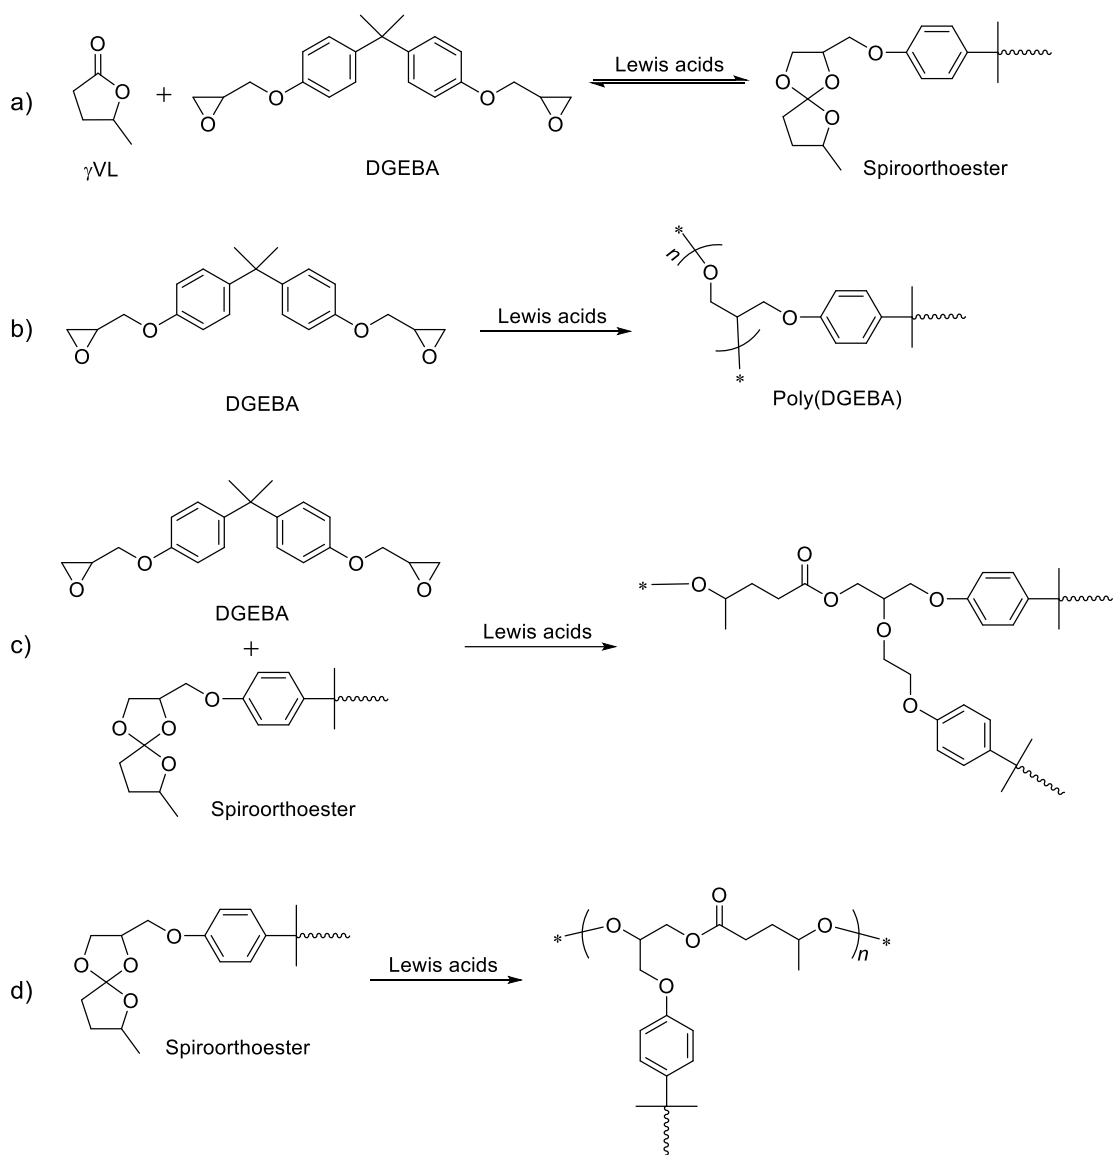

Scheme 15. Curing procedure between DGEBA and  $\gamma\text{VL}$ : (a) spiroorthoester intermediates formation, (b) homopolymerization of DGEBA, (c) copolymerization of DGEBA with the spiroorthoester, (d) homopolymerization of the spiroorthoester [179].

The polycondensation of BBLs (BBL1, 8, 9) and 1,4-benzenedimethanol (BDM) was promoted by *p*-toluenesulfonic acid (*p*-TsOH) under ambient or reduced pressure at 80–120 °C, generating corresponding polyesters with a ketone group in the side chain ( $\overline{M}_n = 3.0\text{--}5.0 \text{ kg}\cdot\text{mol}^{-1}$ ,  $D = 1.6\text{--}8.9$ ) [182]. On the other hand,  $\gamma\text{BL}$  was shown able to



end-functionalize oligoethylene glycol (HO-PEG-OH,  $\overline{M}_w = 0.8 \text{ kg.mol}^{-1}$ ) [183]. The process was performed at 130 °C with non-eutectic mixture of organocatalysts (NEMO), composed of a non-stoichiometric complex of MSA and TBD (MSA/TBD = 3/1). 52% of the oligo-PEG hydroxyl end-groups were functionalized by about 1.5 units of  $\gamma$ BL, and polyethers were subsequently produced by the thermal/vacuum polycondensation of these functionalized oligomers. The resulting polycondensate PEG ( $\overline{M}_p = 17.0 \text{ kg.mol}^{-1}$ ,  $\overline{D} = 1.7$ ) was completely degradable in a 0.5 M NaOH solution.

Transesterification, which is normally regarded as a detrimental side reaction for the synthesis of polyester, could nevertheless be utilized to modify the polyesters. The original strategy was to employ an organic superbases that acted as the promoter for both ROP of epoxides and transesterification reactions with hydroxyl-terminated polyester, to provide a random poly(ester-ether) [184]. This approach was employed for the upcycling of polyesters with ROP of  $\gamma$ BL (Scheme 16a). Poly(glycolic acid) (PGA) was chosen as the first candidate for the transesterification, combined with ROP of  $\gamma$ BL, which served as both a solvent and a comonomer [63]. The reaction was performed in the presence of BnOH as the initiator at 160 °C using  $\text{La}[\text{N}(\text{SiMe}_3)_2]_3$  or TBD. The  $\gamma$ BL incorporation in the poly(GA-co- $\gamma$ BL)s varied from 12 to 20% and improved the solubility of the copolymer ( $\overline{M}_n = 4.7\text{--}7.2 \text{ kg.mol}^{-1}$ ,  $\overline{D} = 1.15\text{--}1.30$ ). The resulting poly(GA-co- $\gamma$ BL)s also showed enhanced thermal properties compared to PGA.

The transesterification on poly( $\delta$ -valerolactone) (PVL) - or PCL in the process of ROP of  $\gamma$ BL - was also investigated (Scheme 16b) [185]. Dual organocatalyst based on U3/TBD (1/1 to 10/1) was employed for the reaction of PVL and  $\gamma$ BL performed at

25 °C. TBD alone could catalyze the transesterification of PVL and  $\gamma$ BL, whereas its association to U3 (U3/TBD = 1/1) improved the  $\gamma$ BL incorporation without deteriorating the  $\overline{M}_n$  of obtained copolyesters. The enhanced  $\gamma$ BL incorporation in U3/TBD-mediated transesterification was proposed to be due to the preferential activation of  $\gamma$ BL monomer over the polymer chain. Poly( $\delta$ VL-co- $\gamma$ BL) with higher  $\gamma$ BL incorporation (up to 38%) could be synthesized by increasing the feed ratio of U3/TBD from 1/1 to 10/1 ( $\overline{M}_n = 10.5\text{--}20.5 \text{ kg}\cdot\text{mol}^{-1}$ ,  $\mathcal{D} = 1.56\text{--}1.63$ ). The reaction could also be performed in the absence of alcohols, and high molar mass copolymers with various  $\gamma$ BL incorporation (7–28%;  $\overline{M}_n = 21.0\text{--}40.6 \text{ kg}\cdot\text{mol}^{-1}$ ,  $\mathcal{D} = 1.72\text{--}1.89$ ) were obtained. When switching to PCL, the reaction was more efficient if conducted at 80 °C, producing poly( $\epsilon$ CL-co- $\gamma$ BL) with moderate  $\gamma$ BL incorporation (5–13%;  $\overline{M}_n = 9.6\text{--}26.7 \text{ kg}\cdot\text{mol}^{-1}$ ,  $\mathcal{D} = 1.33\text{--}1.77$ ). Noticeably, both reactions could be carried out under air to give similar copolymers, highlighting the air/moisture tolerance of such binary catalytic system.

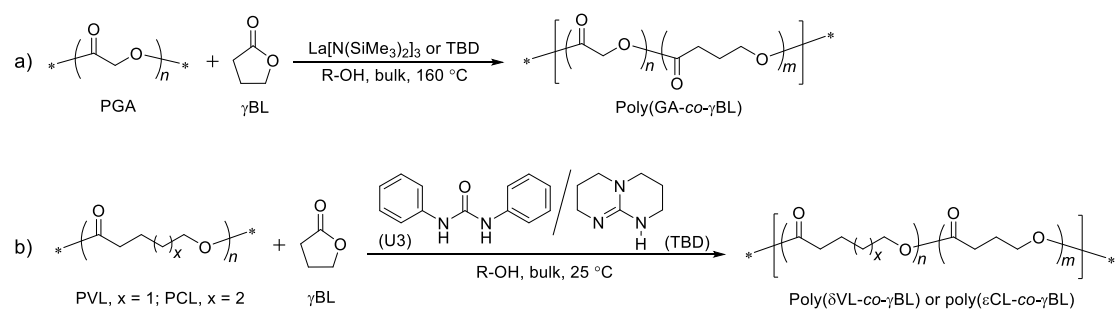

Scheme 16. Copolyesters produced by transesterification and ring-opening of  $\gamma$ BL: (a) PGA with  $\gamma$ BL [63], (b) PVL or PCL with  $\gamma$ BL [185]

Polycondensation and enzymatic catalysis remain limited both in their use and

efficiency. The transesterification route combined to ring-opening polymerization of  $\gamma$ -BL, which is following the organometallic or dual catalysis methodologies and results, offers another way to get copolyesters.

#### 10. Thermal or chemical recycling of P $\gamma$ BL and other derivatives

Table 1 summarizes the methods to recycle the P $\gamma$ BL and other derivatives back to the corresponding monomer, based on thermal or chemical procedures. In most cases, the use of a catalyst allowed to depolymerize the product in a more energy-efficient way. For example, the depolymerization of P $\gamma$ BL in the absence of a catalyst needed to be carried out at 220 °C or 300 °C in bulk (linear or cyclic product, respectively), while the employment of TBD or La[N(SiMe<sub>3</sub>)<sub>2</sub>]<sub>3</sub> allowed it to proceed at 25 °C in solution [21]. The linear P $\gamma$ BL with different termination chain ends showed also similar depolymerization behaviours [118].

The recycling process of P( $\alpha$ MBL)<sub>ROP</sub> was slightly different from other derivatives [119]. Due to the appearance of unsaturated C=C in polyester, insoluble cross-linked products would be formed when the depolymerization was performed in bulk at high temperatures. In the presence of La[N(SiMe<sub>3</sub>)<sub>2</sub>]<sub>3</sub>, P( $\alpha$ MBL)<sub>ROP</sub> could be recycled back to  $\alpha$ MBL in a dilute dimethyl sulfoxide (DMSO) solution (H<sub>2</sub>O is added to inhibit polymerization) at relatively low temperatures. Moreover, the depolymerization of P( $\alpha$ MBL)<sub>ROP</sub> could also be achieved in DMSO using simple metal halides such as lanthanum(III) chloride (LaCl<sub>3</sub>), which was incapable to reinitiate the VAP of  $\alpha$ MBL generated from depolymerization.

The depolymerization of other derivatives such as P(3,4-T6L), P(4,5-T6L) and *it*-PCBL, *ht*-PCBL also showed similar behaviours [73, 120, 122, 123]. Compared with thermal recycling of related polymers in bulk at high temperatures, the depolymerization process was more favourable using catalysts in toluene. In addition, the copolyester poly( $\gamma$ BL-*co*-3,4-T6L) could also be chemically recycled back to its building monomers ( $\gamma$ BL, 3,4-T6L, respectively) [143], while the recycling of poly(GA-*co*- $\gamma$ BL) was achieved in a hydrolysis pathway [63].

Table 1 Summary of methods used for depolymerizing P $\gamma$ BL and derivatives

|                                 | Polymer | Catalyst                                             | Conditions          | Time (h) | Conv. (%) | Mon.         | Refs. |
|---------------------------------|---------|------------------------------------------------------|---------------------|----------|-----------|--------------|-------|
| P $\gamma$ BL                   |         | –                                                    | 220 °C, bulk        | 1        | 100       | $\gamma$ BL  | [21]  |
|                                 |         | –                                                    | 300 °C, bulk        | 1        | 100       |              |       |
|                                 |         | TBD                                                  | 25 °C, DCM          | 24       | 100       |              |       |
|                                 |         | La[N(SiMe <sub>3</sub> ) <sub>2</sub> ] <sub>3</sub> | 25 °C, THF          | 10 mins  | 100       |              |       |
|                                 |         | –                                                    | 260 °C, bulk        | 1        | 100       | [22]         |       |
| P( $\alpha$ MBL) <sub>ROP</sub> |         | La[N(SiMe <sub>3</sub> ) <sub>2</sub> ] <sub>3</sub> | 130 or 100 °C       | 1        | 100       | $\alpha$ MBL | [119] |
|                                 |         | La[N(SiMe <sub>3</sub> ) <sub>2</sub> ] <sub>3</sub> | 60 °C               | 24       | 100       |              |       |
|                                 |         | LaCl <sub>3</sub>                                    | 130 °C              | 24       | 97        |              |       |
|                                 |         | LaCl <sub>3</sub>                                    | 160 °C              | 6 or 24  | 100       |              |       |
|                                 |         | U7/CTPB                                              | 50 °C, THF          | 48       | 100       | $\alpha$ MBL | [159] |
| P $\gamma$ BL-OX <sub>1</sub>   |         | –                                                    | 250 °C, bulk        | 5        | 100       | $\gamma$ BL  | [118] |
| P $\gamma$ BL-OX <sub>2</sub>   |         | –                                                    | 250 °C, bulk        | 2        | 100       |              |       |
| P(3,4-T6L)                      |         | –                                                    | $\geq$ 300 °C, bulk | 1        | 100       | 3,4-T6L      | [120] |
|                                 |         | ZnCl <sub>2</sub>                                    | 120 °C, toluene     | 12       |           |              |       |

|                                        |  |                                                      |                 |    |        |                            |       |
|----------------------------------------|--|------------------------------------------------------|-----------------|----|--------|----------------------------|-------|
|                                        |  | –                                                    | ≥ 300 °C, bulk  | 24 |        |                            |       |
|                                        |  | ZnCl <sub>2</sub>                                    | 120 °C, toluene | 12 |        |                            |       |
| P(4,5-T6L)                             |  | –                                                    | 230 °C, bulk    | 40 | 100    | 4,5-T6L/4,5-C6L (89/11)    | [123] |
|                                        |  | La[N(SiMe <sub>3</sub> ) <sub>2</sub> ] <sub>3</sub> | 120 °C, toluene | 24 | 100    | 4,5-T6L                    |       |
|                                        |  | La[N(SiMe <sub>3</sub> ) <sub>2</sub> ] <sub>3</sub> | 120 °C, toluene | 24 |        |                            |       |
|                                        |  | TBD                                                  | 120 °C, toluene | 24 |        |                            | [73]  |
| <i>it</i> -PCBL                        |  | ZnCl <sub>2</sub>                                    | 130 °C, toluene | 24 | 100    | <i>rac</i> -CBL            | [122] |
| <i>ht</i> -PCBL                        |  |                                                      |                 |    |        |                            |       |
| Poly( $\gamma$ BL- <i>co</i> -3,4-T6L) |  | ZnCl <sub>2</sub>                                    | 120 °C, toluene | 60 | 100    | $\gamma$ BL, 3,4-T6L       | [143] |
| Poly(GA- <i>co</i> - $\gamma$ BL)      |  | 1 M NaOH and subsequent chemical steps               | –               | –  | 98, 94 | Glycolic acid, $\gamma$ BL | [63]  |

## 11. Conclusion

The ROP of  $\gamma$ BL under mild conditions was regarded as impossible or rarely possible for several decades. This review summarizes and comments on the development in polymerization of  $\gamma$ BL, especially focusing on the recent advances, to synthesize P $\gamma$ BL with a high molar mass under moderate reaction conditions. Dual catalytic systems made of ureas and bases, that can be commercially available and inexpensive, are quite efficient. Anionic and coordination-insertion polymerizations, which were investigated more than cationic ones, showed better results. Low reaction temperatures (to keep  $\Delta G_p < 0$ ) and high initial monomer concentrations are required for the homopolymerization of  $\gamma$ BL. On the other hand, such success was also applied to the ROP of  $\gamma$ BL derivatives to deliver a broad diversity of polyesters. Through the prudent design of substitutes, some of them could even be polymerized at ambient temperature. Furthermore, the use of multifunctional  $\gamma$ BL derivatives provided an alternative to obtain functional polyesters. More significantly, several resultant polymers could be depolymerized to their corresponding monomer by thermal or chemical treatments.

The ROCP of  $\gamma$ BL or its derivatives with other cyclic monomers afforded an opportunity to circumvent the obstacles in their homopolymerization, which also enriched the variety of chain structures and properties of resultant polymers. In this case, the incorporation of  $\gamma$ BL or its derivatives could even be performed at mild temperatures. However, challenges still remain in this field, such as polymerization of  $\gamma$ BL at ambient temperature, enhancement of the selectivity of polymerization over side

reactions (*e.g.*, back-biting), and more precise control of the molar masses and thermal/mechanical properties of the resulting materials. Again, the dual catalytic approach seems to be a method to develop further if the polymerization control is expected.

#### Acknowledgement

Q. Song gratefully thanks the China Scholarship Council for offering the scholarship to work in LCPO, University of Bordeaux, France.

#### References

- [1] Hillmyer MA, Tolman WB. Aliphatic polyester block polymers: Renewable, degradable, and sustainable. *Acc Chem Res* 2014;47:2390-6.
- [2] Schneiderman DK, Hillmyer MA. Aliphatic polyester block polymer design. *Macromolecules* 2016;49:2419-28.
- [3] Gonçalves FAMM, Fonseca AC, Domingos M, Gloria A, Serra AC, Coelho JFJ. The potential of unsaturated polyesters in biomedicine and tissue engineering: Synthesis, structure-properties relationships and additive manufacturing. *Prog Polym Sci* 2017;68:1-34.
- [4] Kamber NE, Jeong W, Waymouth RM, Pratt RC, Lohmeijer BG, Hedrick JL. Organocatalytic ring-opening polymerization. *Chem Rev* 2007;107:5813-40.
- [5] Penczek S, Cypryk M, Duda A, Kubisa P, Slomkowski S. Living ring-opening polymerizations of heterocyclic monomers. *Prog Polym Sci* 2007;32:247-82.
- [6] Jerome C, Lecomte P. Recent advances in the synthesis of aliphatic polyesters by ring-opening polymerization. *Adv Drug Deliv Rev* 2008;60:1056-76.
- [7] Hu S, Zhao J, Zhang G, Schlaad H. Macromolecular architectures through organocatalysis. *Prog Polym Sci* 2017;74:34-77.



- [8] Bozell JJ, Petersen GR. Technology development for the production of biobased products from biorefinery carbohydrates—the US department of energy’s “Top 10” revisited. *Green Chem* 2010;12:539-54.
- [9] Bomgardner MM. Biobased polymers. *Chem Eng News* 2014. p. 10–4
- [10] Moore T, Adhikari R, Gunatillake P. Chemosynthesis of bioresorbable poly( $\gamma$ -butyrolactone) by ring-opening polymerisation: A review. *Biomaterials* 2005;26:3771-82.
- [11] Saiyasombat W, Molloy R, Nicholson TM, Johnson AF, Ward IM, Poshyachinda S. Ring strain and polymerizability of cyclic esters. *Polymer* 1998;39:5581-5.
- [12] Houk K, Jabbari A, Hall H, Alemán C. Why  $\delta$ -valerolactone polymerizes and  $\gamma$ -butyrolactone does not. *J Org Chem* 2008;73:2674-8.
- [13] Aleman C, Betran O, Casanovas J, Houk KN, Hall HK, Jr. Thermodynamic control of the polymerizability of five-, six-, and seven-membered lactones. *J Org Chem* 2009;74:6237-44.
- [14] Duda A, Kowalski A. Thermodynamics and kinetics of ring-opening polymerization. In: Philippe Dubois OC, Jean-Marie Raquez, editors. *Handbook of ring-opening polymerization*. Weinheim: Wiley-VCH Verlag GmbH & Co KGaA, 2009. p. 1-51.
- [15] Olsen P, Odelius K, Albertsson AC. Thermodynamic presynthetic considerations for ring-opening polymerization. *Biomacromolecules* 2016;17:699-709.
- [16] Carothers WH, Dorough GL, Natta FJv. Studies of polymerization and ring formation. X. The reversible polymerization of six-membered cyclic esters. *J Am Chem Soc* 1932;54:761-72.
- [17] Hall HK, Schneider AK. Polymerization of cyclic esters, urethans, ureas and imides. *J Am Chem Soc* 1958;80:6409-12.
- [18] Korte F, Glet W. Hochdruckreaktionen. II. Die polymerisation von  $\gamma$ -butyrolacton und  $\delta$ -valerolactam bei hohen drücken. *J Polym Sci Part B Polym Lett* 1966;4:685-9.
- [19] Becker G, Wurm FR. Functional biodegradable polymers via ring-opening polymerization of monomers without protective groups. *Chem Soc Rev*. 2018;47:7739-82.
- [20] Zhao W, He J, Zhang Y. Lewis pairs polymerization of polar vinyl monomers. *Science Bulletin* 2019;64:1830-40.

- [21] Hong M, Chen EY. Completely recyclable biopolymers with linear and cyclic topologies via ring-opening polymerization of  $\gamma$ -butyrolactone. *Nat Chem* 2016;8:42-9.
- [22] Hong M, Chen EY. Towards truly sustainable polymers: A metal-free recyclable polyester from biorenewable non-strained  $\gamma$ -butyrolactone. *Angew Chem Int Ed Engl* 2016;55:4188-93.
- [23] Zhao N, Ren C, Li H, Li Y, Liu S, Li Z. Selective ring-opening polymerization of non-strained  $\gamma$ -butyrolactone catalyzed by a cyclic trimeric phosphazene base. *Angew Chem Int Ed Engl* 2017;56:12987-90.
- [24] Walther P, Frey W, Naumann S. Polarized olefins as enabling (co)catalysts for the polymerization of  $\gamma$ -butyrolactone. *Polym Chem* 2018;9:3674-83.
- [25] Zhang CJ, Hu LF, Wu HL, Cao XH, Zhang XH. Dual organocatalysts for highly active and selective synthesis of linear poly( $\gamma$ -butyrolactone)s with high molecular weights. *Macromolecules* 2018;51:8705-11.
- [26] Lin L, Han D, Qin J, Wang S, Xiao M, Sun L, et al. Nonstrained  $\gamma$ -butyrolactone to high-molecular-weight poly( $\gamma$ -butyrolactone): Facile bulk polymerization using economical ureas/alkoxides. *Macromolecules* 2018;51:9317-22.
- [27] Gowda RR, Chen EYX. Sustainable polymers from biomass-derived  $\alpha$ -methylene- $\gamma$ -butyrolactones. In *Encyclopedia of polymer science and technology*. Hoboken, NJ: John Wiley & Sons, Inc. 2013 p. 1-37.
- [28] Zhu Y, Romain C, Williams CK. Sustainable polymers from renewable resources. *Nature* 2016;540:354-62.
- [29] Myers D, Cyriac A, Williams CK. Polymer synthesis: To react the impossible ring. *Nat Chem* 2016;8:3-4.
- [30] Hong M, Chen EYX. Chemically recyclable polymers: A circular economy approach to sustainability. *Green Chem* 2017;19:3692-706.
- [31] Zhang X, Fevre M, Jones GO, Waymouth RM. Catalysis as an enabling science for sustainable polymers. *Chem Rev* 2018;118:839-85.
- [32] Mohanty AK, Vivekanandhan S, Pin JM, Misra M. Composites from renewable and sustainable resources: Challenges and innovations. *Science* 2018;362:536-42.

- [33] Tang H, Luan Y, Yang L, Sun H. A perspective on reversibility in controlled polymerization systems: Recent progress and new opportunities. *Molecules* 2018;23:2870/1-16.
- [34] Hong M, Chen EYX. Future directions for sustainable polymers. *Trends Chem* 2019;1:148-51.
- [35] Tang X, Chen EYX. Toward infinitely recyclable plastics derived from renewable cyclic esters. *Chem* 2019;5:284-312.
- [36] Coates GW, Getzler YDYL Chemical recycling to monomer for an ideal, circular polymer economy. *Nat Rev Mater* 2020;5:501-16.
- [37] Danko M, Mosnacek J. Ring-opening polymerization of  $\gamma$ -butyrolactone and its derivatives: A review. *Polimery* 2017;62:272-82.
- [38] Yuan PJ, Hong M. Ring-opening polymerizations of the “non-strained”  $\gamma$ -butyrolactone and its derivatives: An overview and outlook. *Acta Polym Sin* 2019;50:327-37.
- [39] Kollar J, Danko M, Pippig F, Mosnacek J. Functional polymers and polymeric materials from renewable  $\alpha$ -unsaturated  $\gamma$ -butyrolactones. *Front Chem* 2019;7:845/1-8.
- [40] Song Q, Zhao J, Zhang G, Peruch F, Carloti S. Ring-opening (co)polymerization of  $\gamma$ -butyrolactone: A review. *Polym J* 2020;52:3-11.
- [41] Sogah DY, Hertler WR, Webster OW, Cohen GM. Group transfer polymerization. polymerization of acrylic monomers. *Macromolecules* 1987;20:1473-88.
- [42] Zhang Y, Miyake GM, John MG, Falivene L, Caporaso L, Cavallo L, Chen EY Lewis pair polymerization by classical and frustrated Lewis pairs: Acid, base and monomer scope and polymerization mechanism. *Dalton Trans* 2012;41:9119-34.
- [43] Chen EYX. Polymerization by classical and frustrated Lewis pairs. In: Erker G, Stephan DW, editors. *Frustrated Lewis pairs ii: Expanding the scope*. Berlin, Heidelberg: Springer Berlin Heidelberg, 2013. p. 239-60.
- [44] Overberger CG, Weise JK. Anionic ring-opening polymerization of thiolactones. *J Am Chem Soc* 1968;90:3533-7.
- [45] Nishikubo T, Kameyama A, Kawakami S. A novel synthesis of poly(ester-alt-sulfide)s by the ring-opening alternating copolymerization of oxiranes with  $\gamma$ -thiobutyrolactone using quaternary onium salts or crown ether complexes as catalysts. *Macromolecules*

- 1998;31:4746-52.
- [46] Kikuchi H, Tsubokawa N, Endo T. First example of cationic ring-opening polymerization of  $\gamma$ -thionobutyrolactone. *Chem Lett* 2005;34:376-7.
- [47] Zhang CJ, Cao XH, Zhang XH. Metal-free alternating copolymerization of nonstrained  $\gamma$ -selenobutyrolactone with epoxides for selenium-rich polyesters. *Macromolecules* 2019;53:203-11.
- [48] Pan X, Driessen F, Zhu X, Du Prez FE. Selenolactone as a building block toward dynamic diselenide-containing polymer architectures with controllable topology. *ACS Macro Lett* 2017;6:89-92.
- [49] Omoruyi U, Page S, Hallett J, Miller PW. Homogeneous catalyzed reactions of levulinic acid: To  $\gamma$ -valerolactone and beyond. *ChemSusChem* 2016;9:2037-47.
- [50] Meerwein H. Über oxoniumverbindungen des säure-ester und lactone. *Angew Chem* 1951;63:480-1.
- [51] Marvel CS, Levesque CL. The structure of vinyl polymers. III.<sup>1</sup> the polymer from  $\alpha$ -angelica lactone. *J Am Chem Soc* 1939;61:1682-4.
- [52] Iwakura Y, Tamikado T, Fujimoto Y, Ikegami S, Maruyama M. The copolymerization of unsaturated lactones with acrylonitrile. *Kobunshi Kagaku* 1958;15:469-74.
- [53] Yokoyama Y, Okada M, Sumitomo H. Cationic copolymerisation of 1,3-dioxolane with 5-methyl-2,3-dihydro-2-furanone initiated with triethyloxonium tetrafluoroborate. *Makromol Chem* 1974;175:2525-38.
- [54] Hirabayashi T, Yokota K. Copolymerization behavior of  $\beta$ -angelica lactone and styrene in the presence of organoaluminum chlorides. *Polym J* 1982;14:789-96.
- [55] Deng X, Yao J, Yuan M. Polymerization of lactides and lactones 11. Ring-opening polymerization of  $\alpha$ -acetyl- $\gamma$ -butyrolactone and copolymerization with  $\beta$ -butyrolactone. *Eur Polym J* 2000;36:2739-41.
- [56] Bednarek M. Cationic oligomerization of  $\alpha$ -hydroxy- $\gamma$ -butyrolactone. *Polimery* 2008;53:377-83.
- [57] Tarabanko VE, Kaygorodov KL. New environmentally benign polymers produced by copolymerization with  $\alpha$ -angelicalactone. *Macromol Symp* 2015;354:367-73.

- [58] Tada K, Numata Y, Saegusa T, Furukawa J. Copolymerization of  $\gamma$ -butyrolactone and  $\beta$ -propiolactone. *Makromol Chem* 1964;77:220-8.
- [59] Ito K, Inoue T, Yamashita Y. Copolymerizations of 3.3-bis(chloromethyl)oxacyclobutane with  $\beta$ -propiolactone and  $\gamma$ -butyrolactone by lewis acids: "Two-state" polymerization mechanism. *Makromol Chem* 1970;139:153-64.
- [60] Fedtke M, Haufe J, Kahlert E, Müller G. Cationic copolymerization of phenyl glycidyl ether with lactones. Characterization of the reaction mixture with chromatographic methods. *Angew Makromol Chem* 1998;255:53-9.
- [61] Chabanne P, Tighzert L, Pascault JP. Monoepoxy polymerization initiated by  $\text{BF}_3$ -amine complexes in bulk. III. Influence of  $\gamma$ -butyrolactone on polymer formation. *J Appl Polym Sci* 1994;53:787-806.
- [62] Kricheldorf HR, Mang T, Jonté JM. Poly lactones, 2 copolymerization of glycolide with  $\beta$ -propiolactone,  $\gamma$ -butyrolactone or  $\delta$ -valerolactone. *Makromol Chem* 1985;186:955-76.
- [63] Liu X, Hong M, Falivene L, Cavallo L, Chen EYX. Closed-loop polymer upcycling by installing property-enhancing comonomer sequences and recyclability. *Macromolecules* 2019;52:4570-8.
- [64] Lee CW, Urakawa R, Kimura Y. Copolymerization of  $\gamma$ -butyrolactone and  $\beta$ -butyrolactone. *Macromol Chem Phys* 1997;198:1109-20.
- [65] Lee CW, Urakawa R, Kimura Y. Copolymerization of  $\gamma$ -valerolactone and  $\beta$ -butyrolactone. *Eur Polym J* 1998;34:117-22.
- [66] Nakayama A, Kawasaki N, Arvanitoyannis I, Aiba S, Yamamoto N. Synthesis and biodegradation of poly( $\gamma$ -butyrolactone-co-L-lactide). *J Environ Polym Degrad* 1996;4:205-11.
- [67] Nakayama A, Kawasaki N, Aiba S, Maeda Y, Arvanitoyannis I, Yamamoto N. Synthesis and biodegradability of novel copolyesters containing  $\gamma$ -butyrolactone units. *Polymer* 1998;39:1213-22.
- [68] Kubisa P, Penczek S. Cationic activated monomer polymerization of heterocyclic monomers. *Prog Polym Sci* 1999;24:1409-37.
- [69] Ottou WN, Sardon H, Mecerreyes D, Vignolle J, Taton D. Update and challenges in organo-

- mediated polymerization reactions. *Prog Polym Sci* 2016;56:64-115.
- [70] Martin-Vaca B, Bourissou D. Ring-opening polymerization promoted by Brønsted acid catalysts. In: Andrew Dove HS, Stefan Naumann, editors. *Organic catalysis for polymerisation*. London: The Royal Society of Chemistry, 2018. p. 37-86.
- [71] Yamashita K, Yamamoto K, Kadokawa Ji. Acid-catalyzed ring-opening polymerization of  $\gamma$ -butyrolactone under high-pressure conditions. *Chem Lett* 2014;43:213-5.
- [72] Haba O, Itabashi H. Ring-opening polymerization of a five-membered lactone trans-fused to a cyclohexane ring. *Polym J* 2013;46:89-93.
- [73] Cywar RM, Zhu JB, Chen EYX. Selective or living organopolymerization of a six-five bicyclic lactone to produce fully recyclable polyesters. *Polym Chem* 2019;10:3097-106.
- [74] Lin WJ. Comparison of thermal characteristics and degradation properties of epsilon-caprolactone copolymers. *J Biomed Mater Res* 1999;47:420-3.
- [75] Urbanek T, Trousil J, Rak D, Gunar K, Konefal R, Slouf M, Sedlak M, Sebestova Janouskova O, Hruby M.  $\gamma$ -butyrolactone copolymerization with the well-documented polymer drug carrier poly(ethylene oxide)-block-poly(epsilon-caprolactone) to fine-tune its biorelevant properties *Macromol Biosci*. 2020;20:1900408/1-15.
- [76] Gao C, Tsou CH, Zeng CY, Yuan L, Peng R, Zhang XM. Organocatalyzed ring-opening copolymerization of  $\alpha$ -bromo- $\gamma$ -butyrolactone with  $\epsilon$ -caprolactone for the synthesis of functional aliphatic polyesters - pre-polymers for graft copolymerization *Des Monomers Polym* 2018;21:193-201.
- [77] Undin J, Olsén P, Godfrey J, Odelius K, Albertsson AC. Controlled copolymerization of the functional 5-membered lactone monomer,  $\alpha$ -bromo- $\gamma$ -butyrolactone, via selective organocatalysis. *Polymer* 2016;87:17-25.
- [78] Danko M, Basko M, Ďurkáčová S, Duda A, Mosnáček J. Functional polyesters with pendant double bonds prepared by coordination–insertion and cationic ring-opening copolymerizations of  $\epsilon$ -caprolactone with renewable Tulipalin A. *Macromolecules* 2018;51:3582-96.
- [79] Nederberg F, Connor EF, Moller M, Glauser T, Hedrick JL. New paradigms for organic catalysts: The first organocatalytic living polymerization. *Angew Chem Int Ed Engl*

- 2001;40:2712-5.
- [80] Carlotti S, Peruch F. Cyclic monomers: Epoxides, lactide, lactones, lactams, cyclic silicon-containing monomers, cyclic carbonates, and others. In: Hadjichristidis N, Hirao A, editors. Anionic polymerization. Tokyo: Springer Japan, 2015. p. 191-305.
- [81] Kiesewetter MK, Shin EJ, Hedrick JL, Waymouth RM. Organocatalysis: Opportunities and challenges for polymer synthesis. *Macromolecules* 2010;43:2093-107.
- [82] Dove AP. Organic catalysis for ring-opening polymerization. *ACS Macro Lett* 2012;1:1409-12.
- [83] Shanmugam S, Boyer C. Polymer synthesis. Organic photocatalysts for cleaner polymer synthesis. *Science* 2016;352:1053-4.
- [84] Song QL, Hu SY, Zhao JP, Zhang GZ. Organocatalytic copolymerization of mixed type monomers. *Chin J Polym Sci* 2017;35:581-601.
- [85] Xia Y, Zhao J. Macromolecular architectures based on organocatalytic ring-opening (co)polymerization of epoxides. *Polymer* 2018;143:343-61.
- [86] Dove A, Sardon H, Naumann S, Editors. Organic catalysis for polymerisation. London: Royal Society of Chemistry, 2018. 648 pp.
- [87] Jehanno C, Pérez-Madrigal MM, Demarteau J, Sardon H, Dove AP. Organocatalysis for depolymerisation. *Polym Chem* 2019;10:172-86.
- [88] Bossion A, Heifferon KV, Meabe L, Zivic N, Taton D, Hedrick JL, et al. Opportunities for organocatalysis in polymer synthesis via step-growth methods. *Prog Polym Sci* 2019;90:164-210.
- [89] Tang J, Chen EYX. Increasing complexity in organopolymerization of multifunctional  $\gamma$ -butyrolactones. *Eur Polym J* 2017;95:678-92.
- [90] Tang J, Chen EYX. Organopolymerization of naturally occurring Tulipalin B: A hydroxyl-functionalized methylene butyrolactone. *Org Chem Front.* 2015;2:1625-31.
- [91] Hong M, Tang X, Newell BS, Chen EYX. "Nonstrained"  $\gamma$ -butyrolactone-based copolyesters: Copolymerization characteristics and composition-dependent (thermal, eutectic, cocrystallization, and degradation) properties. *Macromolecules* 2017;50:8469-79.
- [92] Shen Y, Zhang J, Zhao N, Liu F, Li Z. Preparation of biorenewable poly( $\gamma$ -butyrolactone)-

- b-poly(L-lactide) diblock copolyesters via one-pot sequential metal-free ring-opening polymerization. *Polym Chem* 2018;9:2936-41.
- [93] Zhao N, Ren C, Shen Y, Liu S, Li Z. Facile synthesis of aliphatic  $\omega$ -pentadecalactone containing diblock copolyesters via sequential ROP with l-lactide,  $\epsilon$ -caprolactone, and  $\delta$ -valerolactone catalyzed by cyclic trimeric phosphazene base with inherent tribasic characteristics. *Macromolecules* 2019;52:1083-91.
- [94] Shen Y, Zhang J, Zhao Z, Zhao N, Liu F, Li Z. Preparation of amphiphilic poly(ethylene glycol)- b-poly( $\gamma$ -butyrolactone) diblock copolymer via ring opening polymerization catalyzed by a cyclic trimeric phosphazene base or alkali alkoxide. *Biomacromolecules* 2019;20:141-8.
- [95] Ohsawa S, Morino K, Sudo A, Endo T. Alternating copolymerization of bicyclic bis( $\gamma$ -butyrolactone) and epoxide through zwitterion process by phosphines. *Macromolecules* 2010;43:3585-8.
- [96] Ohsawa S, Morino K, Sudo A, Endo T. Synthesis of a reactive polyester bearing  $\alpha,\beta$ -unsaturated ketone groups by anionic alternating copolymerization of epoxide and bicyclic bis( $\gamma$ -butyrolactone) bearing isopropenyl group. *Macromolecules* 2011;44:1814-20.
- [97] Ohsawa S, Morino K, Sudo A, Endo T. Synthesis of bicyclic bis( $\gamma$ -butyrolactone) derivatives bearing sulfide moieties and their alternating copolymers with epoxide. *J Polym Sci Part A Polym Chem* 2012;50:4666-73.
- [98] Tarabanko V, Kaygorodov K. New biodegradable polymers based on  $\alpha$ -angelicalactone. *Chem Sustain Dev* 2010;3:321-8.
- [99] Tarabanko VE, Kaygorodov KL, Chernyak MY. Polyesterification of alpha-angelicalactone. *J Sib Fed Univ Chem* 2008;2:118-23.
- [100] Kaygorodov KL, Tarabanko VE, Tarabanko N, Foreman MRS. Thermodynamics of  $\alpha$ -angelicalactone polymerization. *Cogent Chem* 2018;4:1443689/1-10.
- [101] Tadokoro A, Takata T, Endo T. Efficient ring-opening polymerization of a  $\gamma$ -butyrolactone derivative. First anionic double ring-opening polymerization. *Macromolecules* 1993;26:2388-9.
- [102] Bhaw-Luximon A, Jhurry D, Motala-Timol S, Lochee Y. Polymerization of  $\epsilon$ -caprolactone



- and its copolymerization with  $\gamma$ -butyrolactone using metal complexes. *Macromol Symp* 2005;231:60-8.
- [103] Hall HK. Polymerization and ring strain in bridged bicyclic compounds. *J Am Chem Soc* 1958;80:6412-20.
- [104] Okada M, Sumitomo H. Stereochemical aspects of the cationic ring-opening polymerization of hetero bicyclic compounds. *Makromol Chem* 1985;14:29-43.
- [105] Takata T, Tadokoro A, Endo T. Anionic ring-opening alternating copolymerization of a bicyclobis( $\gamma$ -butyrolactone) with epoxide. *Macromolecules* 1992;25:2782-3.
- [106] Tadokoro A, Takata T, Endo T. Anionic ring-opening alternating copolymerization of a bicyclic bis( $\gamma$ -lactone) with an epoxide: A novel ring-opening polymerization of a monomer containing a  $\gamma$ -lactone structure. *Macromolecules* 1993;26:4400-6.
- [107] Chung K, Takata T, Endo T. Anionic copolymerization of bicyclic bis( $\gamma$ -lactone)s with poly(glycidyl methacrylate) and volume change during the copolymerization. *Macromolecules* 1995;28:4044-6.
- [108] Takata T, Tadokoro A, Chung K, Endo T. Anionic ring-opening alternating copolymerizations of bicyclic and spirocyclic bis( $\gamma$ -lactone)s with epoxides via a tandem double ring-opening isomerization of the bislactones. *Macromolecules* 1995;28:1340-5.
- [109] Zhang C, Ochiai B, Endo T. Matrix-assisted laser desorption/ionization time-of-flight mass spectrometry study on copolymers obtained by the alternating copolymerization of bis( $\gamma$ -lactone) and epoxide with potassium tert-butoxide. *J Polym Sci Part A Polym Chem* 2005;43:2643-9.
- [110] Chung K, Takata T, Endo T. Anionic ring-opening copolymerization of bicyclic bis( $\gamma$ -lactone)s with mono- and bifunctional epoxides via double ring-opening isomerization of the bis( $\gamma$ -lactone)s and volume change during copolymerization. *Macromolecules* 1995;28:3048-54.
- [111] Chung K, Takata T, Endo T. Anionic cross-linking of polymers having an epoxy group in the side chain with bicyclic and spirocyclic bis( $\gamma$ -lactone)s. *Macromolecules* 1997;30:2532-8.
- [112] Kuran W. Coordination polymerization of heterocyclic and heterounsaturated monomers.

- Prog Polym Sci 1998;23:919-92.
- [113] Penczek S, Duda A, Kubisa P, Slomkowski S. Ionic and coordination ring-opening polymerization. In: Krzysztof Matyjaszewski YG, Ludwik Leibler, editors. Macromolecular engineering: Precise synthesis, materials properties, applications Weinheim: Wiley-VCH Verlag GmbH & Co. KGaA 2011. p. 103-59.
- [114] Ajellal N, Carpentier JF, Guillaume C, Guillaume SM, Helou M, Poirier V, Sarazin Y, Trifonov A. Metal-catalyzed immortal ring-opening polymerization of lactones, lactides and cyclic carbonates. Dalton Trans 2010;39:8363-76.
- [115] Stirling E, Champouret Y, Visseaux M. Catalytic metal-based systems for controlled statistical copolymerisation of lactide with a lactone. Polym Chem 2018;9:2517-31.
- [116] Li H, Shakaroun RM, Guillaume SM, Carpentier JF. Recent advances in metal-mediated stereoselective ring-opening polymerization of functional cyclic esters towards well-defined poly(hydroxy acid)s: From stereoselectivity to sequence-control. Chemistry 2020;26:128-38.
- [117] Culkin DA, Jeong W, Csihony S, Gomez ED, Balsara NP, Hedrick JL, Waymouth RM. Zwitterionic polymerization of lactide to cyclic poly(lactide) by using n-heterocyclic carbene organocatalysts. Angew Chem Int Ed Engl 2007;46:2627-30.
- [118] Tang J, Chen EYX. Effects of chain ends on thermal and mechanical properties and recyclability of poly( $\gamma$ -butyrolactone). J Polym Sci Part A Polym Chem 2018;56:2271-9.
- [119] Tang X, Hong M, Falivene L, Caporaso L, Cavallo L, Chen EY. The quest for converting biorenewable bifunctional  $\alpha$ -methylene- $\gamma$ -butyrolactone into degradable and recyclable polyester: Controlling vinyl-addition/ring-opening/cross-linking pathways. J Am Chem Soc 2016;138:14326-37.
- [120] Zhu JB, Watson EM, Tang J, Chen EY. A synthetic polymer system with repeatable chemical recyclability. Science 2018;360:398-403.
- [121] Liu Y, Wu J, Liang H, Jin Z, Sheng L, Hu X, Zhu N, Guo K. Organomagnesium towards efficient synthesis of recyclable polymers. Eur Polym J 2020;130:109659/1-4
- [122] Zhu JB, Chen EY. Catalyst-sidearm-induced stereoselectivity switching in polymerization of a racemic lactone for stereocomplexed crystalline polymer with a circular life cycle.

- Angew Chem Int Ed Engl 2019;58:1178-82.
- [123] Zhu JB, Chen EY. Living coordination polymerization of a six-five bicyclic lactone to produce completely recyclable polyester. *Angew Chem Int Ed Engl* 2018;57:12558-62.
- [124] Hori Y, Yamaguchi A, Hagiwara T. Chemical synthesis of high molecular weight poly(3-hydroxybutyrate-co-4-hydroxybutyrate). *Polymer* 1995;36:4703-5.
- [125] Duda A, Penczek S, Dubois P, Mecerreyes D, Jérôme R. Oligomerization and copolymerization of  $\gamma$ -butyrolactone — a monomer known as unable to homopolymerize, 1. Copolymerization with  $\epsilon$ -caprolactone. *Macromol Chem Phys* 1996;197:1273-83.
- [126] Duda A, Biela T, Libiszowski J, Penczek S, Dubois P, Mecerreyes D, et al. Block and random copolymers of  $\epsilon$ -caprolactone. *Polym Degrad Stab* 1998;59:215-22.
- [127] Nishiura M, Hou Z, Koizumi TA, Imamoto T, Wakatsuki Y. Ring-opening polymerization and copolymerization of lactones by samarium(II) aryloxide complexes. *Macromolecules* 1999;32:8245-51.
- [128] Duda A, Libiszowski J, Mosnáček J, Penczek S. Copolymerization of cyclic esters at the living polymer-monomer equilibrium. *Macromol Symp* 2005;226:109-20.
- [129] Wei Z, Liu L, Qi M. Synthesis and characterization of homo- and co-polymers of (r,s)- $\beta$ -butyrolactone and  $\gamma$ -butyrolactone or  $\beta$ -valerolactone initiated with cyclic tin alkoxide. *React Funct Polym* 2006;66:1411-9.
- [130] Qiu H, Shah MI, Bai T, Jiang L, Ling J. Zwitterionic copolymerization of  $\gamma$ -butyrolactone with 3,3-bis(chloromethyl) oxacyclobutane catalyzed by scandium triflates. *Polym Chem* 2020;11:1845-51.
- [131] Ubaghs L, Waringo M, Helmut Keul A, Höcker H. Copolymers and terpolymers of tetramethylene urea,  $\gamma$ -butyrolactone, and ethylene carbonate or 1,2-propylene carbonate. *Macromolecules* 2004;37:6755-62.
- [132] Lu L, Huang K. Synthesis and characteristics of a novel aliphatic polycarbonate, poly[(propylene oxide)-co-(carbon dioxide)-co-( $\gamma$ -butyrolactone)] *Polym Int* 2005;54:870-4.
- [133] Lu L, Huang K. Preparation of poly(propylene-co- $\gamma$ -butyrolactone carbonate) and release profiles of drug-loaded microcapsules. *J Polym Sci Part A Polym Chem* 2005;43:2468-75.

- [134] Gagliardi M, Di Michele F, Mazzolai B, Bifone AJJoPR. Chemical synthesis of a biodegradable pegylated copolymer from  $\epsilon$ -caprolactone and  $\gamma$ -valerolactone: Evaluation of reaction and functional properties. *J Polym Res* 2015;22:17/1-12.
- [135] Gagliardi M, Bifone AJPo. Ring-opening copolymerization thermodynamics and kinetics of  $\gamma$ -valerolactone/ $\epsilon$ -caprolactone. *PLoS One* 2018;13:e0199231/1-15.
- [135] Hong M, Chen EYX. Coordination ring-opening copolymerization of naturally renewable  $\alpha$ -methylene- $\gamma$ -butyrolactone into unsaturated polyesters. *Macromolecules* 2014;47:3614-24.
- [137] Zhou J, Schmidt AM, Ritter H. Bicomponent transparent polyester networks with shape memory effect. *Macromolecules* 2010;43:939-42.
- [138] Chen T, Qin Z, Qi Y, Deng T, Ge X, Wang J, et al. Degradable polymers from ring-opening polymerization of  $\alpha$ -angelica lactone, a five-membered unsaturated lactone. *Polym Chem* 2011;2:1190-4.
- [139] Gümüştaş S, Balcan M, Kınal A. Computational determination of ring opening polymerization reaction mechanism of  $\alpha$ -angelica lactone. *Comput Theor Chem* 2018;1142:1-8.
- [140] Xi X, Jiang G, Wang X, Hu R, Wang R. Synthesis, characterization and degradation properties of poly( $\alpha$ -angelica lactone-co- $\epsilon$ -caprolactone) copolymers. *Polym Renew Resour* 2013;4:49-60.
- [141] Olsén P, Undin J, Odelius K, Albertsson AC. Establishing  $\alpha$ -bromo- $\gamma$ -butyrolactone as a platform for synthesis of functional aliphatic polyesters – bridging the gap between rop and SET-LRP. *Polym Chem* 2014;5:3847-54.
- [142] Sardon H, Dove AP. Plastics recycling with a difference. *Science* 2018;360:380-1.
- [143] Sangroniz A, Zhu JB, Tang X, Etxeberria A, Chen EY, Sardon H. Packaging materials with desired mechanical and barrier properties and full chemical recyclability. *Nat Commun* 2019;10:3559/1-7.
- [144] Hua G, Franzen J, Odelius K. One-pot inimer promoted ROCP synthesis of branched copolyesters using  $\alpha$ -hydroxy- $\gamma$ -butyrolactone as the branching reagent. *J Polym Sci Part A Polym Chem* 2016;54:1908-18.

- [145] Hatamvand R, Shams A, Mohammadifar E, Yari A, Adeli M. Synthesis of boronic acid-functionalized poly(glycerol-oligo $\gamma$ -butyrolactone): Nano-networks for efficient electrochemical sensing of biosystems. *J Polym Sci Part A Polym Chem* 2019;57:1430-9.
- [146] Piedra-Arroni E, Amgoune A, Bourissou D. Dual catalysis: New approaches for the polymerization of lactones and polar olefins. *Dalton Trans* 2013;42:9024-9.
- [147] Winnacker M, Vagin S, Rieger B. Cooperative catalysis in polymerization reactions. In: Peters R, editor. *Cooperative catalysis: Designing efficient catalysts for synthesis*. Weinheim: Wiley-VCH Verlag GmbH & Co. KGaA 2015. p. 373-416.
- [148] Stephan DW. The broadening reach of frustrated Lewis pair chemistry. *Science* 2016;354:aaf7229/1-8.
- [149] Hong M, Chen J, Chen EY. Polymerization of polar monomers mediated by main-group lewis acid-base pairs. *Chem Rev* 2018;118:10551-616.
- [150] Li X, Chen C, Wu J. Lewis pair catalysts in the polymerization of lactide and related cyclic esters. *Molecules* 2018;23:189/1-13.
- [150] Basterretxea A, Jehanno C, Mecerreyes D, Sardon H. Dual organocatalysts based on ionic mixtures of acids and bases: A step toward high temperature polymerizations. *ACS Macro Lett* 2019;8:1055-62.
- [152] Pappuru S, Chakraborty D. Progress in metal-free cooperative catalysis for the ring-opening copolymerization of cyclic anhydrides and epoxides. *Eur Polym J* 2019;121:109276/1-12.
- [153] Thomas C, Bibal B. Hydrogen-bonding organocatalysts for ring-opening polymerization. *Green Chem* 2014;16:1687-99.
- [154] Dharmaratne NU, Pothupitiya JU, Kiesewetter MK. The mechanistic duality of (thio)urea organocatalysts for ring-opening polymerization. *Org Biomol Chem* 2019;17:3305-13.
- [155] Jain I, Malik P. Advances in urea and thiourea catalyzed ring opening polymerization: A brief overview. *Eur Polym J* 2020;133:109791/1-17.
- [156] Xia Y, Chen Y, Song Q, Hu S, Zhao J, Zhang G. Base-to-base organocatalytic approach for one-pot construction of poly(ethylene oxide)-based macromolecular structures. *Macromolecules* 2016;49:6817-25.

- [157] Liu Y, Wang X, Li Z, Wei F, Zhu H, Dong H, et al. A switch from anionic to bifunctional H-bonding catalyzed ring-opening polymerizations towards polyether–polyester diblock copolymers. *Polym Chem* 2018;9:154-9.
- [158].. Shen Y, Zhao Z, Li Y, Liu S, Liu F, Li Z. A facile method to prepare high molecular weight bio-renewable poly( $\gamma$ -butyrolactone) using a strong base/urea binary synergistic catalytic system. *Polym Chem* 2019;10:1231-7.
- [159] Shen Y, Xiong W, Li Y, Zhao Z, Lu H, Li Z. Chemoselective polymerization of fully biorenewable  $\alpha$ -methylene- $\gamma$ -butyrolactone using organophosphazene/urea binary catalysts toward sustainable polyesters. *CCS Chemistry*. 2020;0:620-30.
- [160] Zhao Z, Shen Y, Kou X, Shi J, Wang R, Liu F, Li Z. Organocatalytic ring-opening copolymerization of biorenewable  $\alpha$ -methylene- $\gamma$ -butyrolactone toward functional copolyesters: Preparation and composition dependent thermal properties. *Macromolecules* 2020;53:3380-9.
- [161] Walther P, Naumann S. N-heterocyclic olefin-based (co)polymerization of a challenging monomer: Homopolymerization of  $\omega$ -pentadecalactone and its copolymers with  $\gamma$ -butyrolactone,  $\delta$ -valerolactone, and  $\epsilon$ -caprolactone. *Macromolecules* 2017;50:8406-16.
- [162] Clayman NE, Morris LS, LaPointe AM, Keresztes I, Waymouth RM, Coates GW. Dual catalysis for the copolymerisation of epoxides and lactones. *Chem Commun* 2019;55:6914-7.
- [163] Niu Y, Li H. Terpolymerization of carbon dioxide with propylene oxide and  $\gamma$ -butyrolactone catalyzed by salenco<sup>III</sup> (2,4-dinitrophenoxy) and lewis-basic cocatalyst. *Adv Polym Tech* 2018;37:230-4.
- [164] Fukuzaki H, Aiba Y, Yoshida M, Asano M, Kumakura M. Direct copolymerization of L-lactic acid with  $\gamma$ -butyrolactone in the absence of catalysts. *Makromol Chem* 1989;190:1553-9.
- [165] Fukuzaki H, Yoshida M, Asano M, Aiba Y, Kumakura M. Direct copolymerization of glycolic acid with lactones in the absence of catalysts. *Eur Polym J* 1990;26:457-61.
- [166] Fukuzaki H, Yoshida M, Asano M, Kumakura M, Mashimo T, Yuasa H, et al. A new biodegradable copolymer of glycolic acid and lactones with relatively low molecular

- weight prepared by direct copolycondensation in the absence of catalysts. *J Biomed Mater Res* 1991;25:315-28.
- [167] Matsumura S. Enzymatic synthesis of polyesters via ring-opening polymerization. In: Kobayashi S, Ritter H, Kaplan D, editors. *Enzyme-catalyzed synthesis of polymers*. Berlin, Heidelberg: Springer Berlin Heidelberg, 2005. p. 95-132.
- [168] Champagne E, Strandman S, Zhu XX. Recent developments and optimization of lipase-catalyzed lactone formation and ring-opening polymerization. *Macromol Rapid Commun* 2016;37:1986-2004.
- [169] Yang J, Liu Y, Liang X, Yang Y, Li Q. Enantio-, regio-, and chemoselective lipase-catalyzed polymer synthesis. *Macromol Biosci* 2018;18:1800131/1-9.
- [170] Engel J, Cordellier A, Huang L, Kara S. Enzymatic ring-opening polymerization of lactones: Traditional approaches and alternative strategies. *ChemCatChem* 2019;11:4983-97.
- [171] Nobes GAR, Kazlauskas RJ, Marchessault RH. Lipase-catalyzed ring-opening polymerization of lactones: A novel route to poly(hydroxyalkanoate)s. *Macromolecules* 1996;29:4829-33.
- [172] Dong H, Wang H, Cao SG, Shen JC Lipase-catalyzed polymerization of lactones and linear hydroxyesters. *Biotechnol Lett* 1998;20:905-8.
- [173] Gorke JT, Okrasa K, Louwagie A, Kazlauskas RJ, Sreenc F. Enzymatic synthesis of poly(hydroxyalkanoates) in ionic liquids. *J Biotechnol* 2007;132:306-13.
- [174] Kadokawa J, Iwasaki Y, Tagaya H. Ring-opening polymerization of lactones catalyzed by ion-exchanged clay montmorillonite. *Green Chem* 2002;4:14-6.
- [175] Miura H, Tajima T, Nagata M, Royama T, Saito K, Hasegawa M. Synthesis of poly(ester ether)s by the reaction of  $\gamma$ -butyrolactone with diols and their application to polyurthaus. *Kobunshi Ronbunshu* 1999;56:291-7.
- [176] Arasa M, Ramis X, Maria?? Salla J, Mantecón A, Serra A. FTIR/ATR study of the copolymerization of diglycidyl ether of bisphenol a with methyl-substituted  $\gamma$ -lactones catalyzed by rare earth triflate initiators. *J Polym Sci Part A Polym Chem* 2007;45:2129-41.

- [177] Arasa M, Ramis X, Salla JM, Mantecón A, Serra A. Kinetic study by FTIR and DSC on the cationic curing of a DGEBA/ $\gamma$ -valerolactone mixture with ytterbium triflate as an initiator. *Thermochim Acta* 2008;479:37-44.
- [178] Arasa M, Ramis X, Salla JM, Ferrando F, Serra A, Mantecón A. Study on the effect of rare earth metal triflates as initiators in the cationic curing of DGEBA/ $\gamma$ -valerolactone mixtures and characterization of the thermosets obtained. *Eur Polym J* 2009;45:1282-92.
- [179] Spegazzini N, Ruisánchez I, Larrechi MS, Serra A, Mantecón A. Two-dimensional Fourier transform infrared correlation spectroscopy and evolving factor analysis in the study of cationic curing of DGEBA and  $\gamma$ -valerolactone mixtures. *J Polym Sci Part A Polym Chem* 2008;46:3886-99.
- [180] Arasa M, Ramis X, Salla JM, Mantecón A, Serra A. A study of the degradation of ester-modified epoxy resins obtained by cationic copolymerization of DGEBA with  $\gamma$ -lactones initiated by rare earth triflates. *Polym Degrad Stab* 2007;92:2214-22.
- [181] Arasa M, Ramis X, Salla JM, Mantecón A, Serra A. Anionic copolymerization of DGEBA with two bicyclic bis( $\gamma$ -lactone) derivatives using tertiary amines as initiators. *Polymer* 2009;50:2228-36.
- [182] Ohsawa S, Barkakaty B, Sudo A, Endo T. Acid-promoted double ring-opening reaction of bicyclobis ( $\gamma$ -butyrolactone) with alcohol and its application to polyester synthesis. *J Polym Sci Part A Polym Chem* 2012;50:1281-9.
- [183] Moins S, Loyer P, Odent J, Coulembier O. Preparation of a mimetic and degradable poly(ethylene glycol) by a non-eutectic mixture of organocatalysts (NEMO) via a one-pot two-step process. *RSC Adv* 2019;9:40013-6.
- [184] Hu S, Zhao J, Zhang G. Noncopolymerization approach to copolymers via concurrent transesterification and ring-opening reactions. *ACS Macro Lett* 2015;5:40-4.
- [185] Liu X, Hong M. Transesterification by air/moisture-tolerant bifunctional organocatalyst to produce 'nonstrained'  $\gamma$ -butyrolactone-based aliphatic copolyesters: Turning a bane into a boon. *Eur Polym J* 2019;121:109277/1-10.
